# Supplementary material for: Segal’s Law, 16S rRNA gene sequencing, and the perils of foodborne pathogen detection within the American Gut Project
Source: PeerJ journal article supplement (doi:10.7717/peerj.3480), 2017-06-22

# Kingdom Greengenes

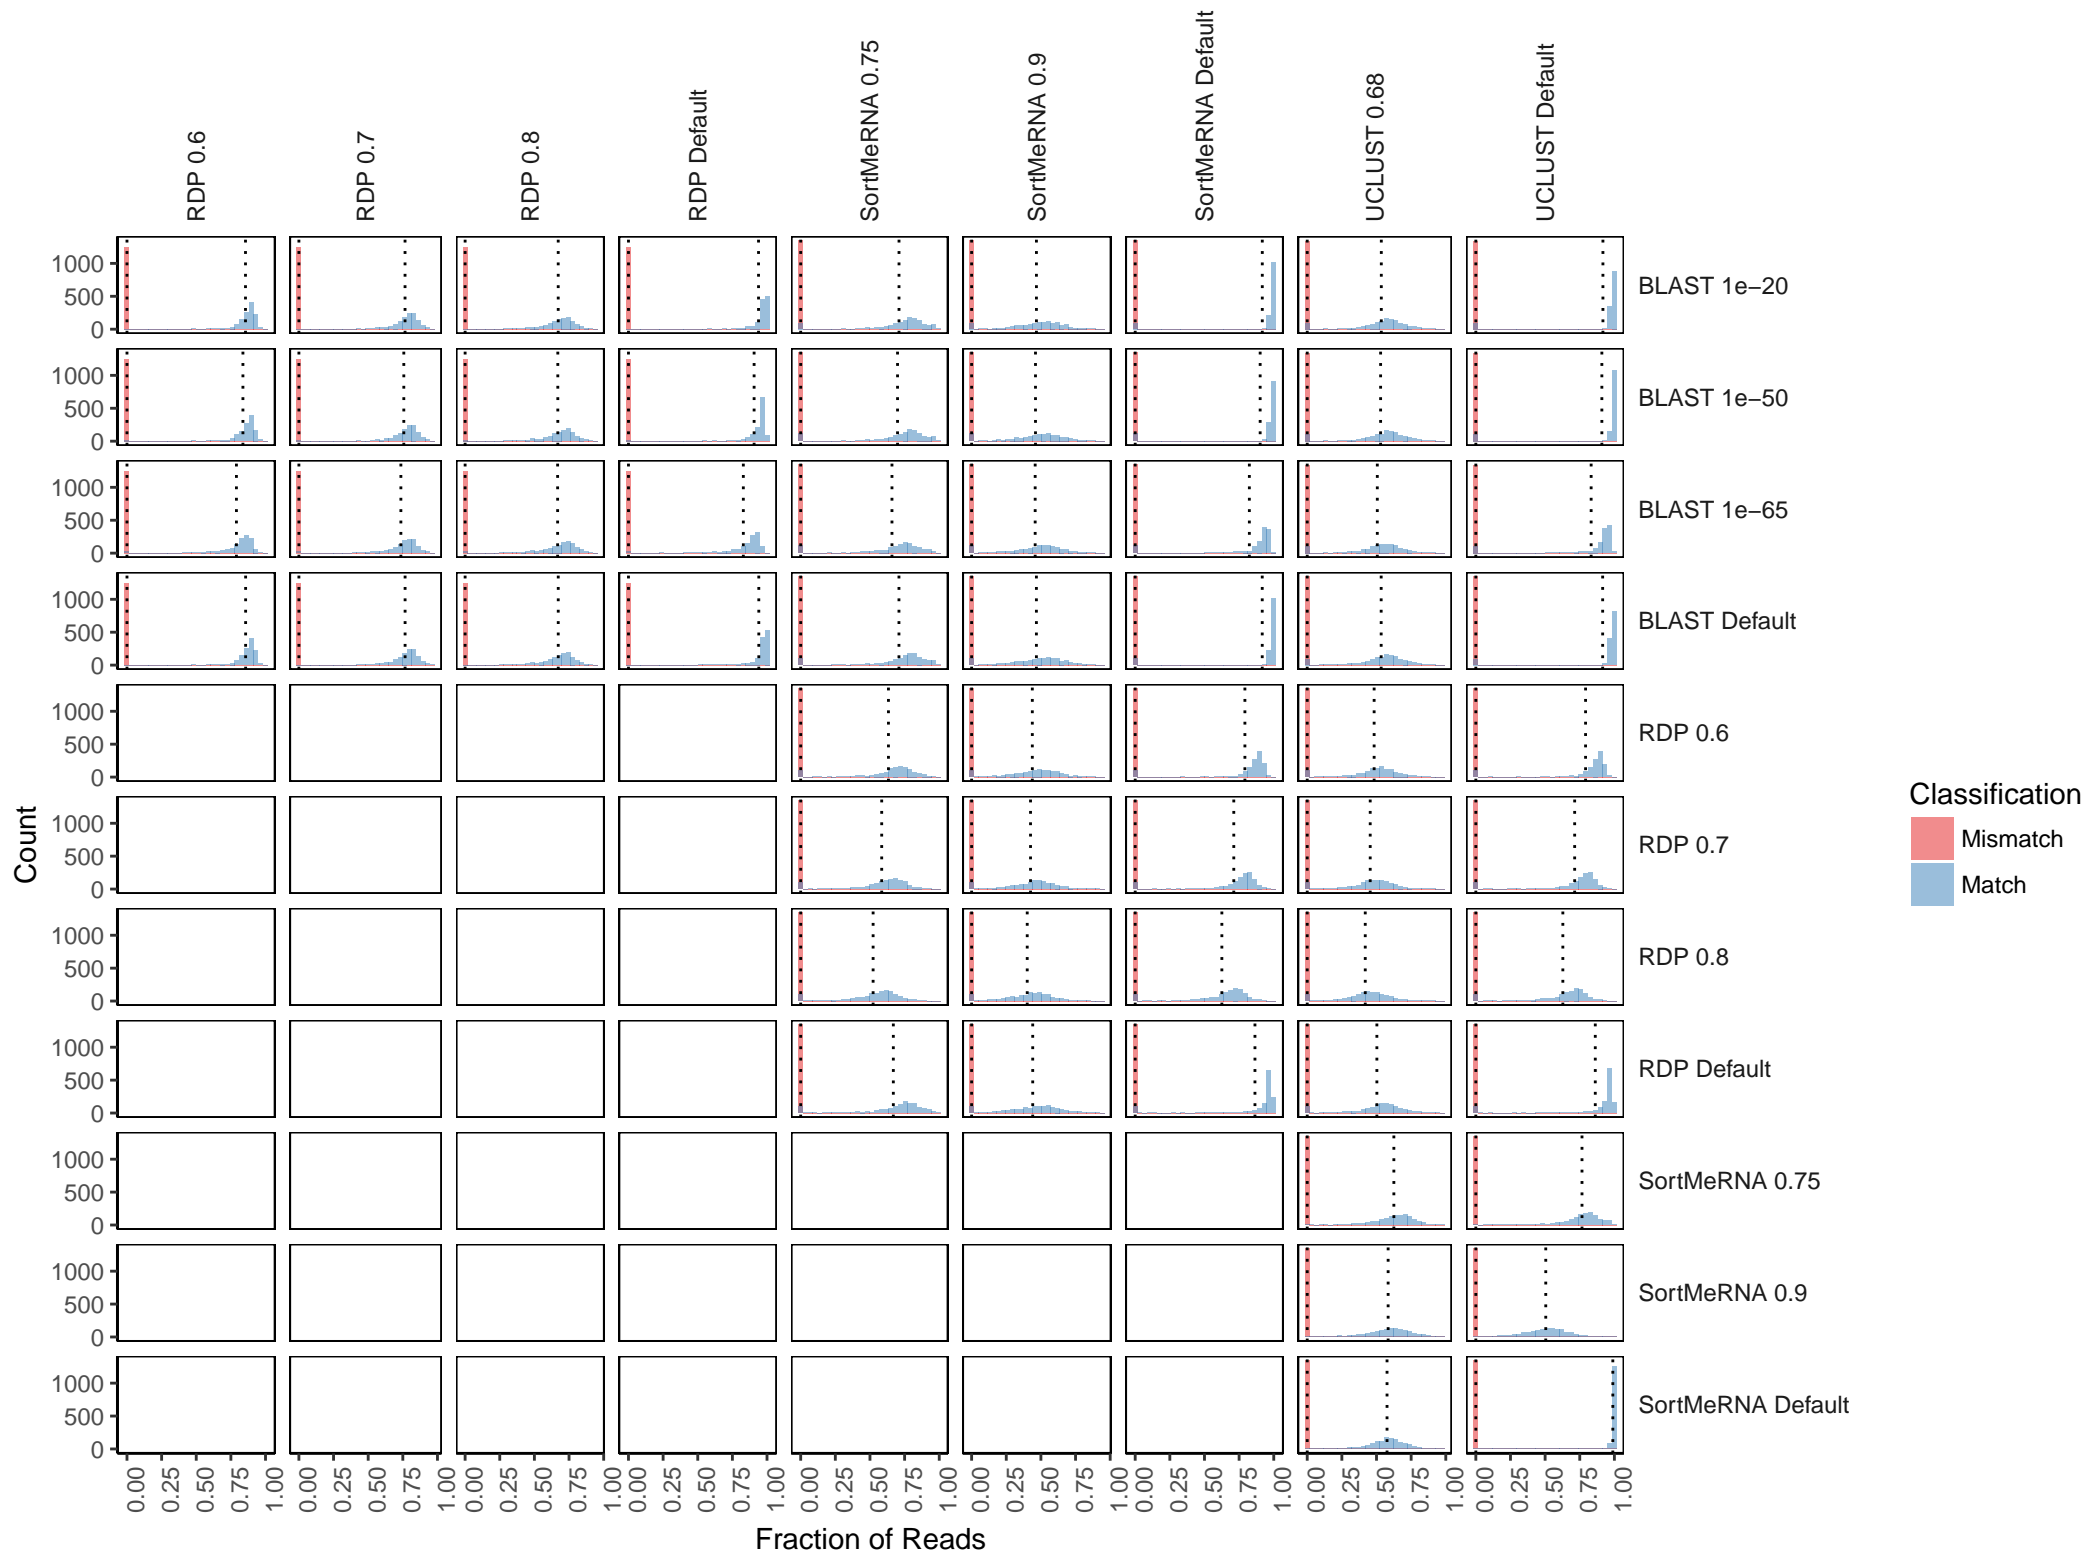

# Phylum Greengenes

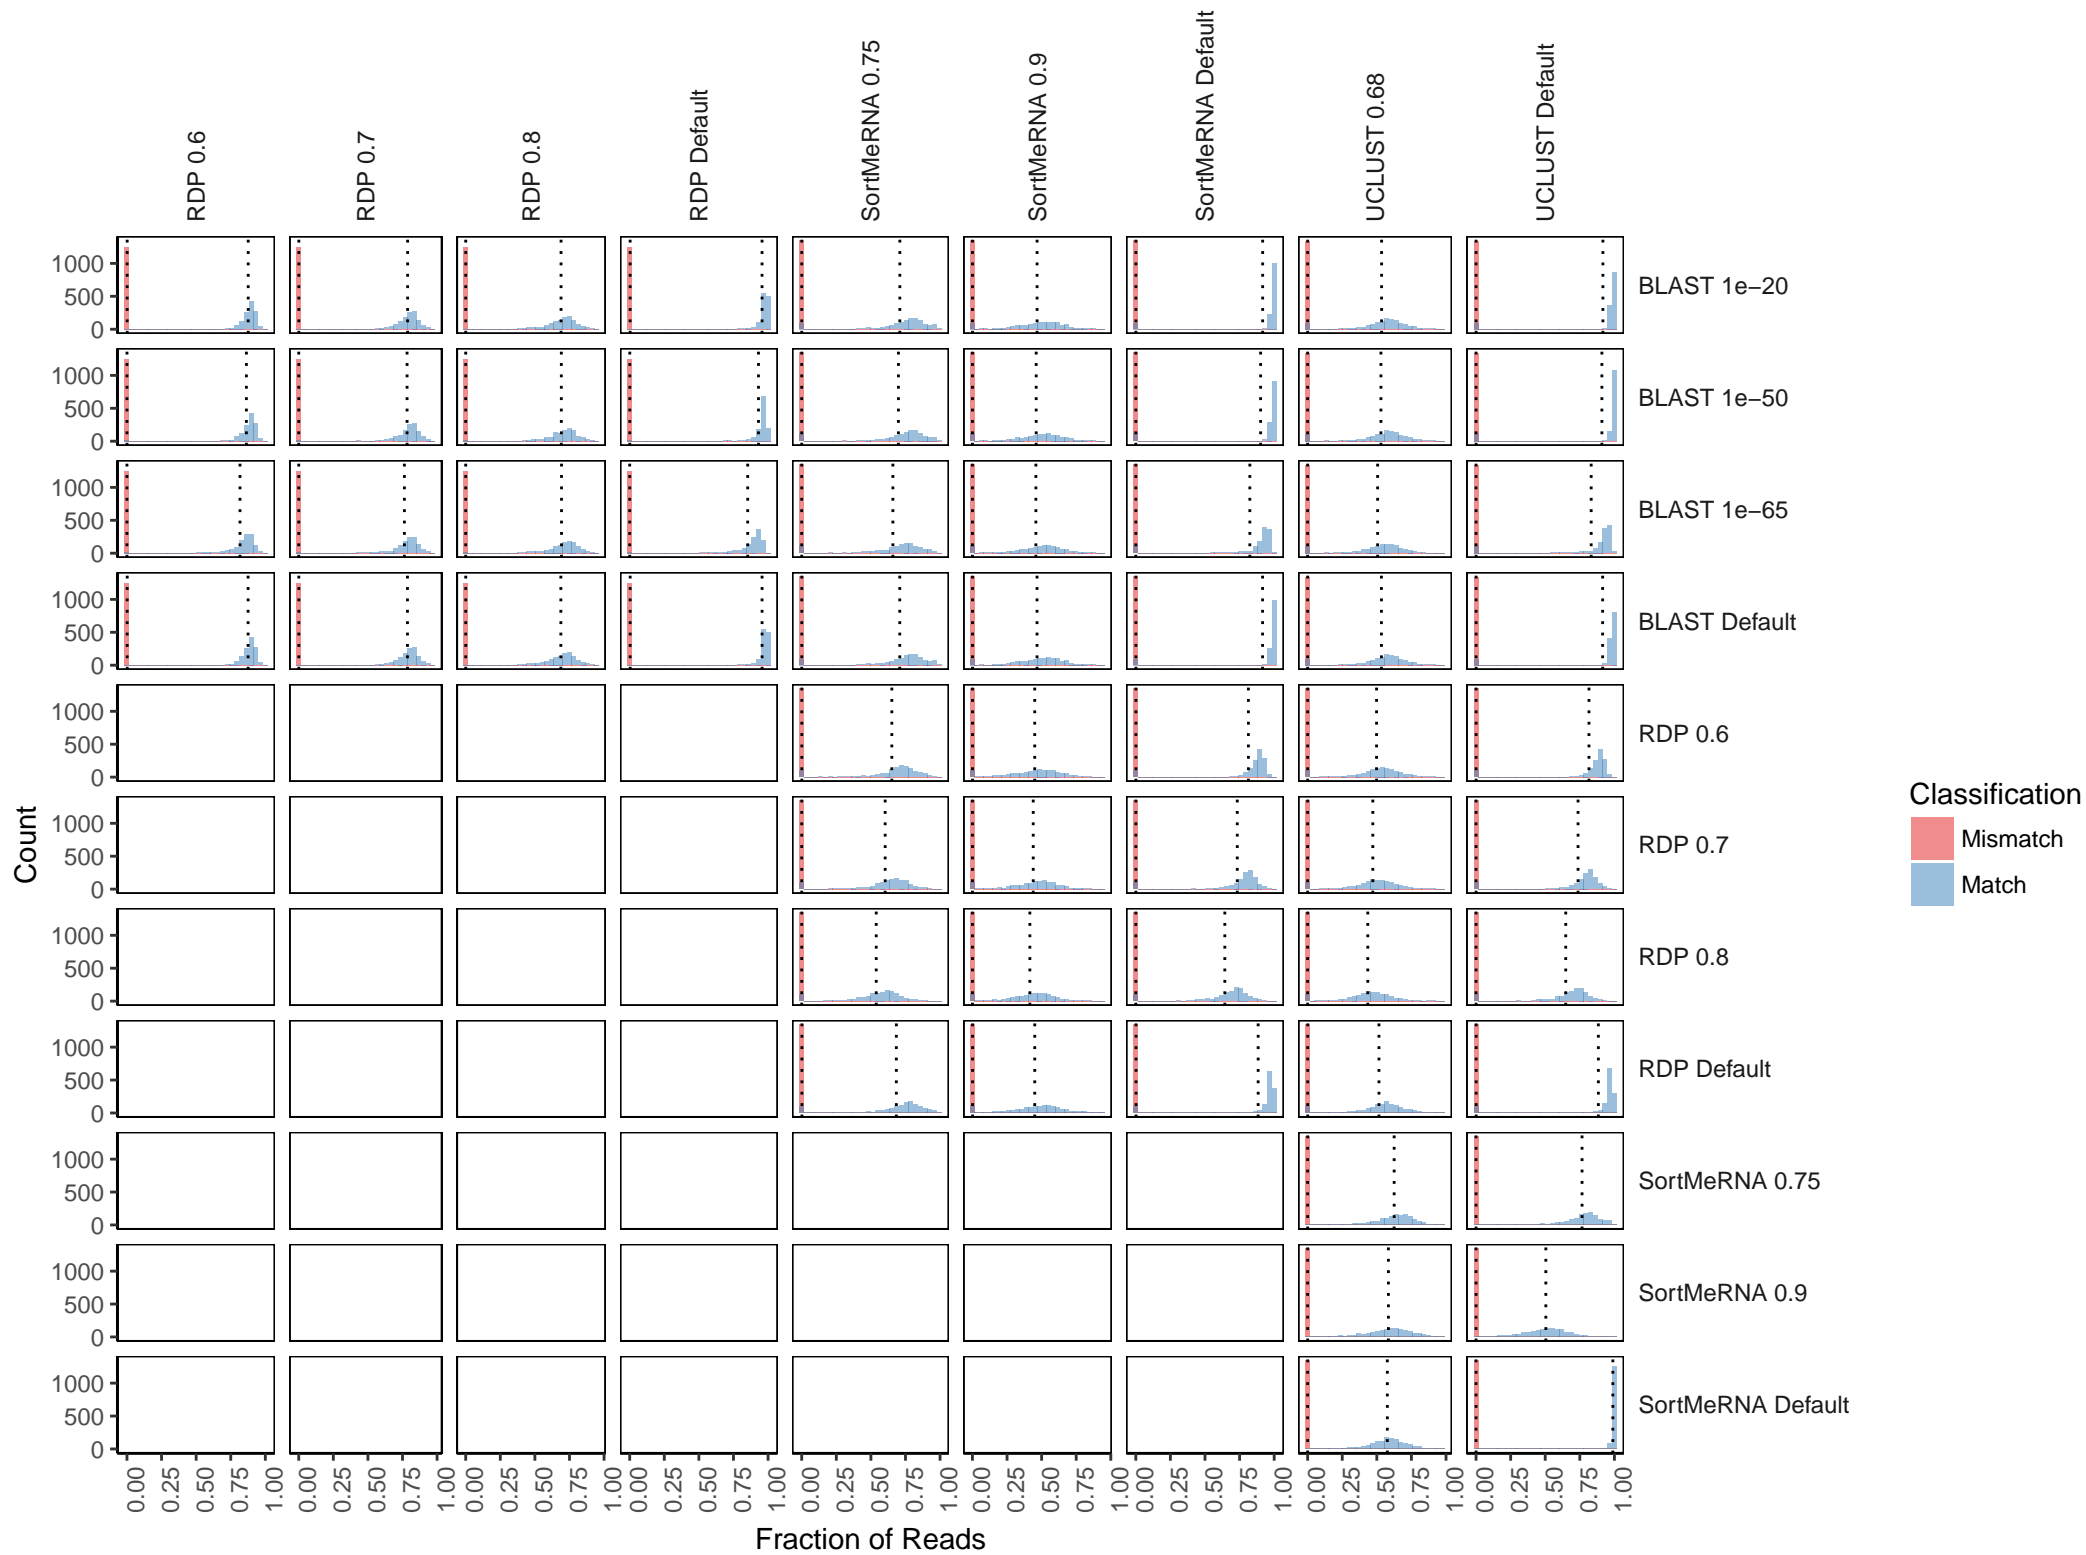

# Class Greengenes

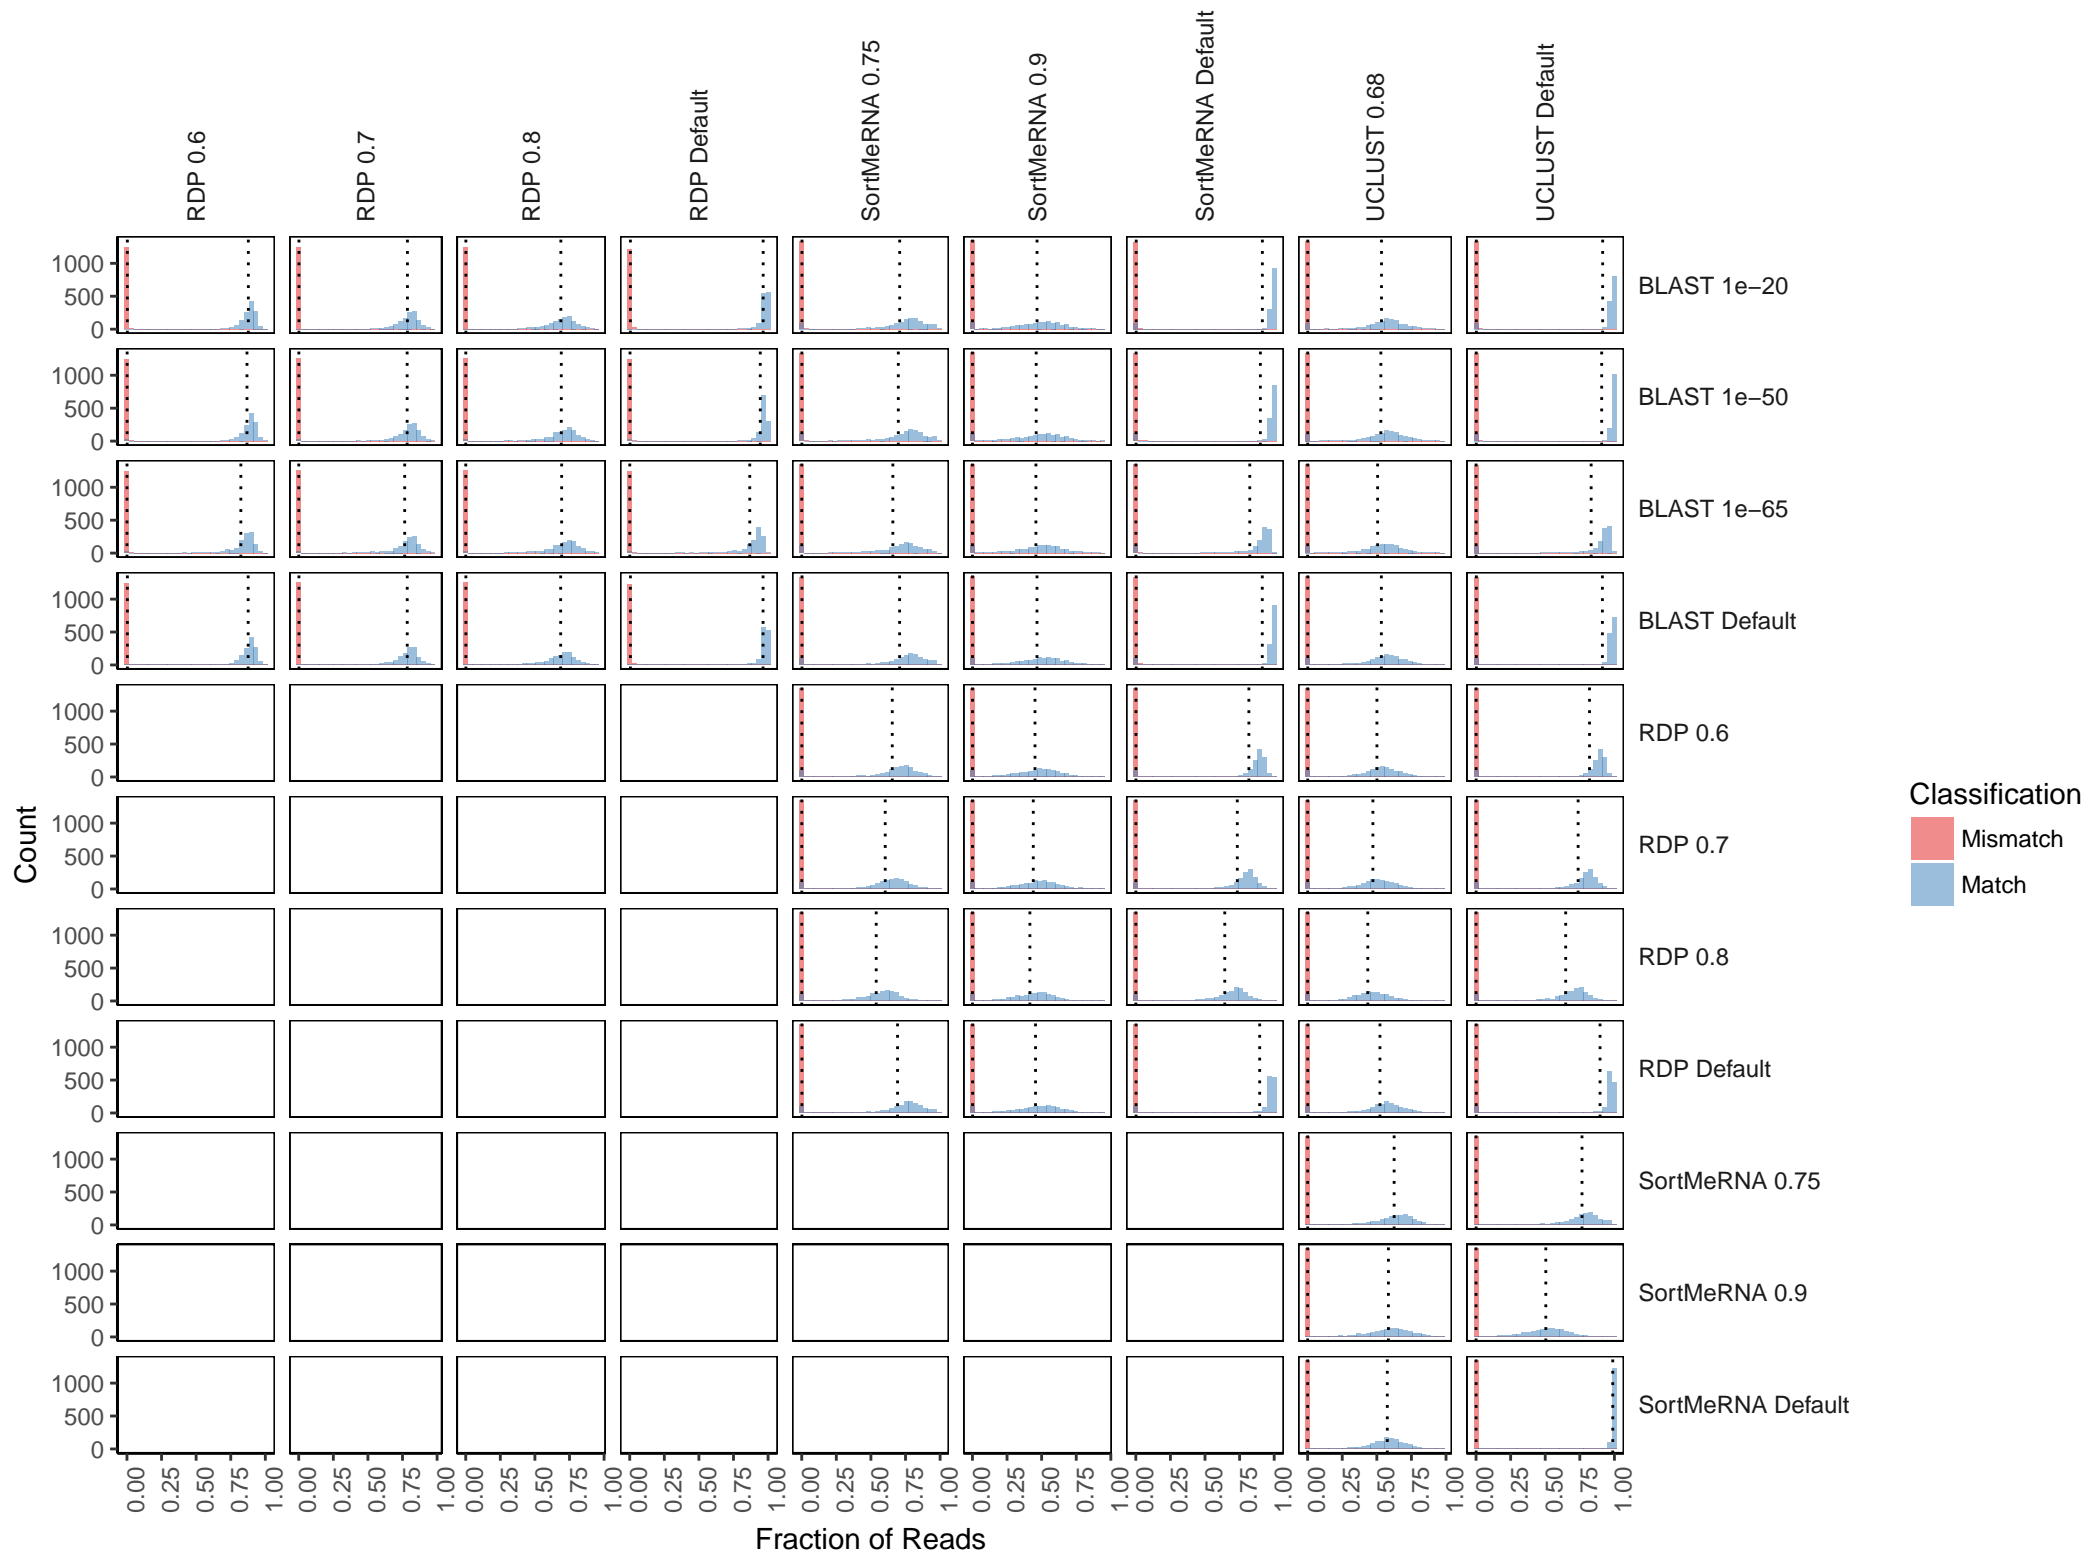

# Order Greengenes

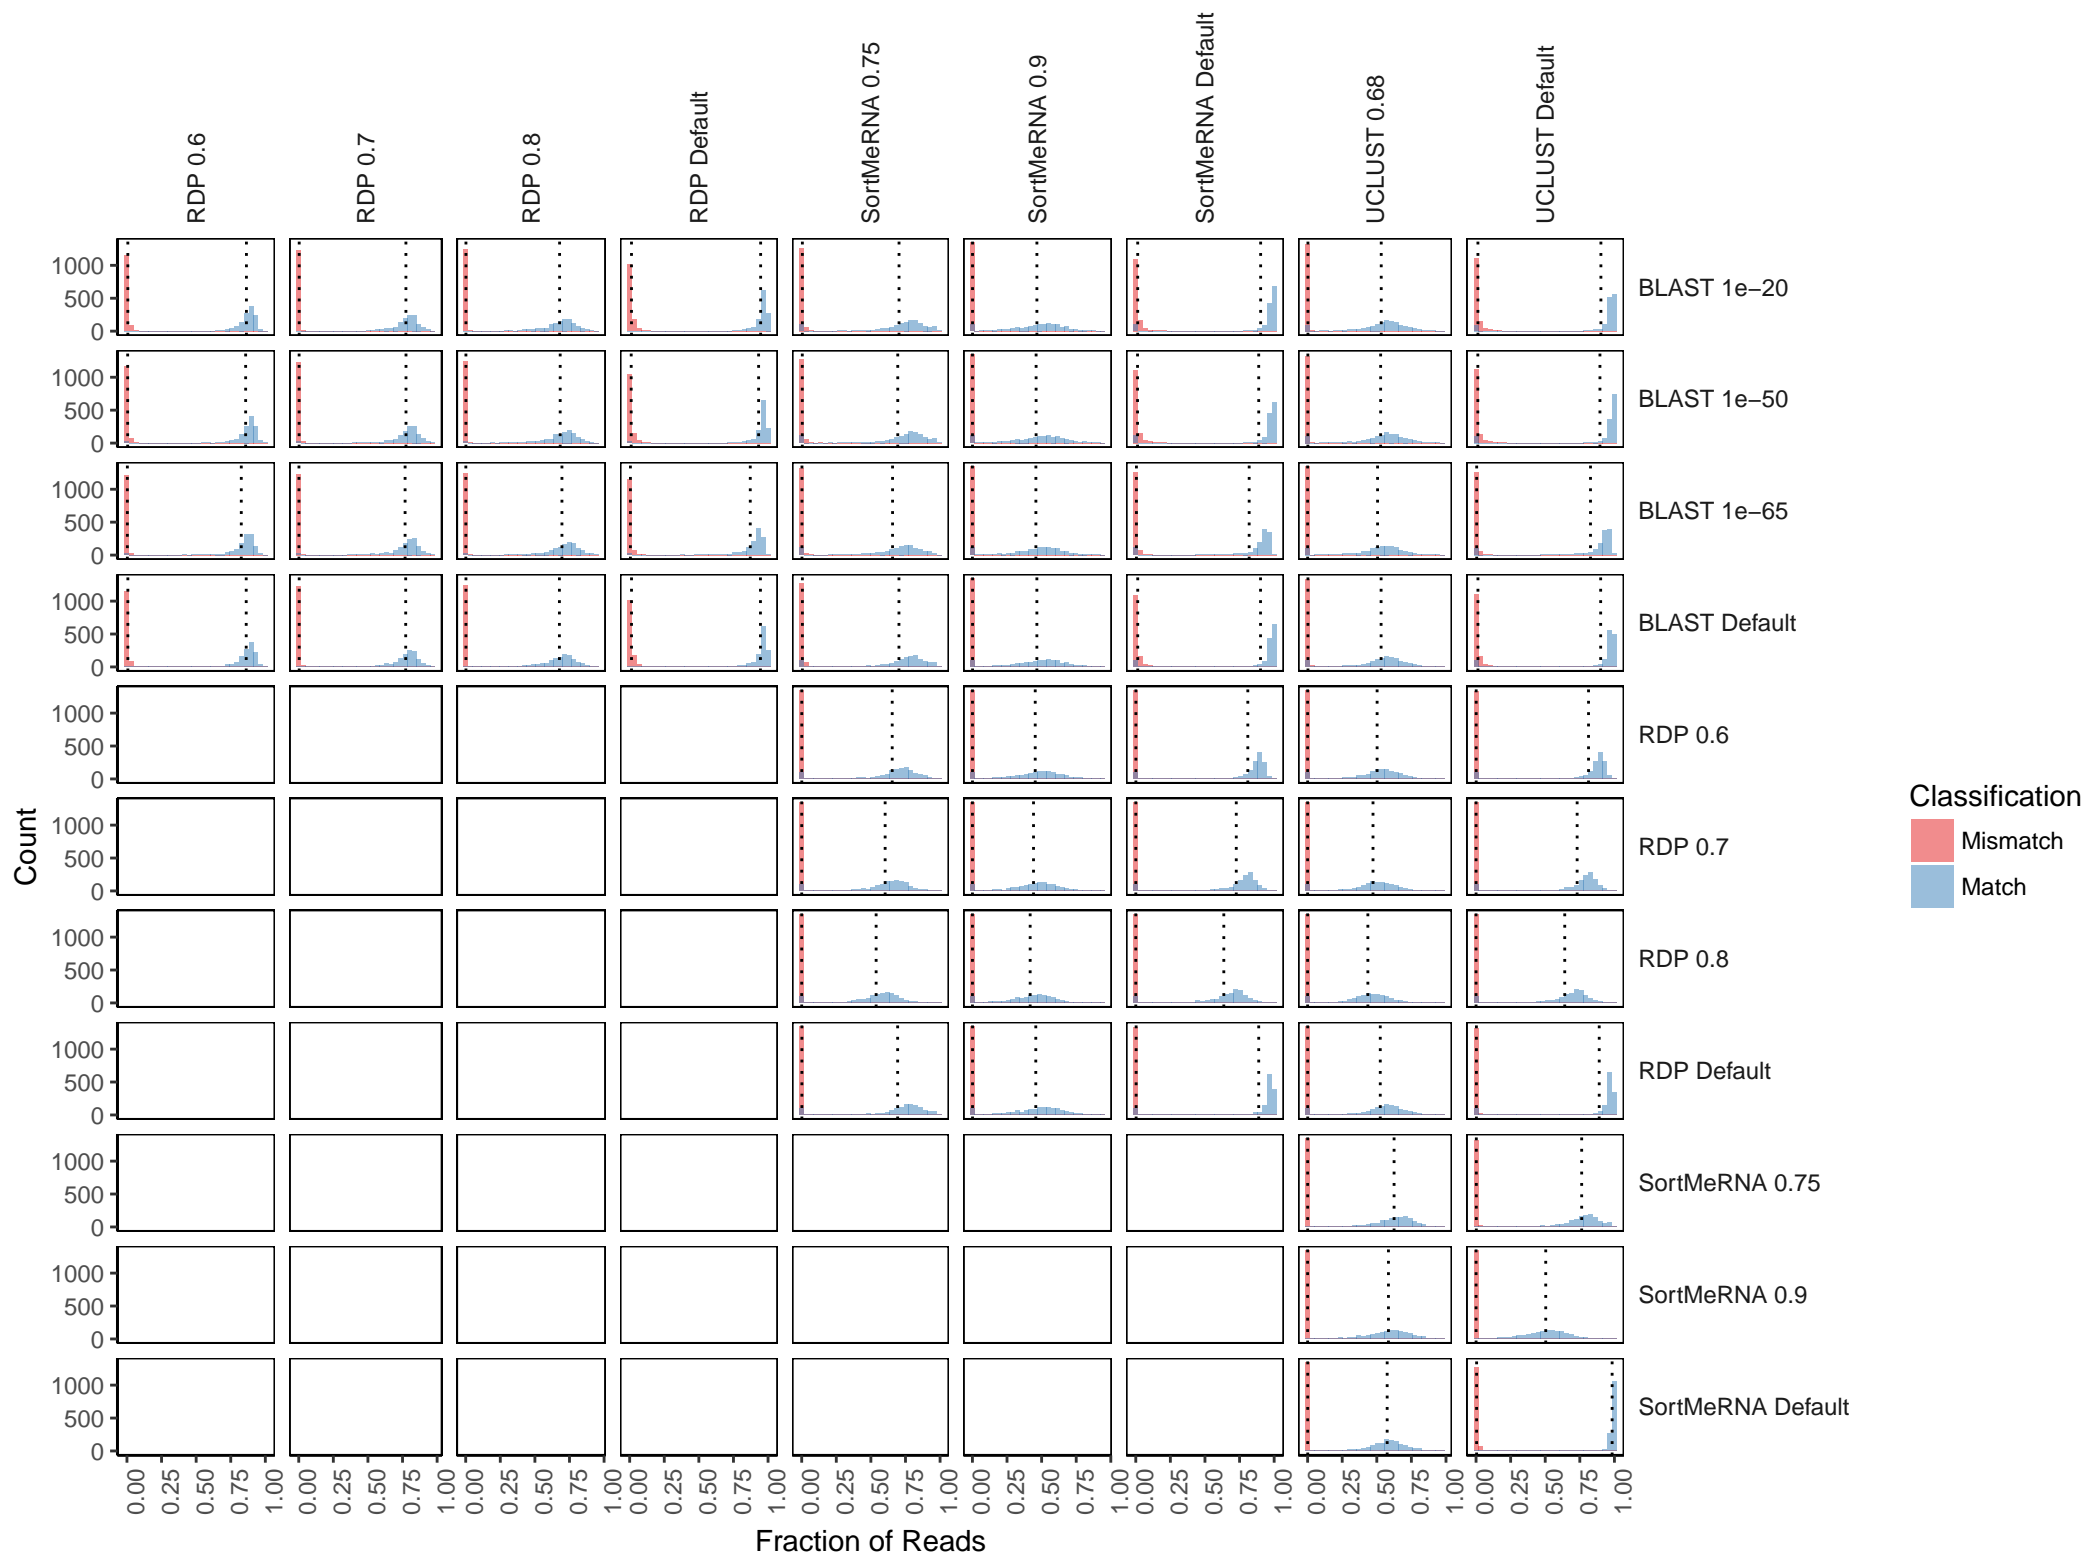

# Family Greengenes

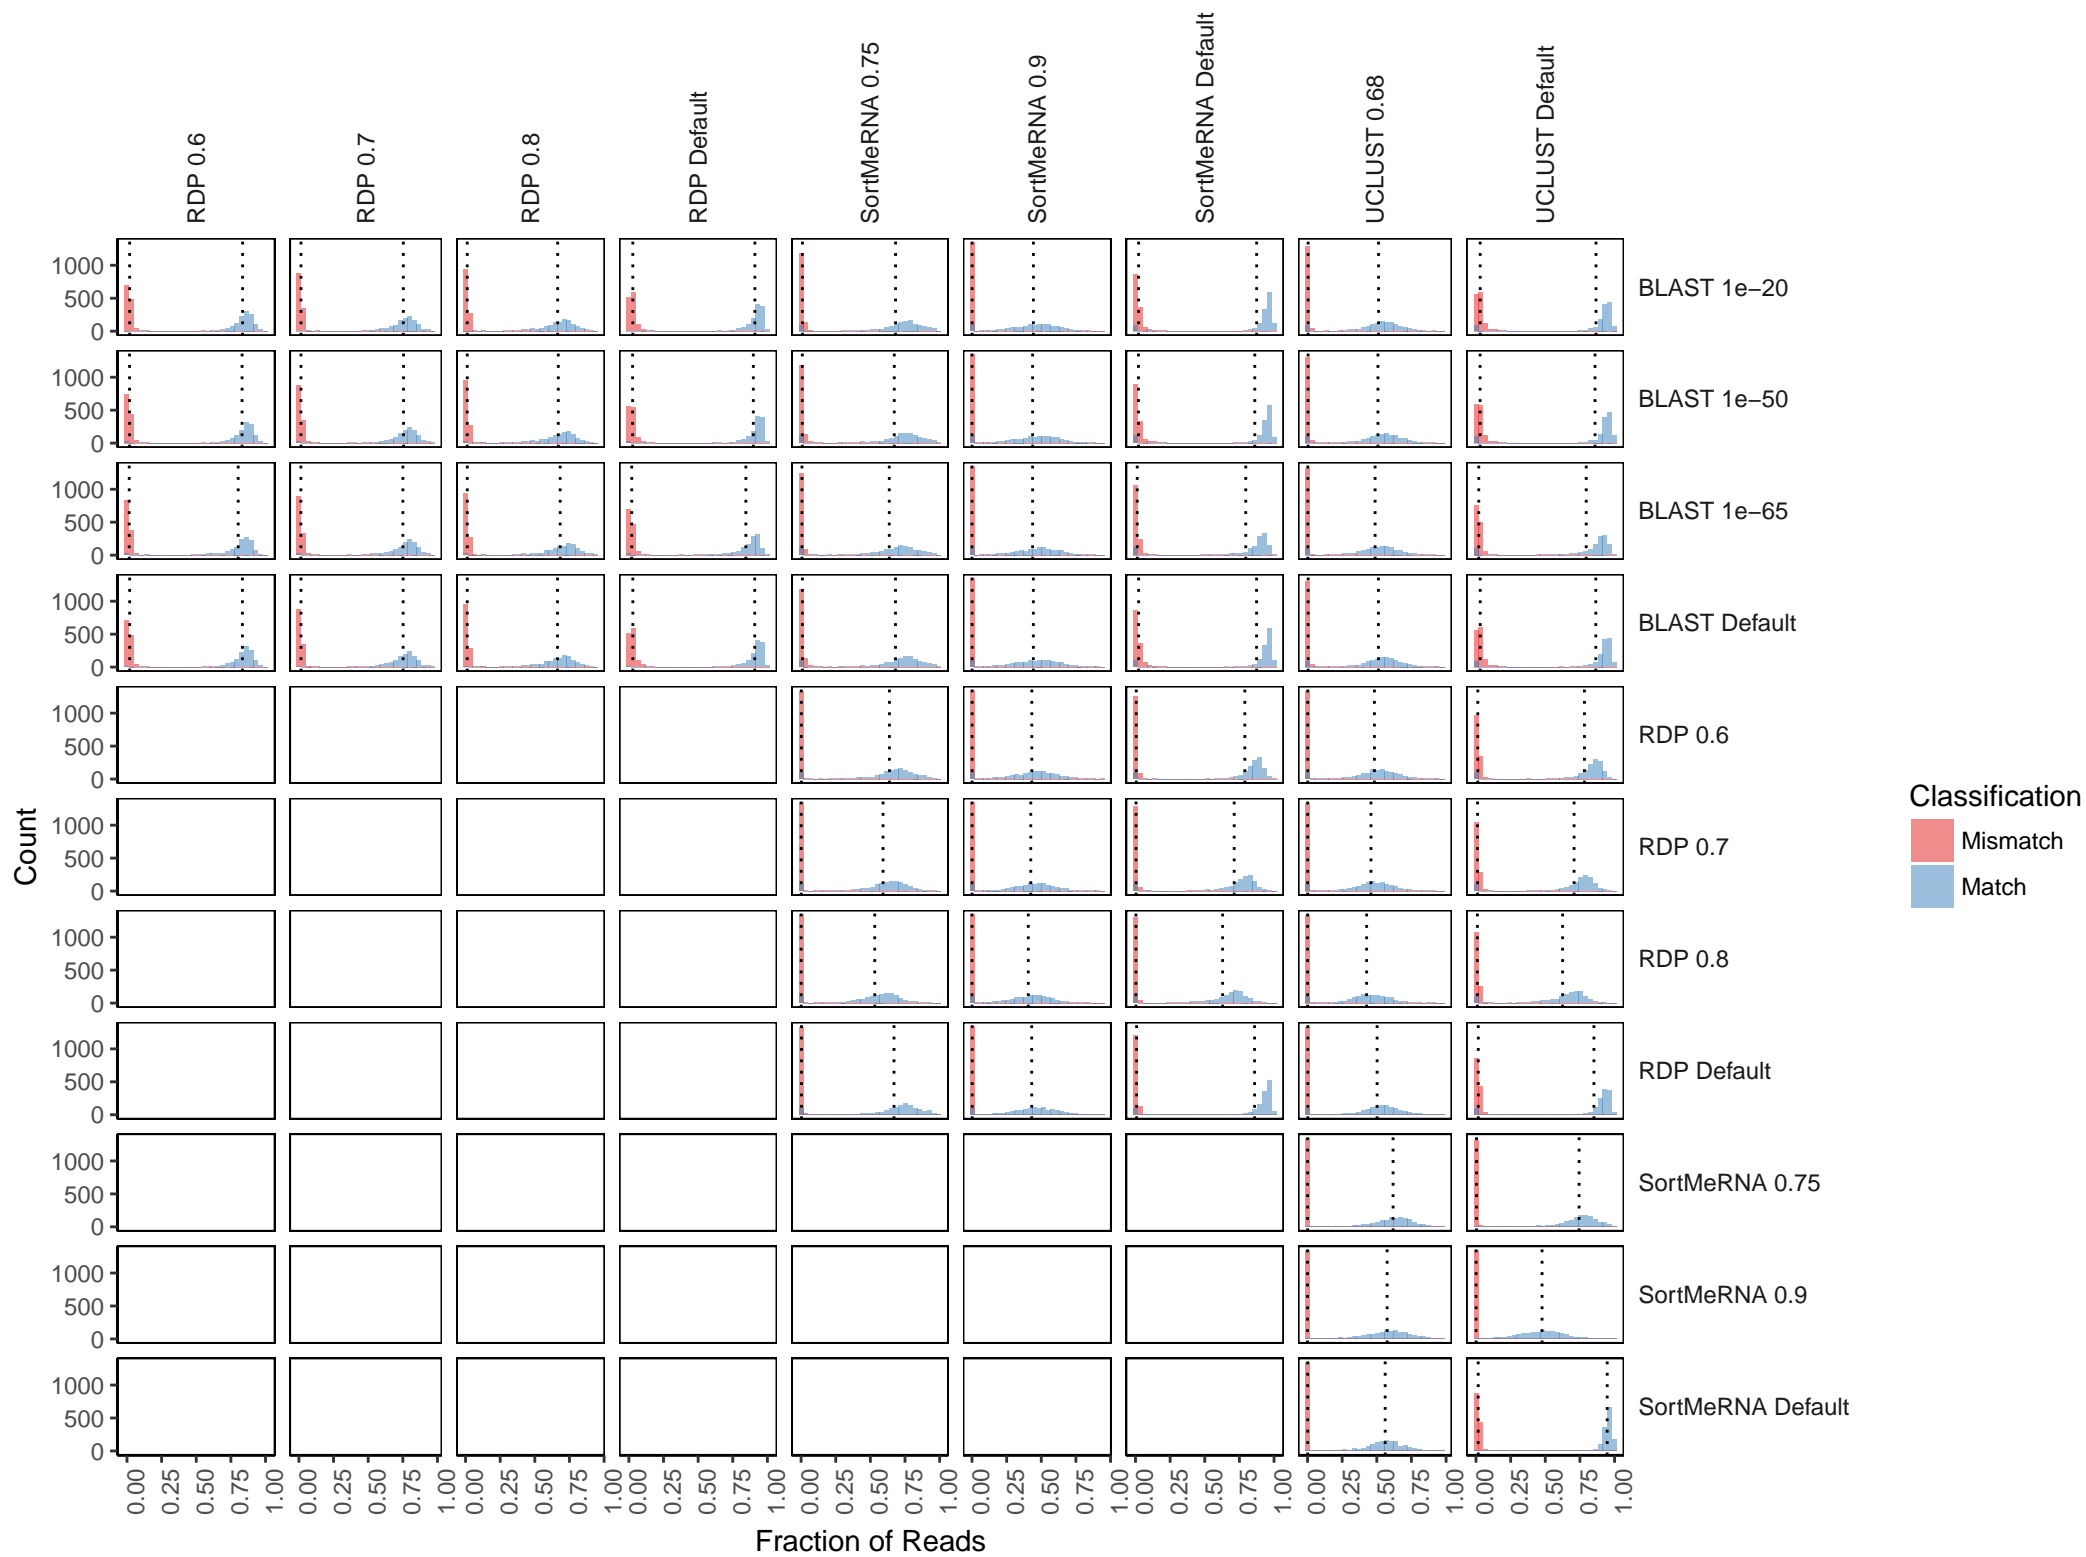

# Genus Greengenes

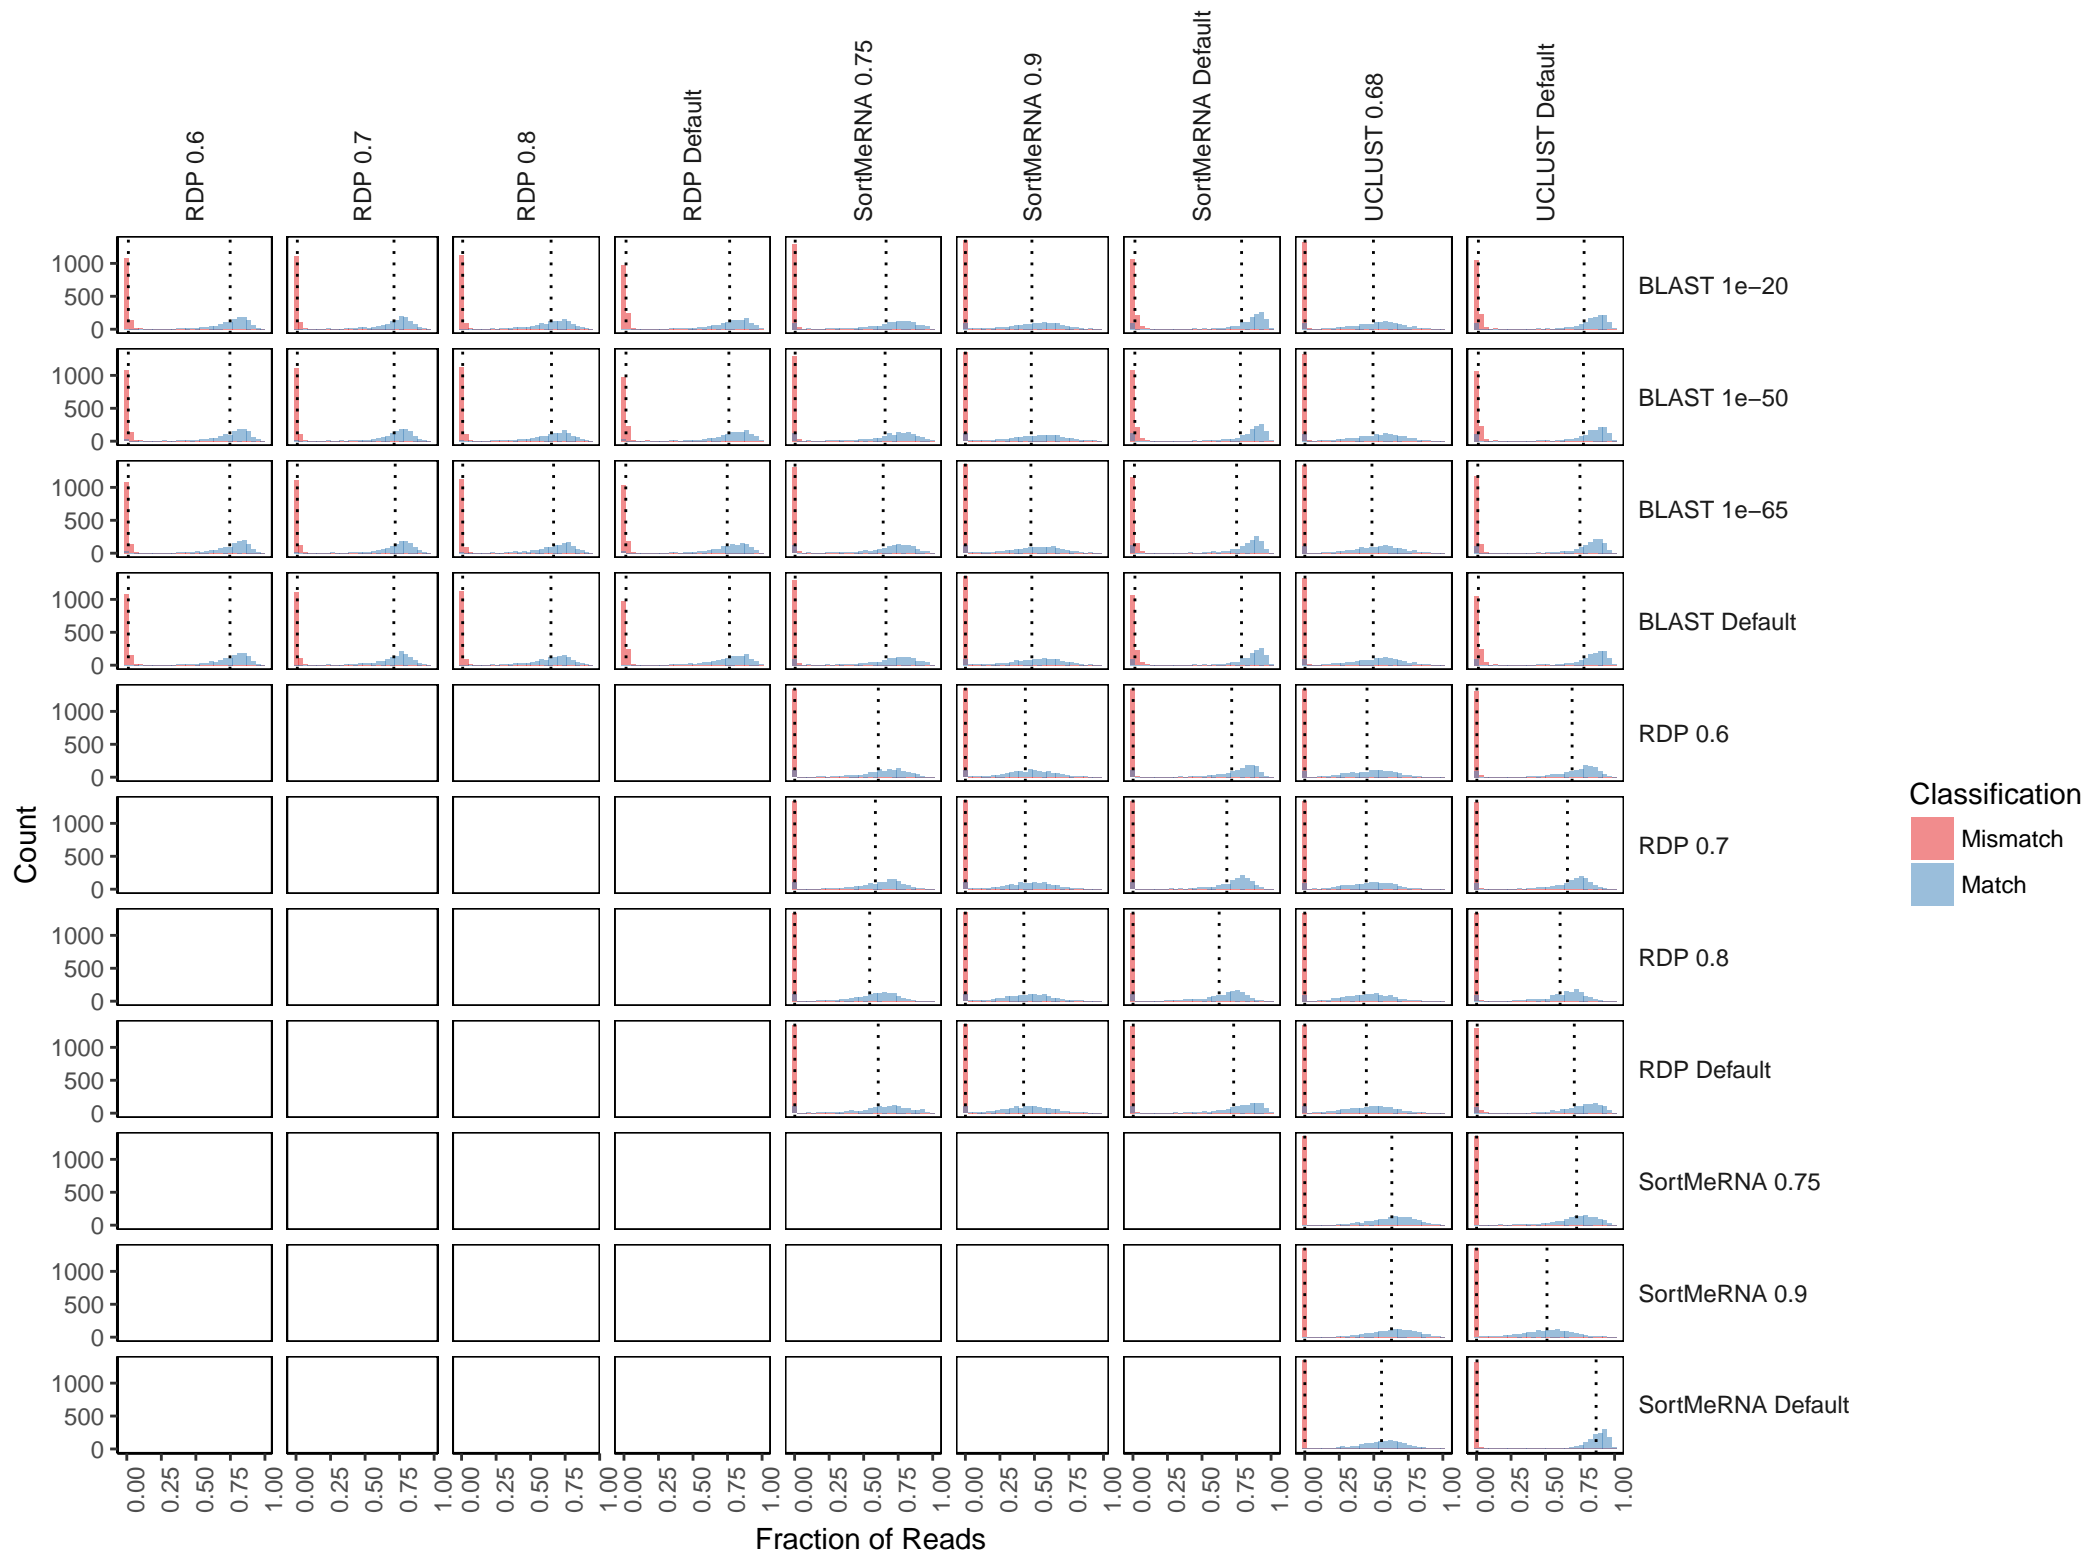

# Species Greengenes

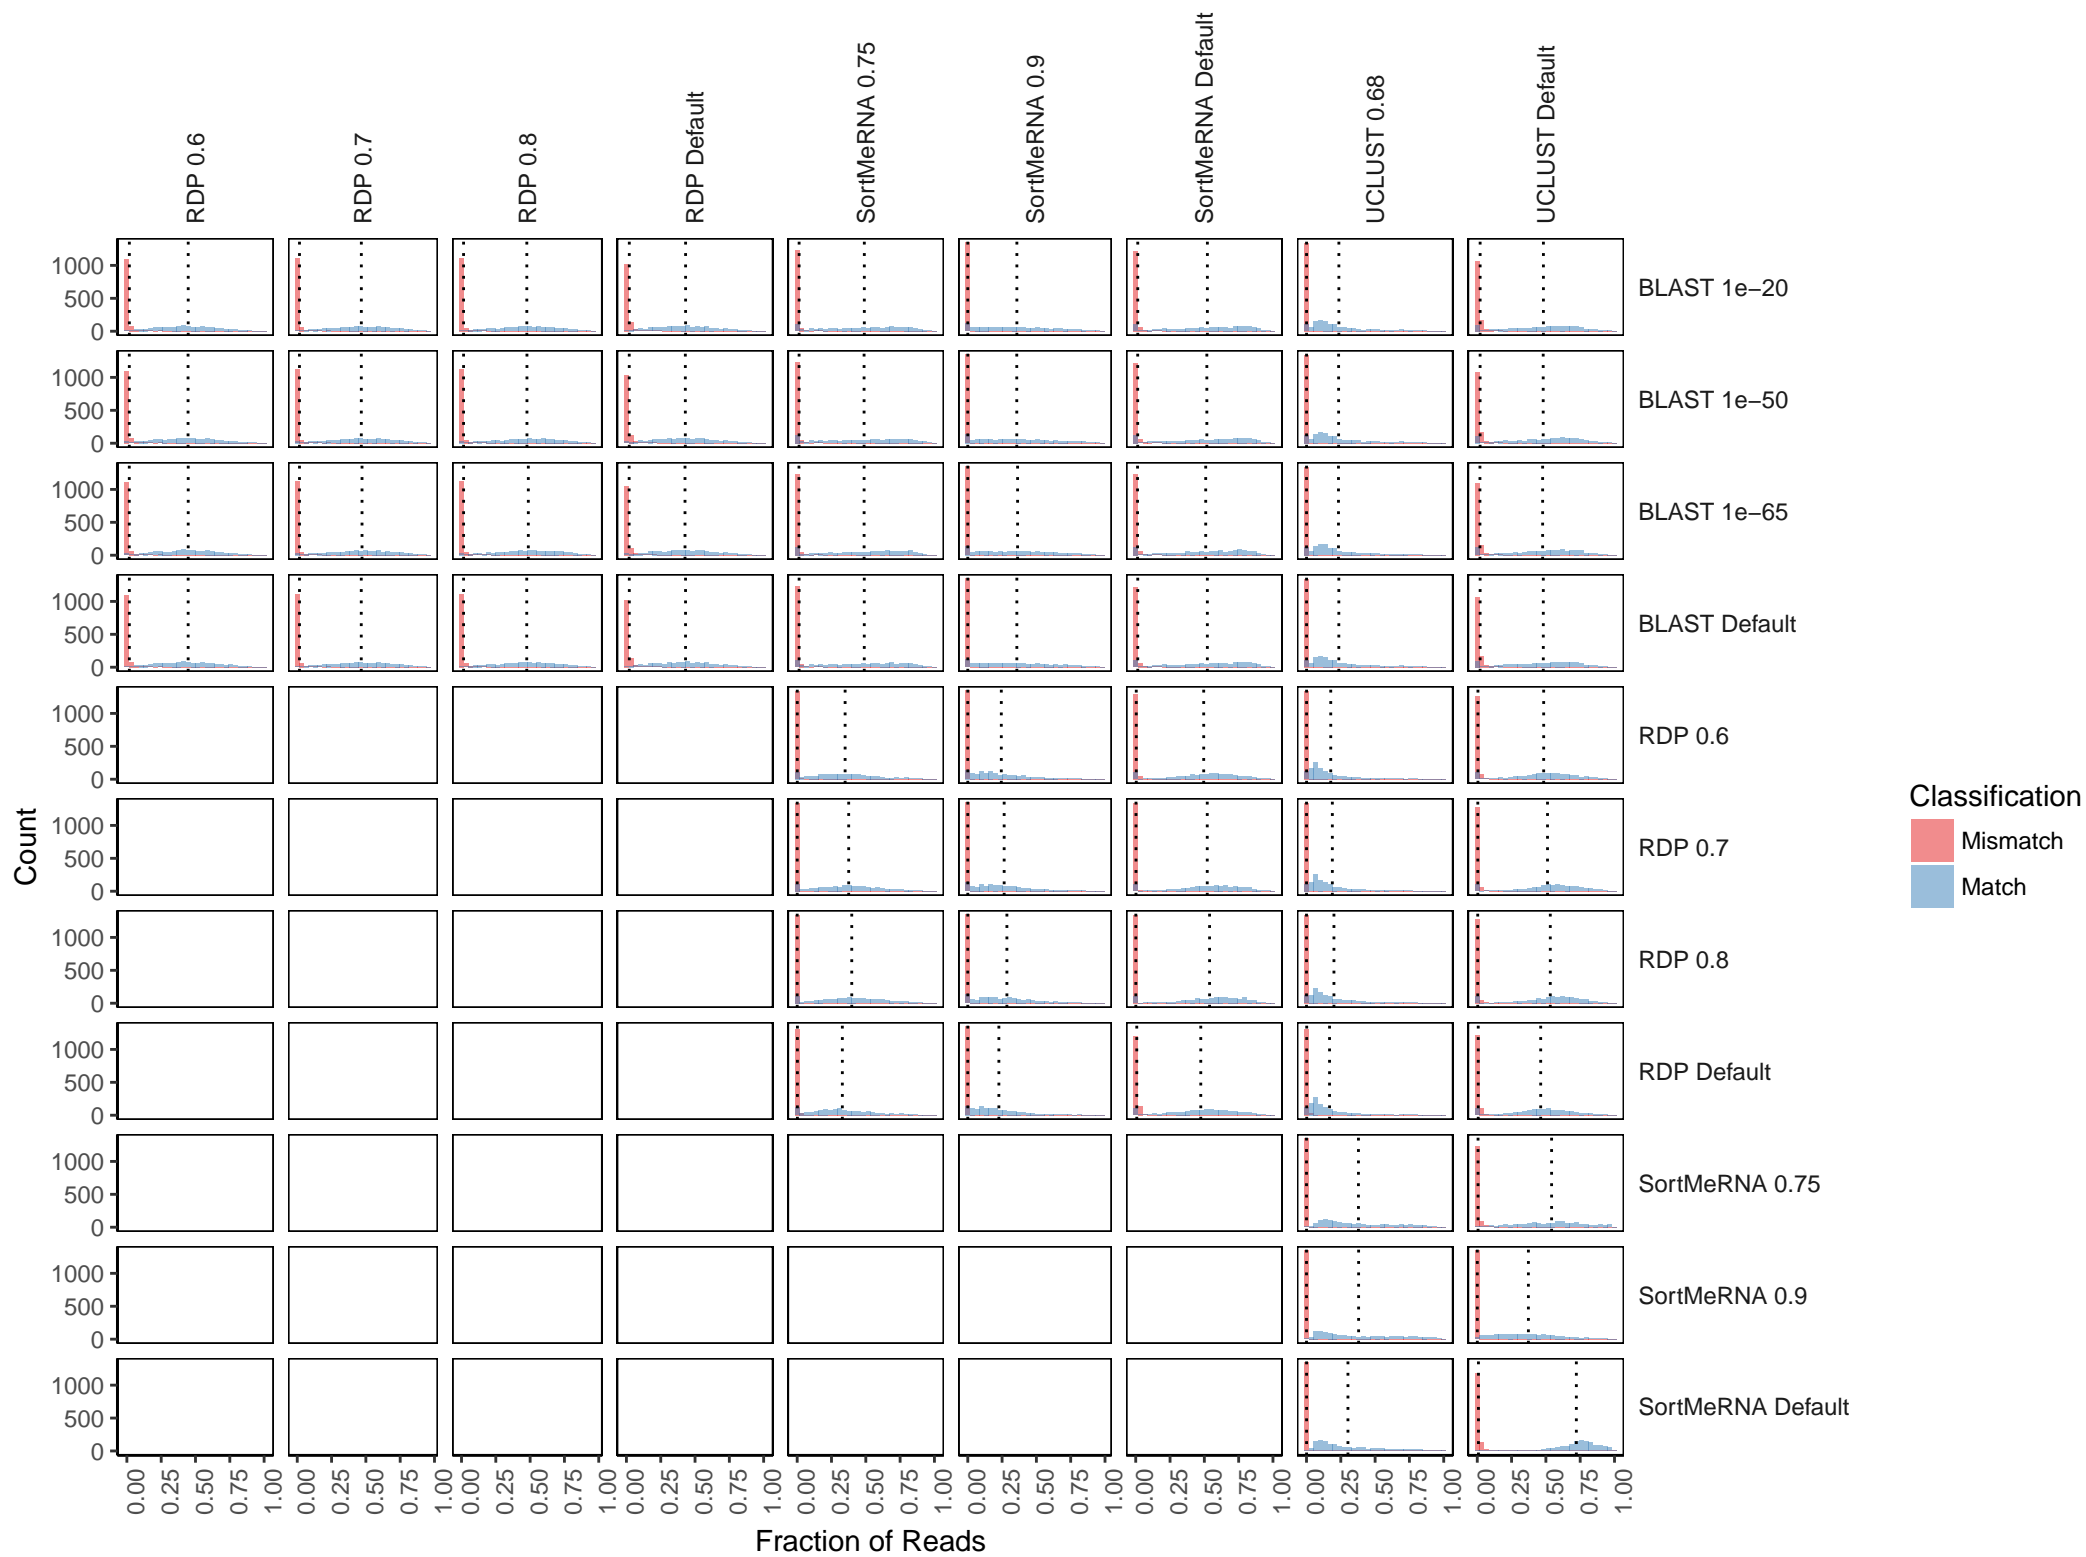

# Phylum HITdb

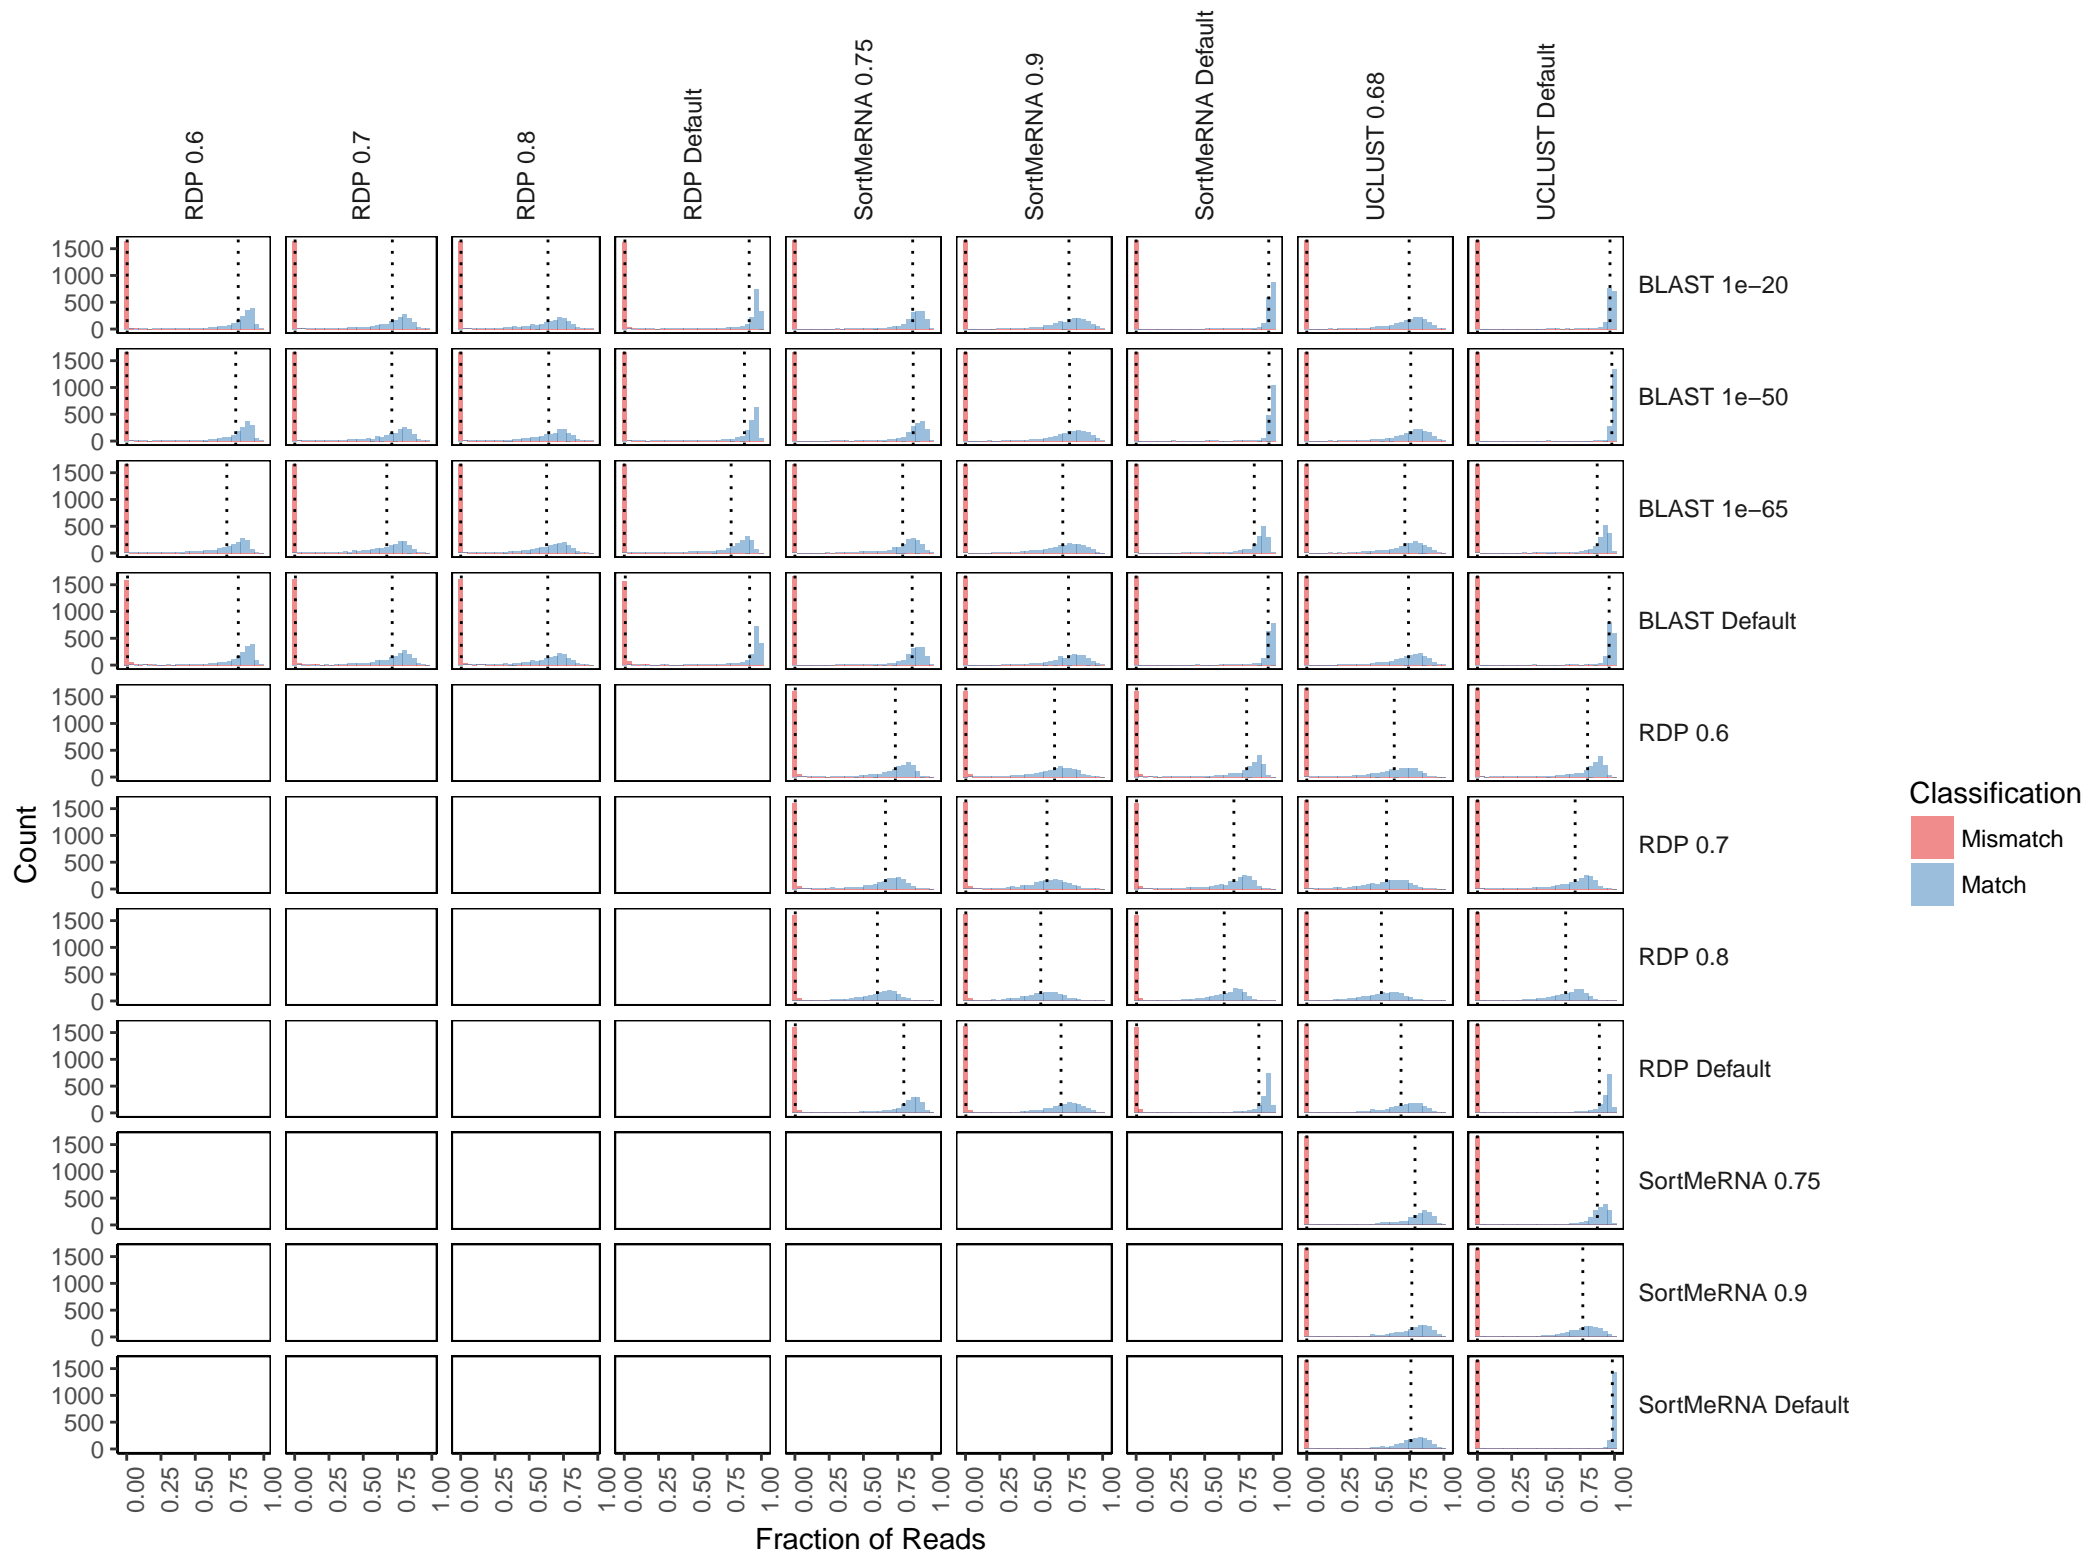



# Class HITdb

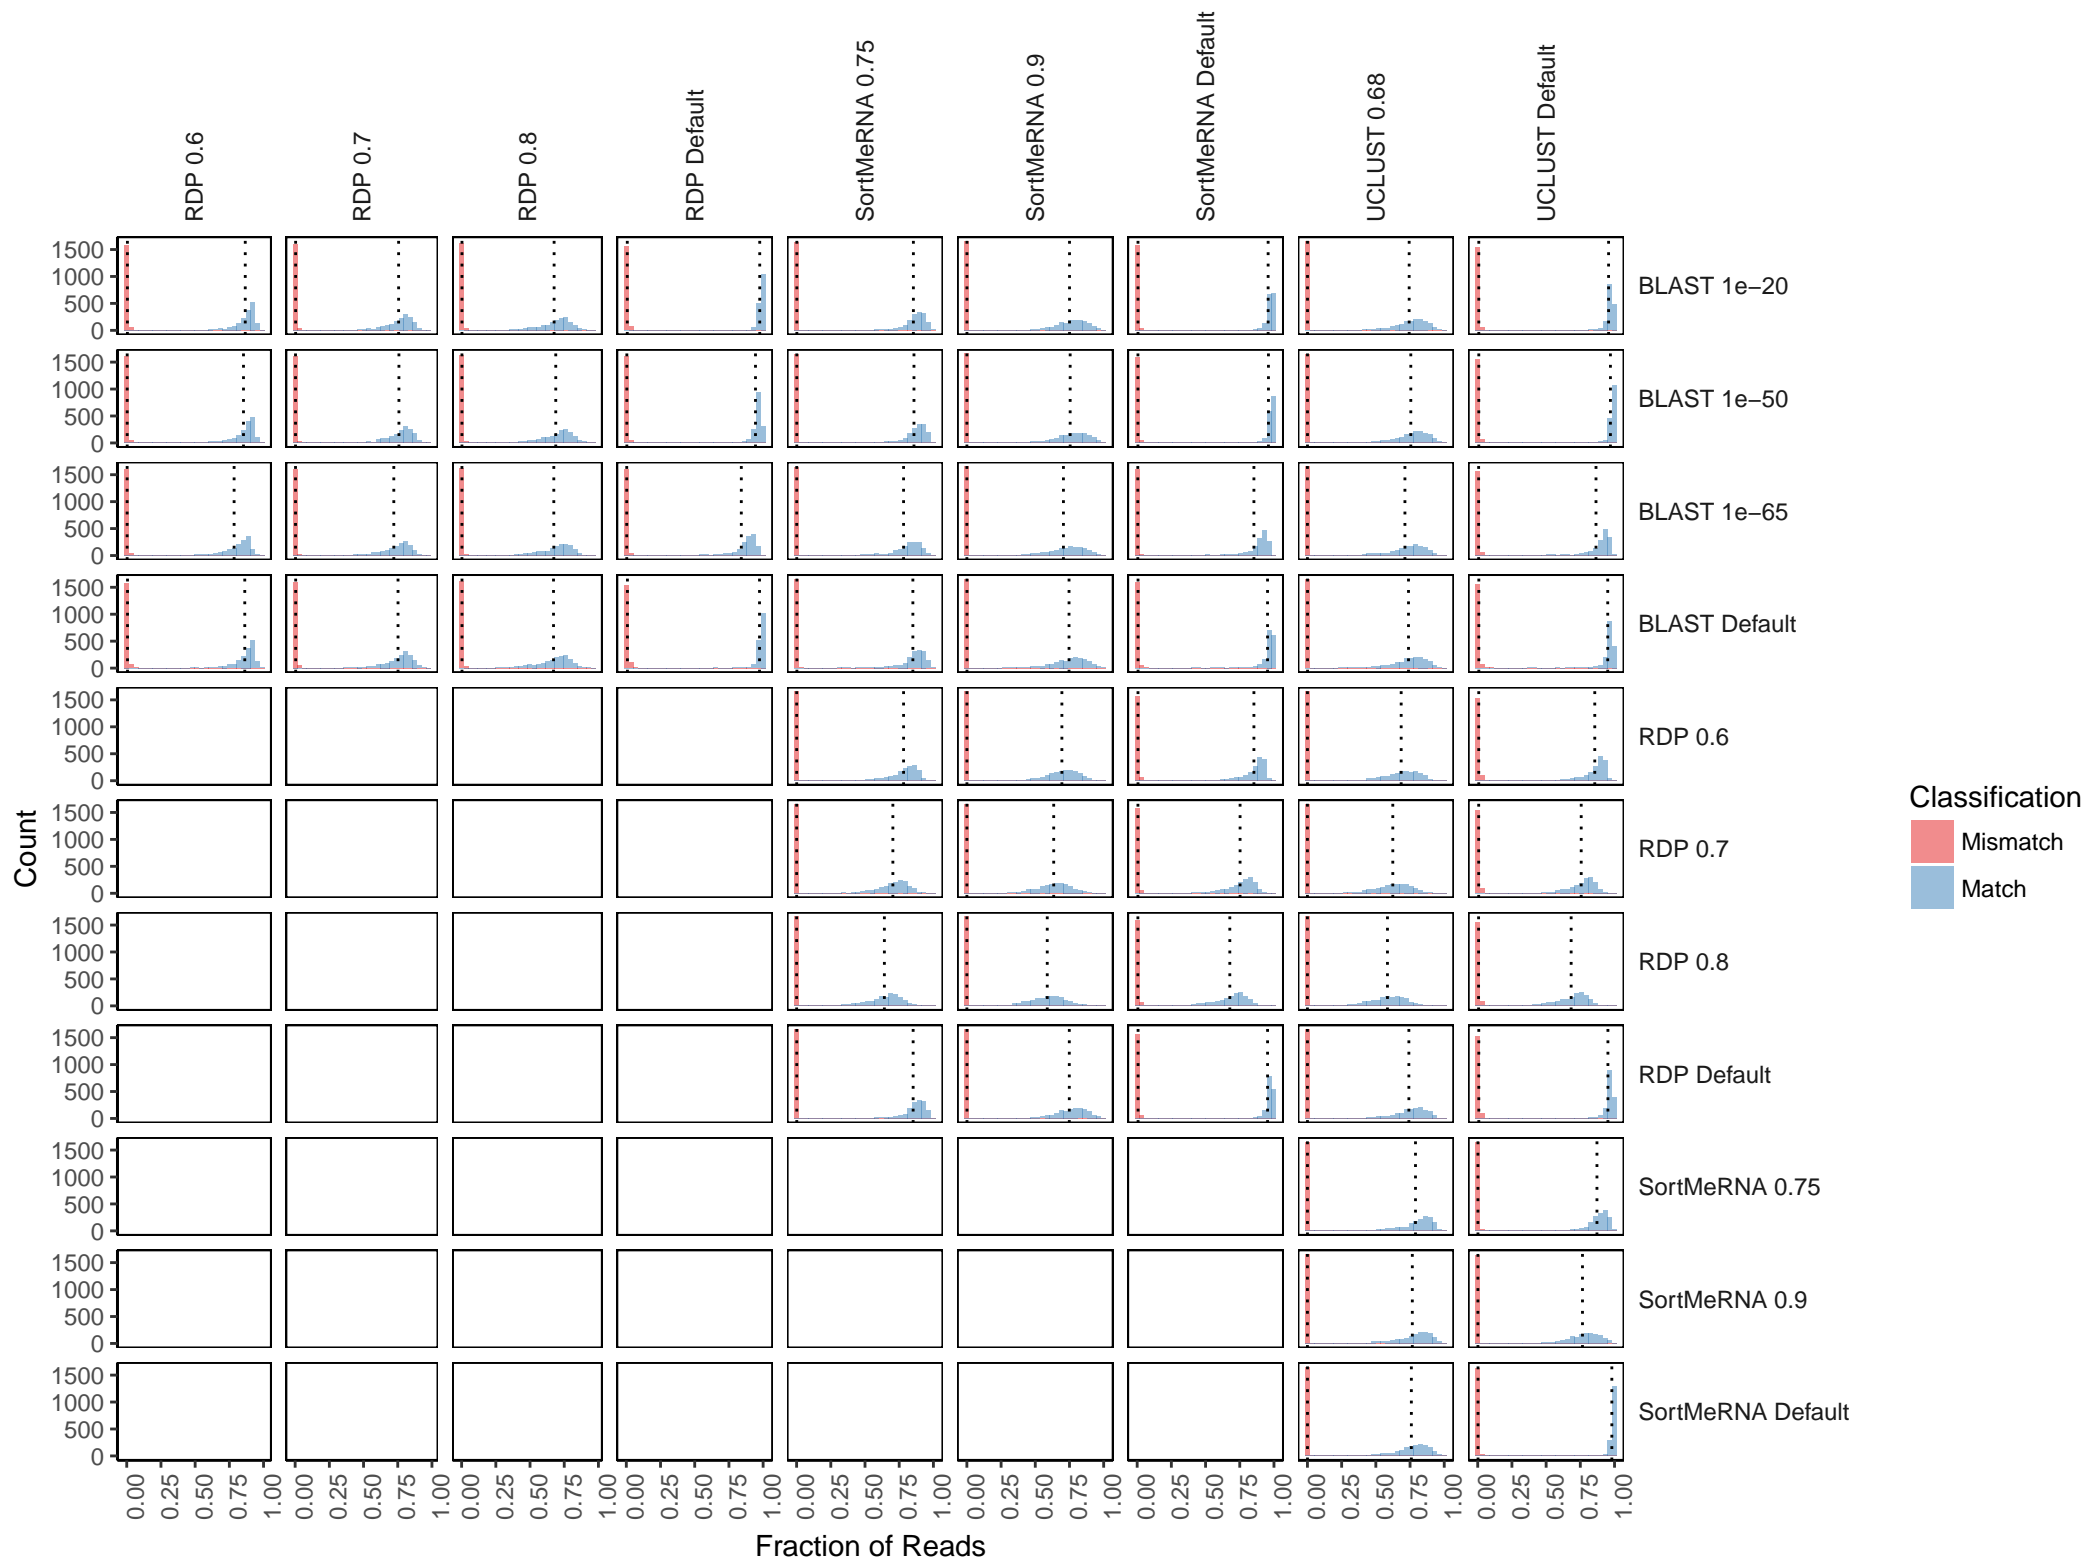

# Order HITdb

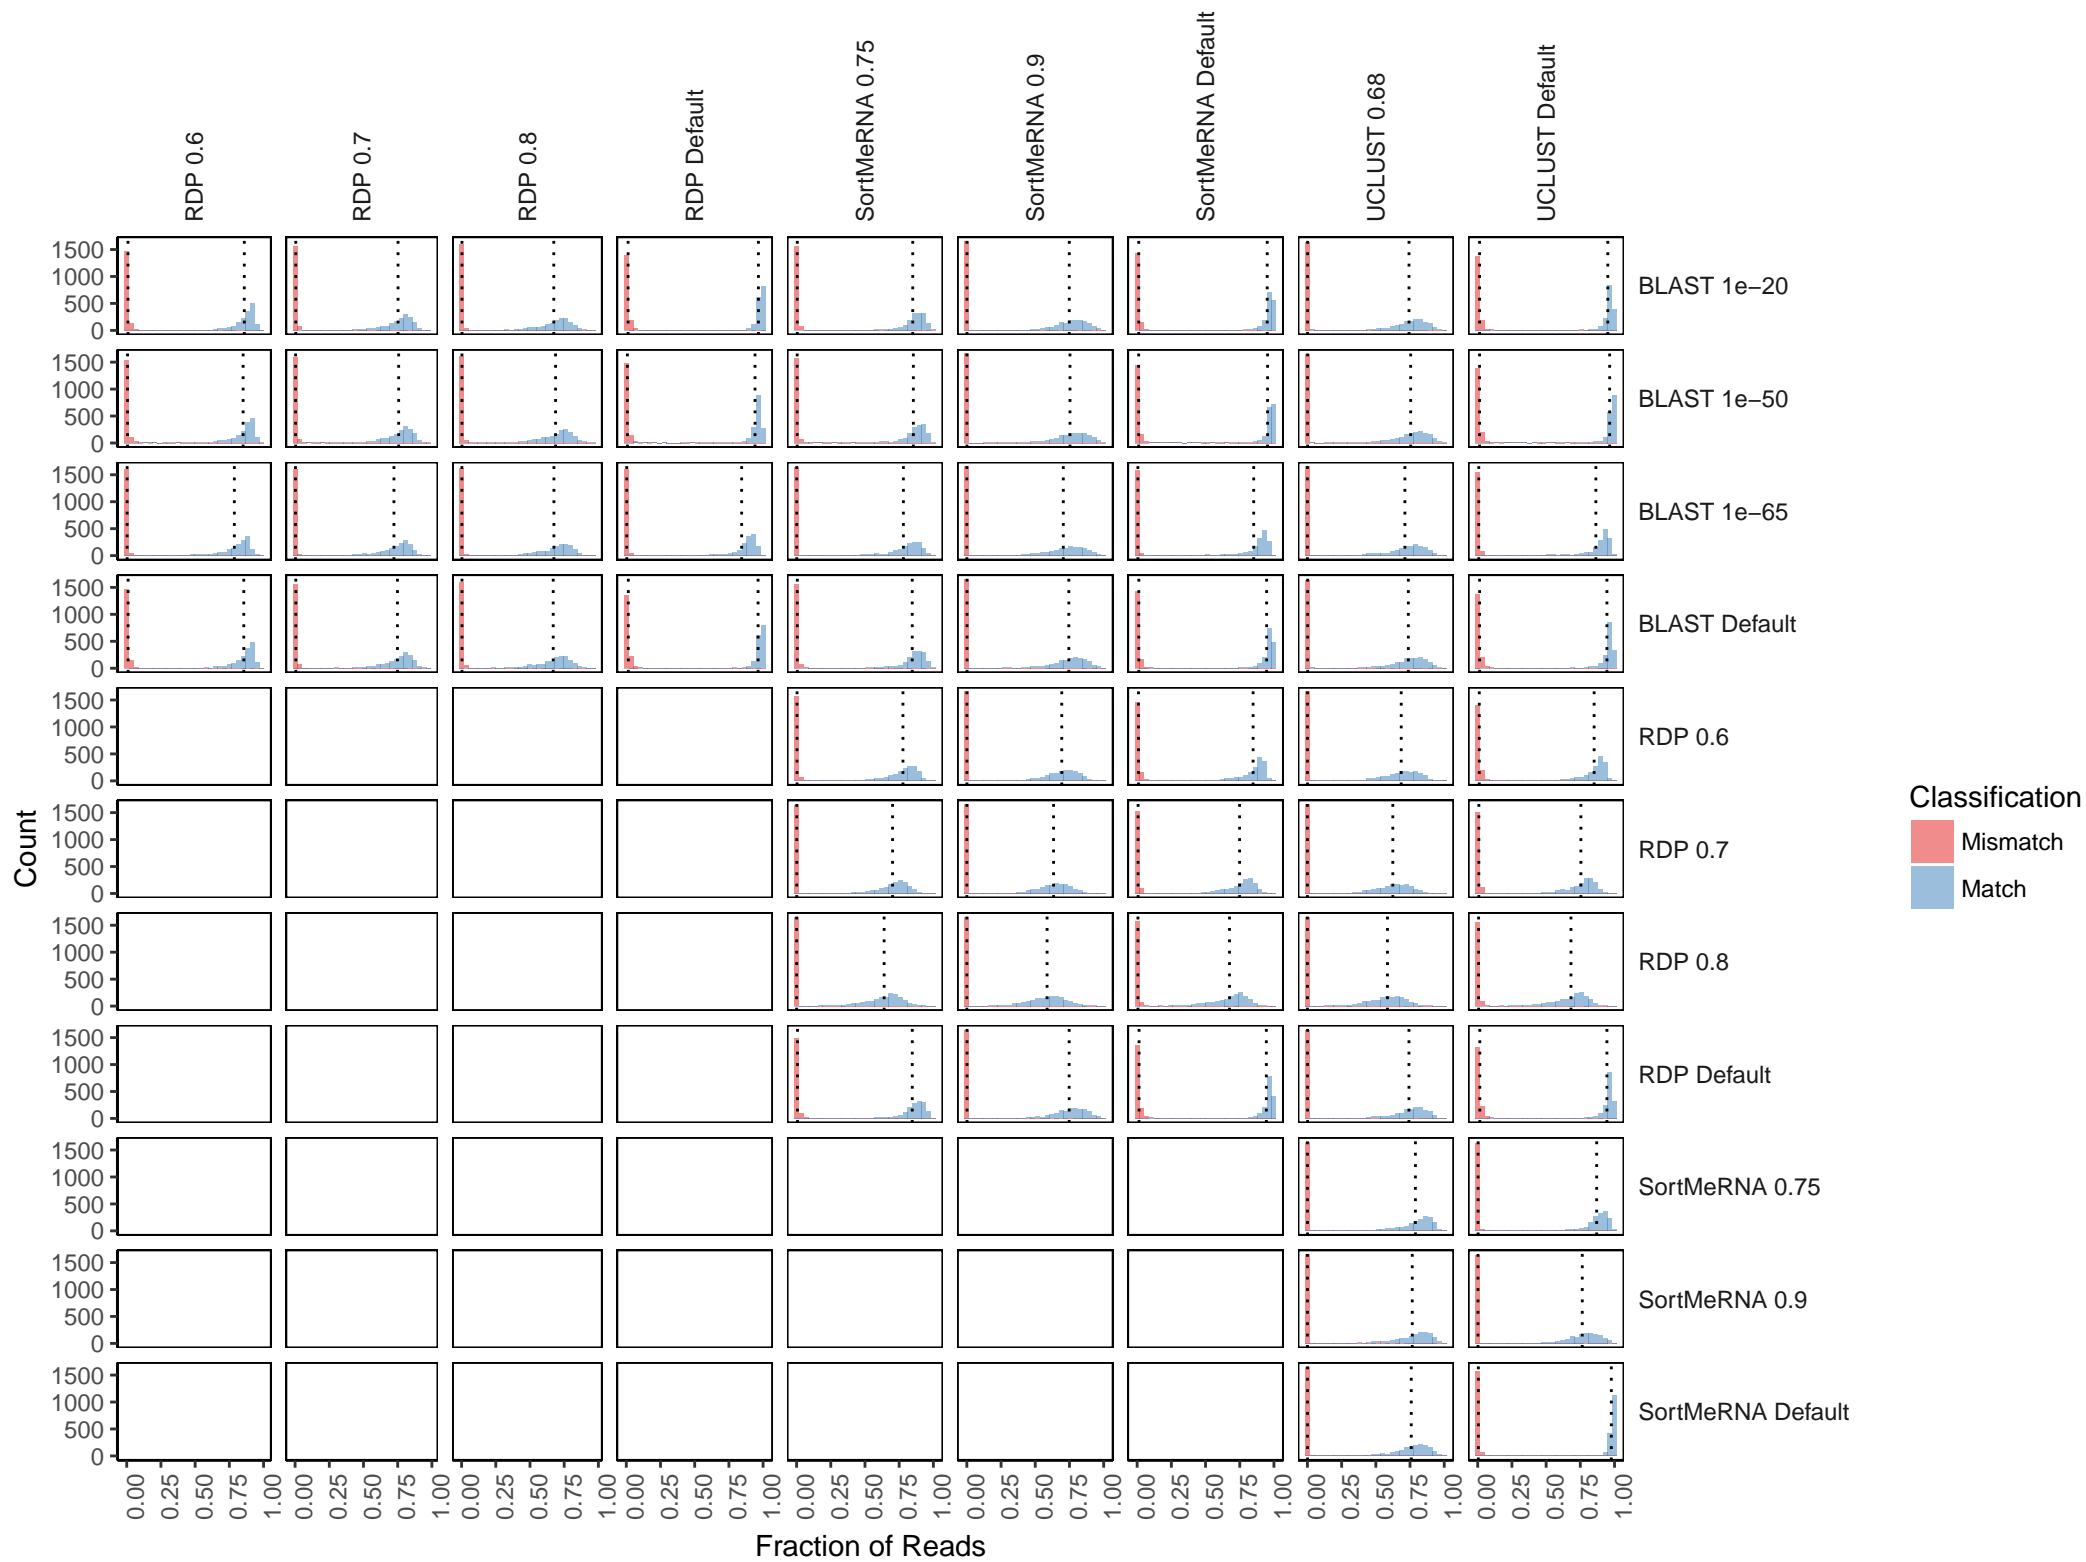

# Family HITdb

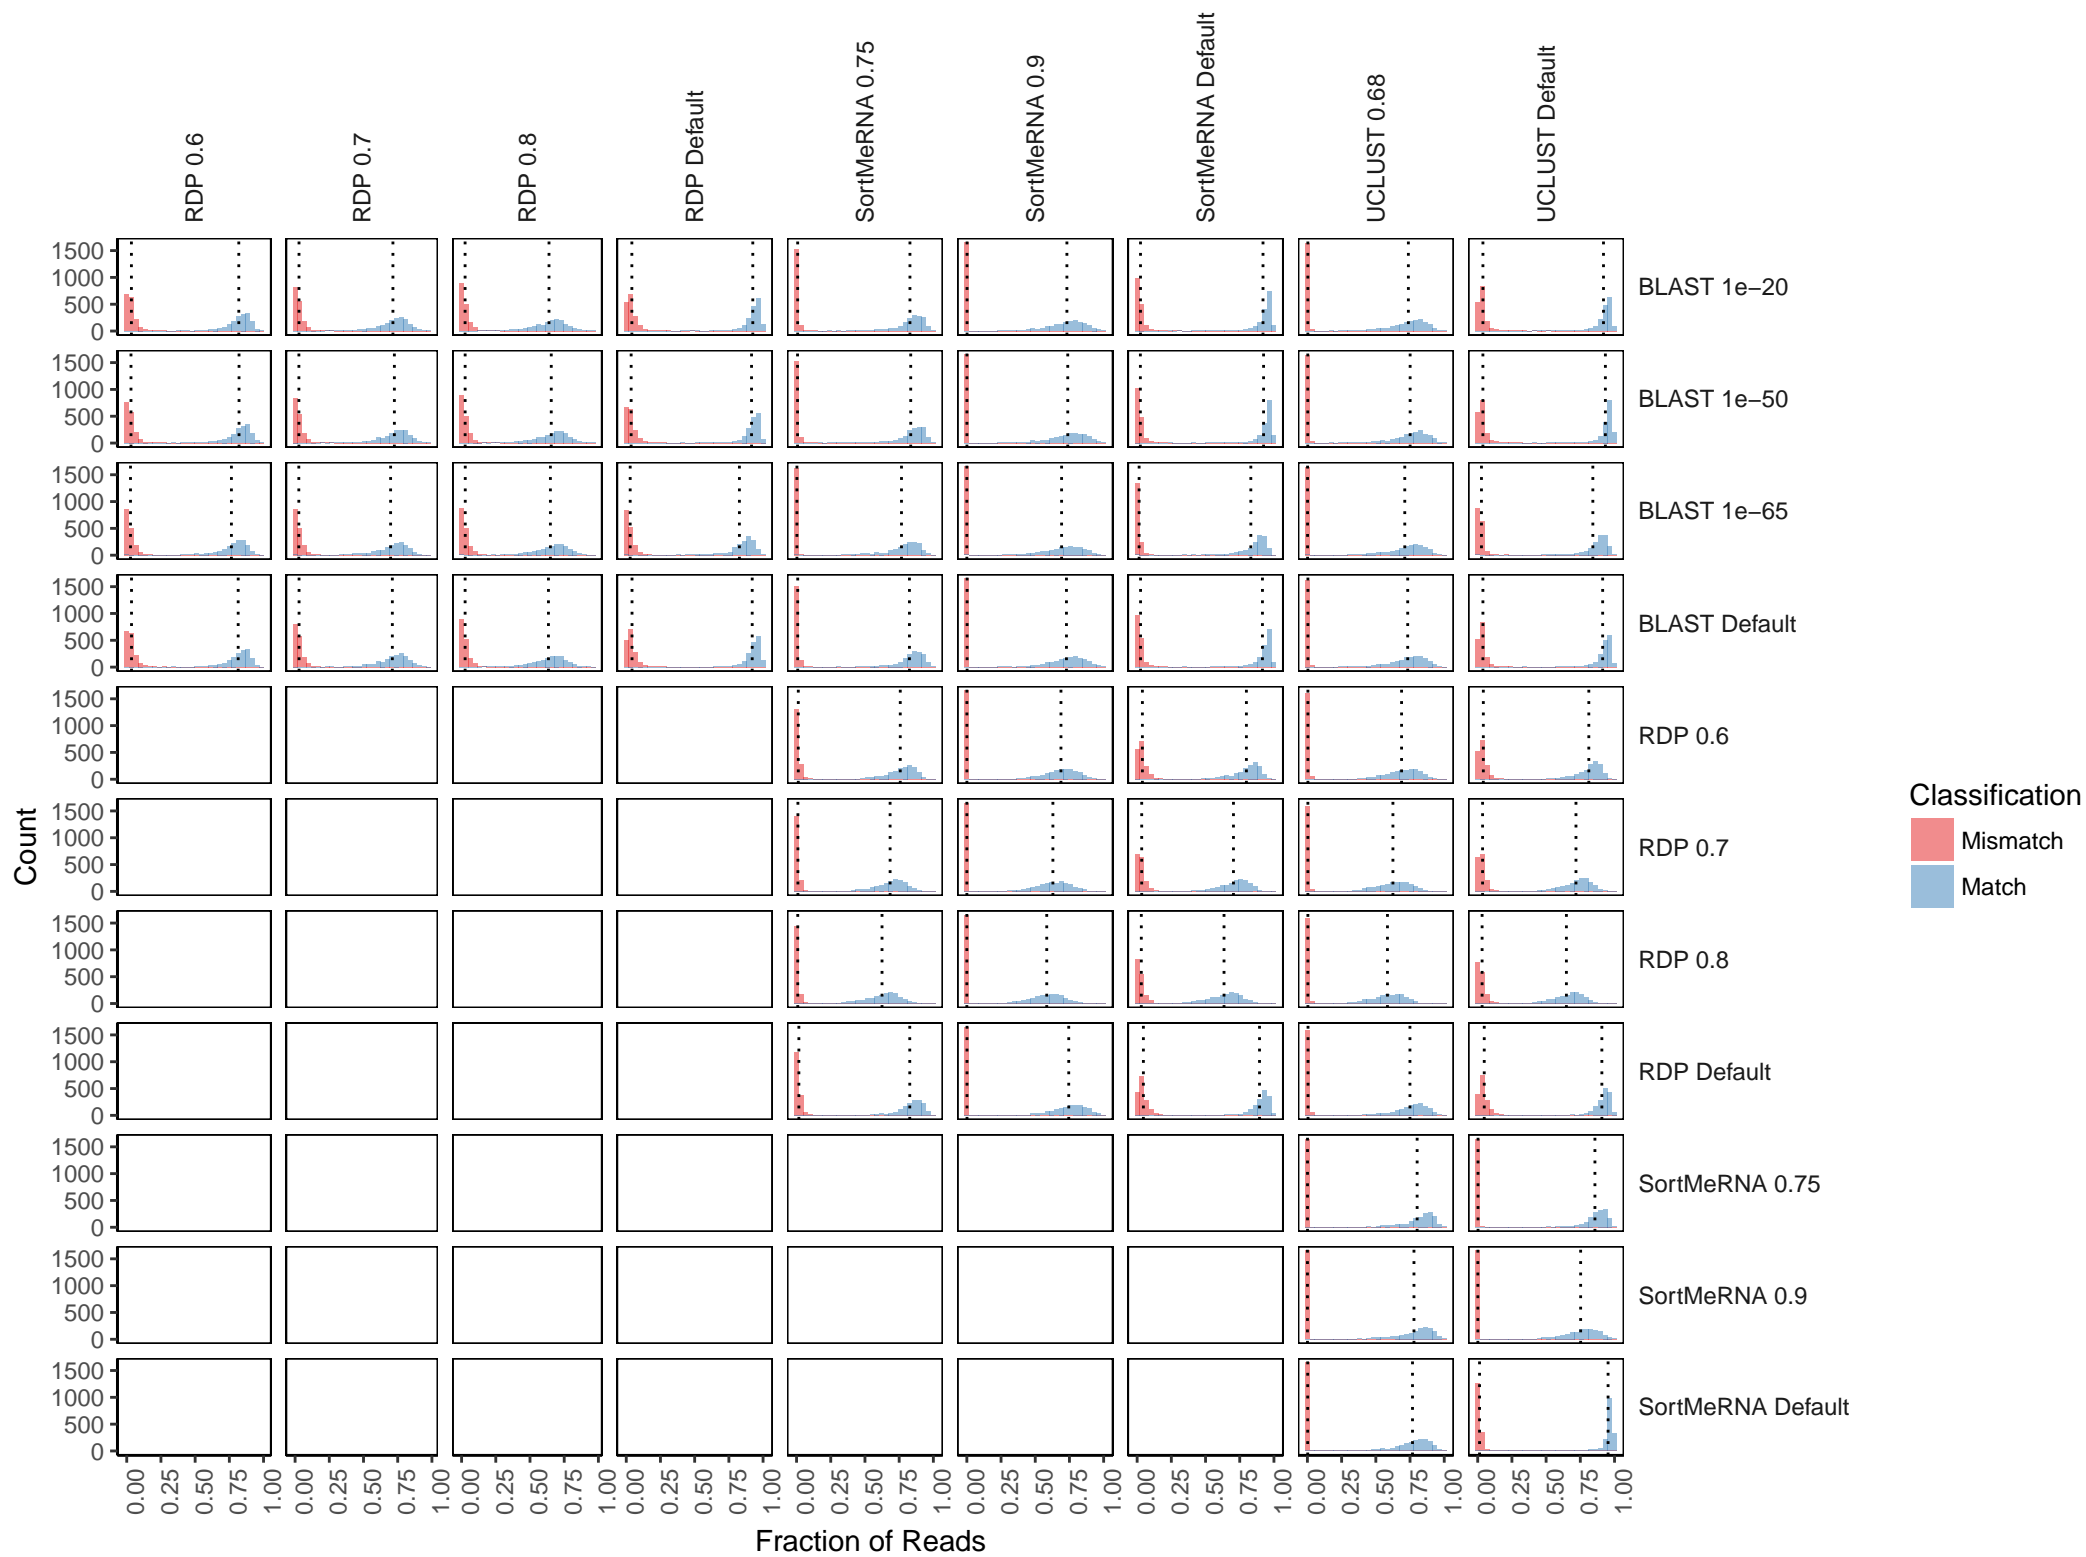

# Genus HITdb

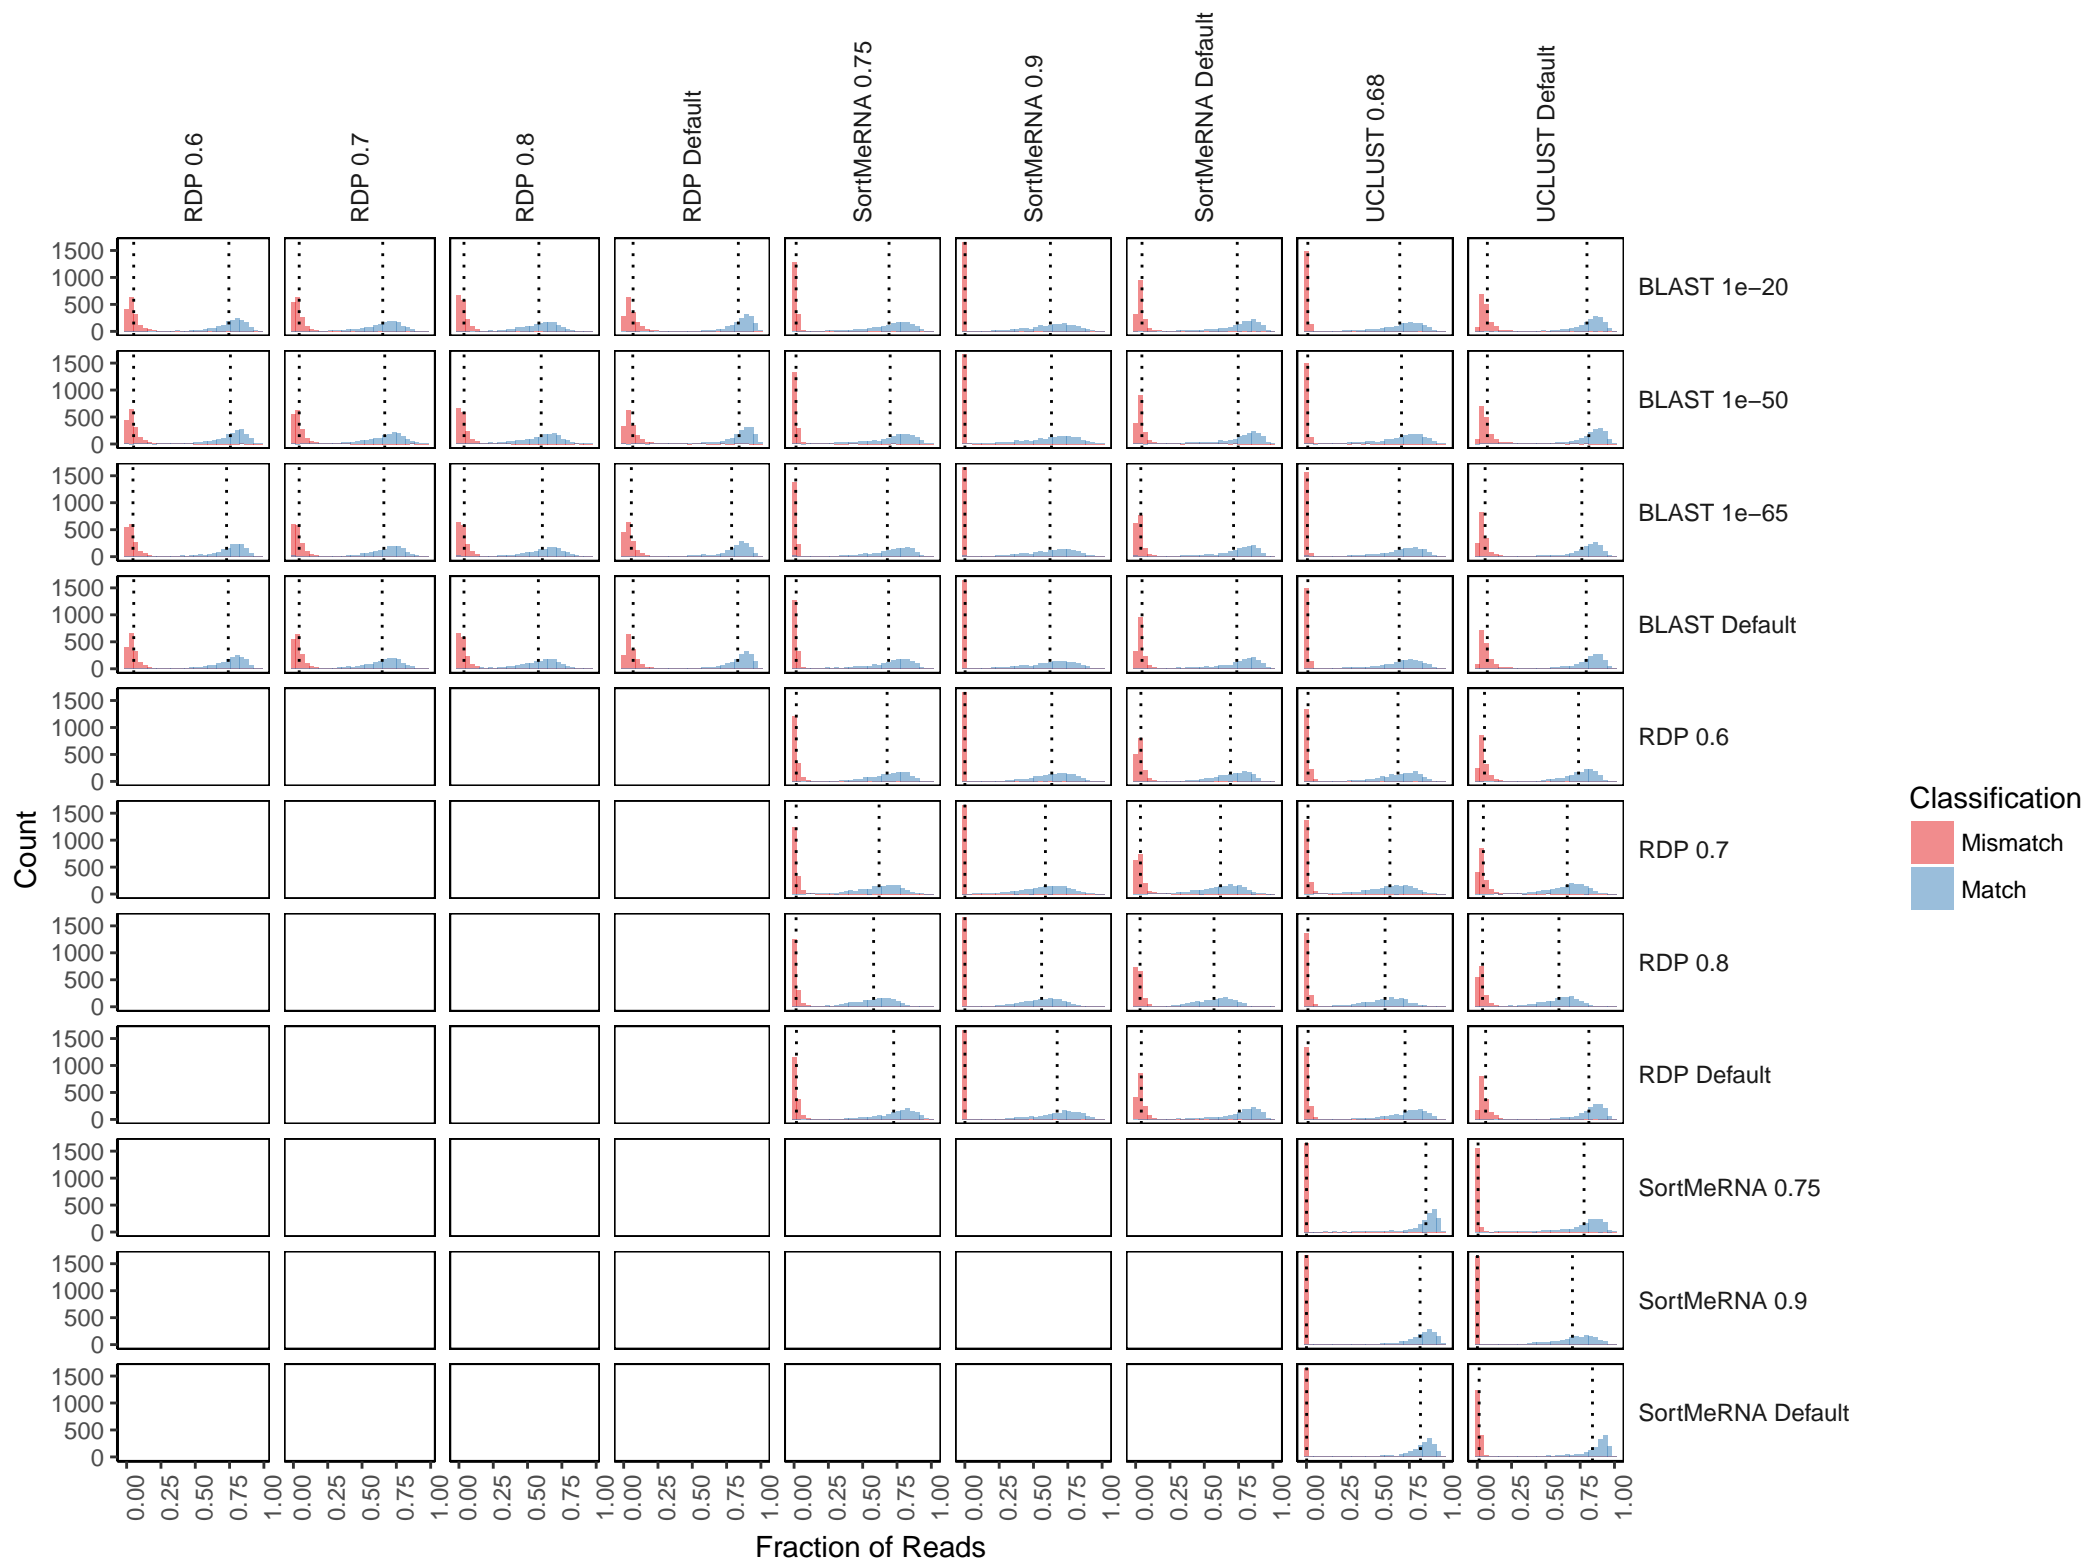

# Species HITdb

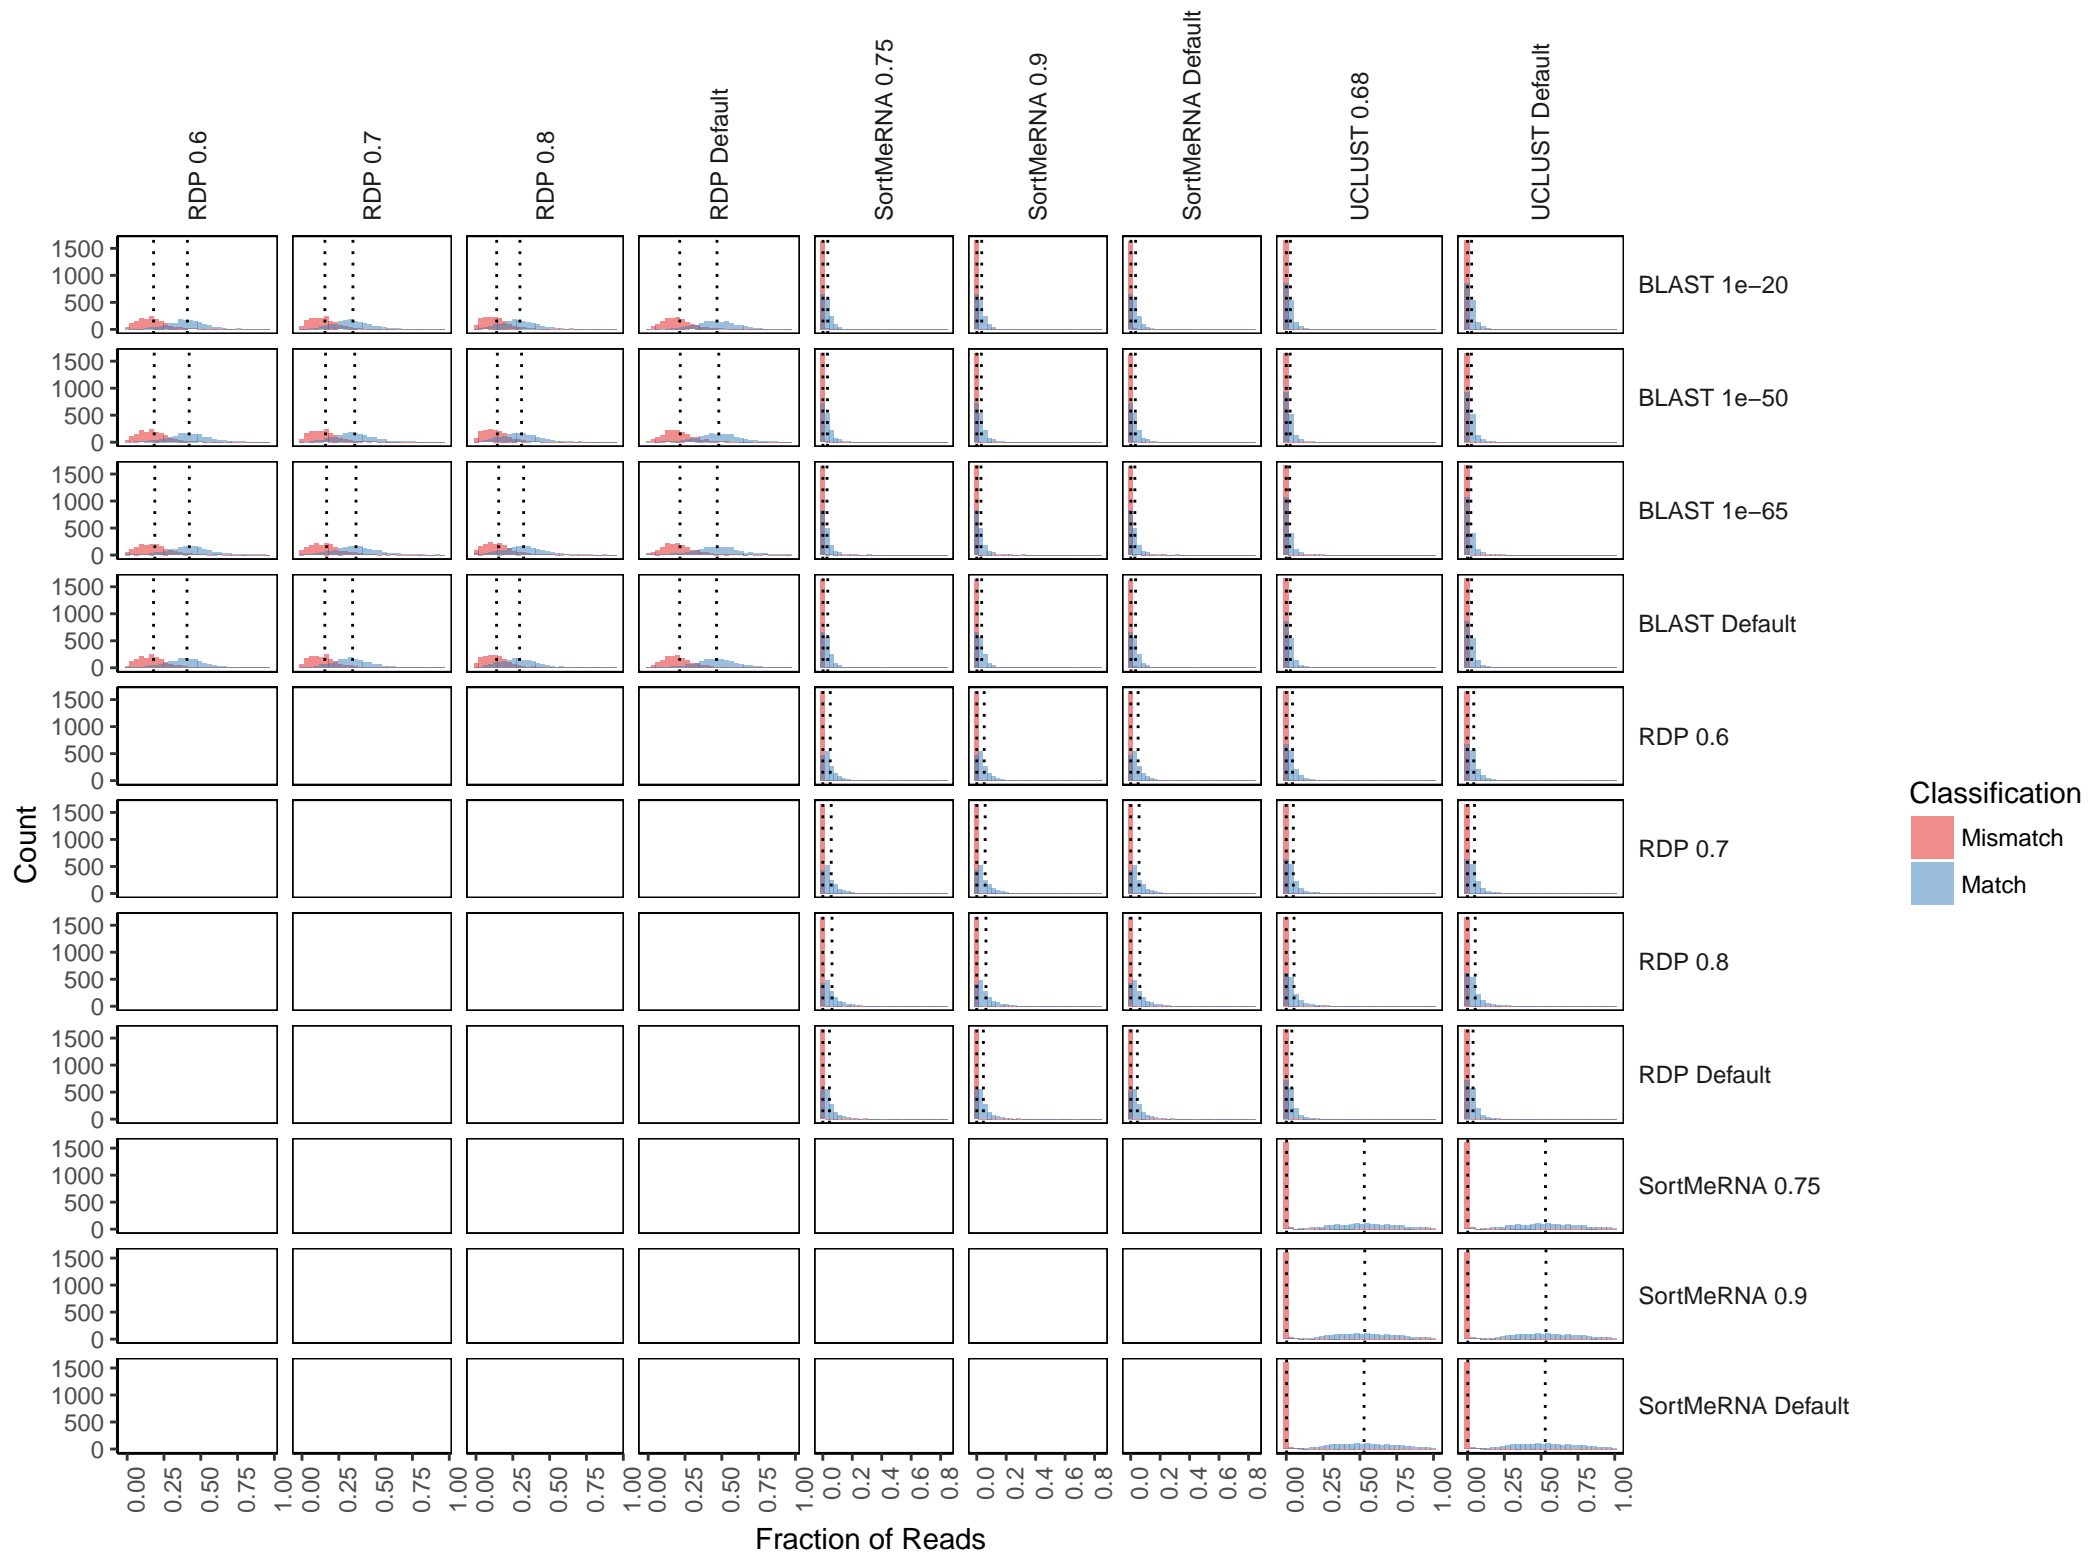

# Kingdom Greengenes

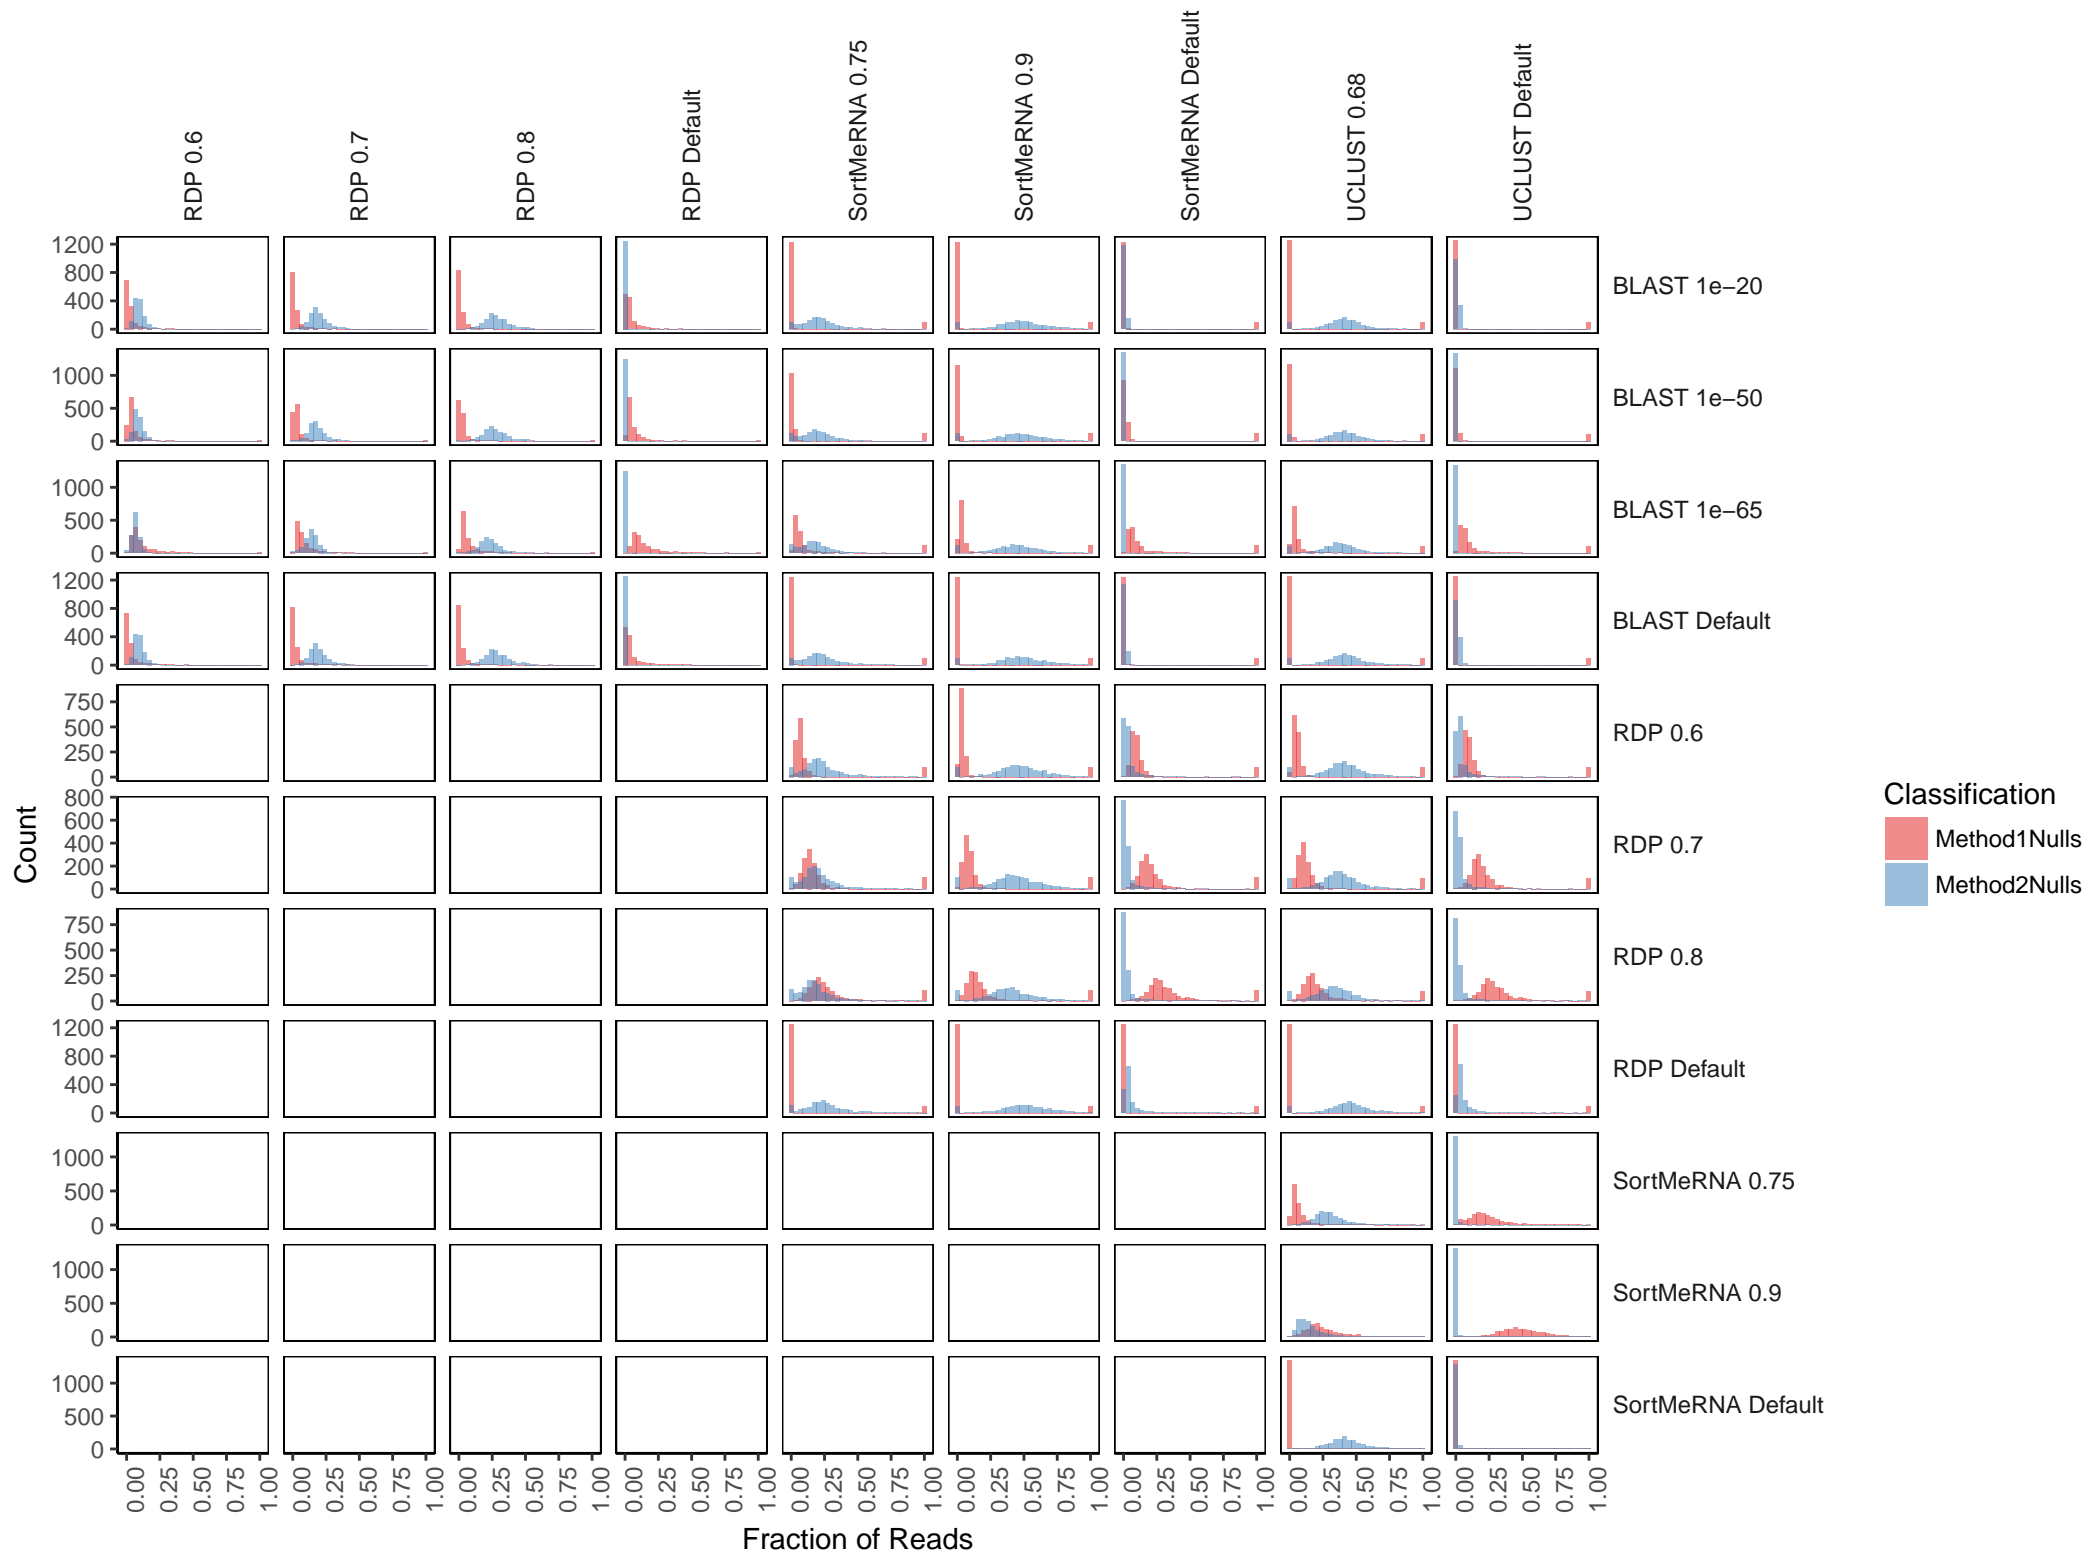

# Phylum Greengenes

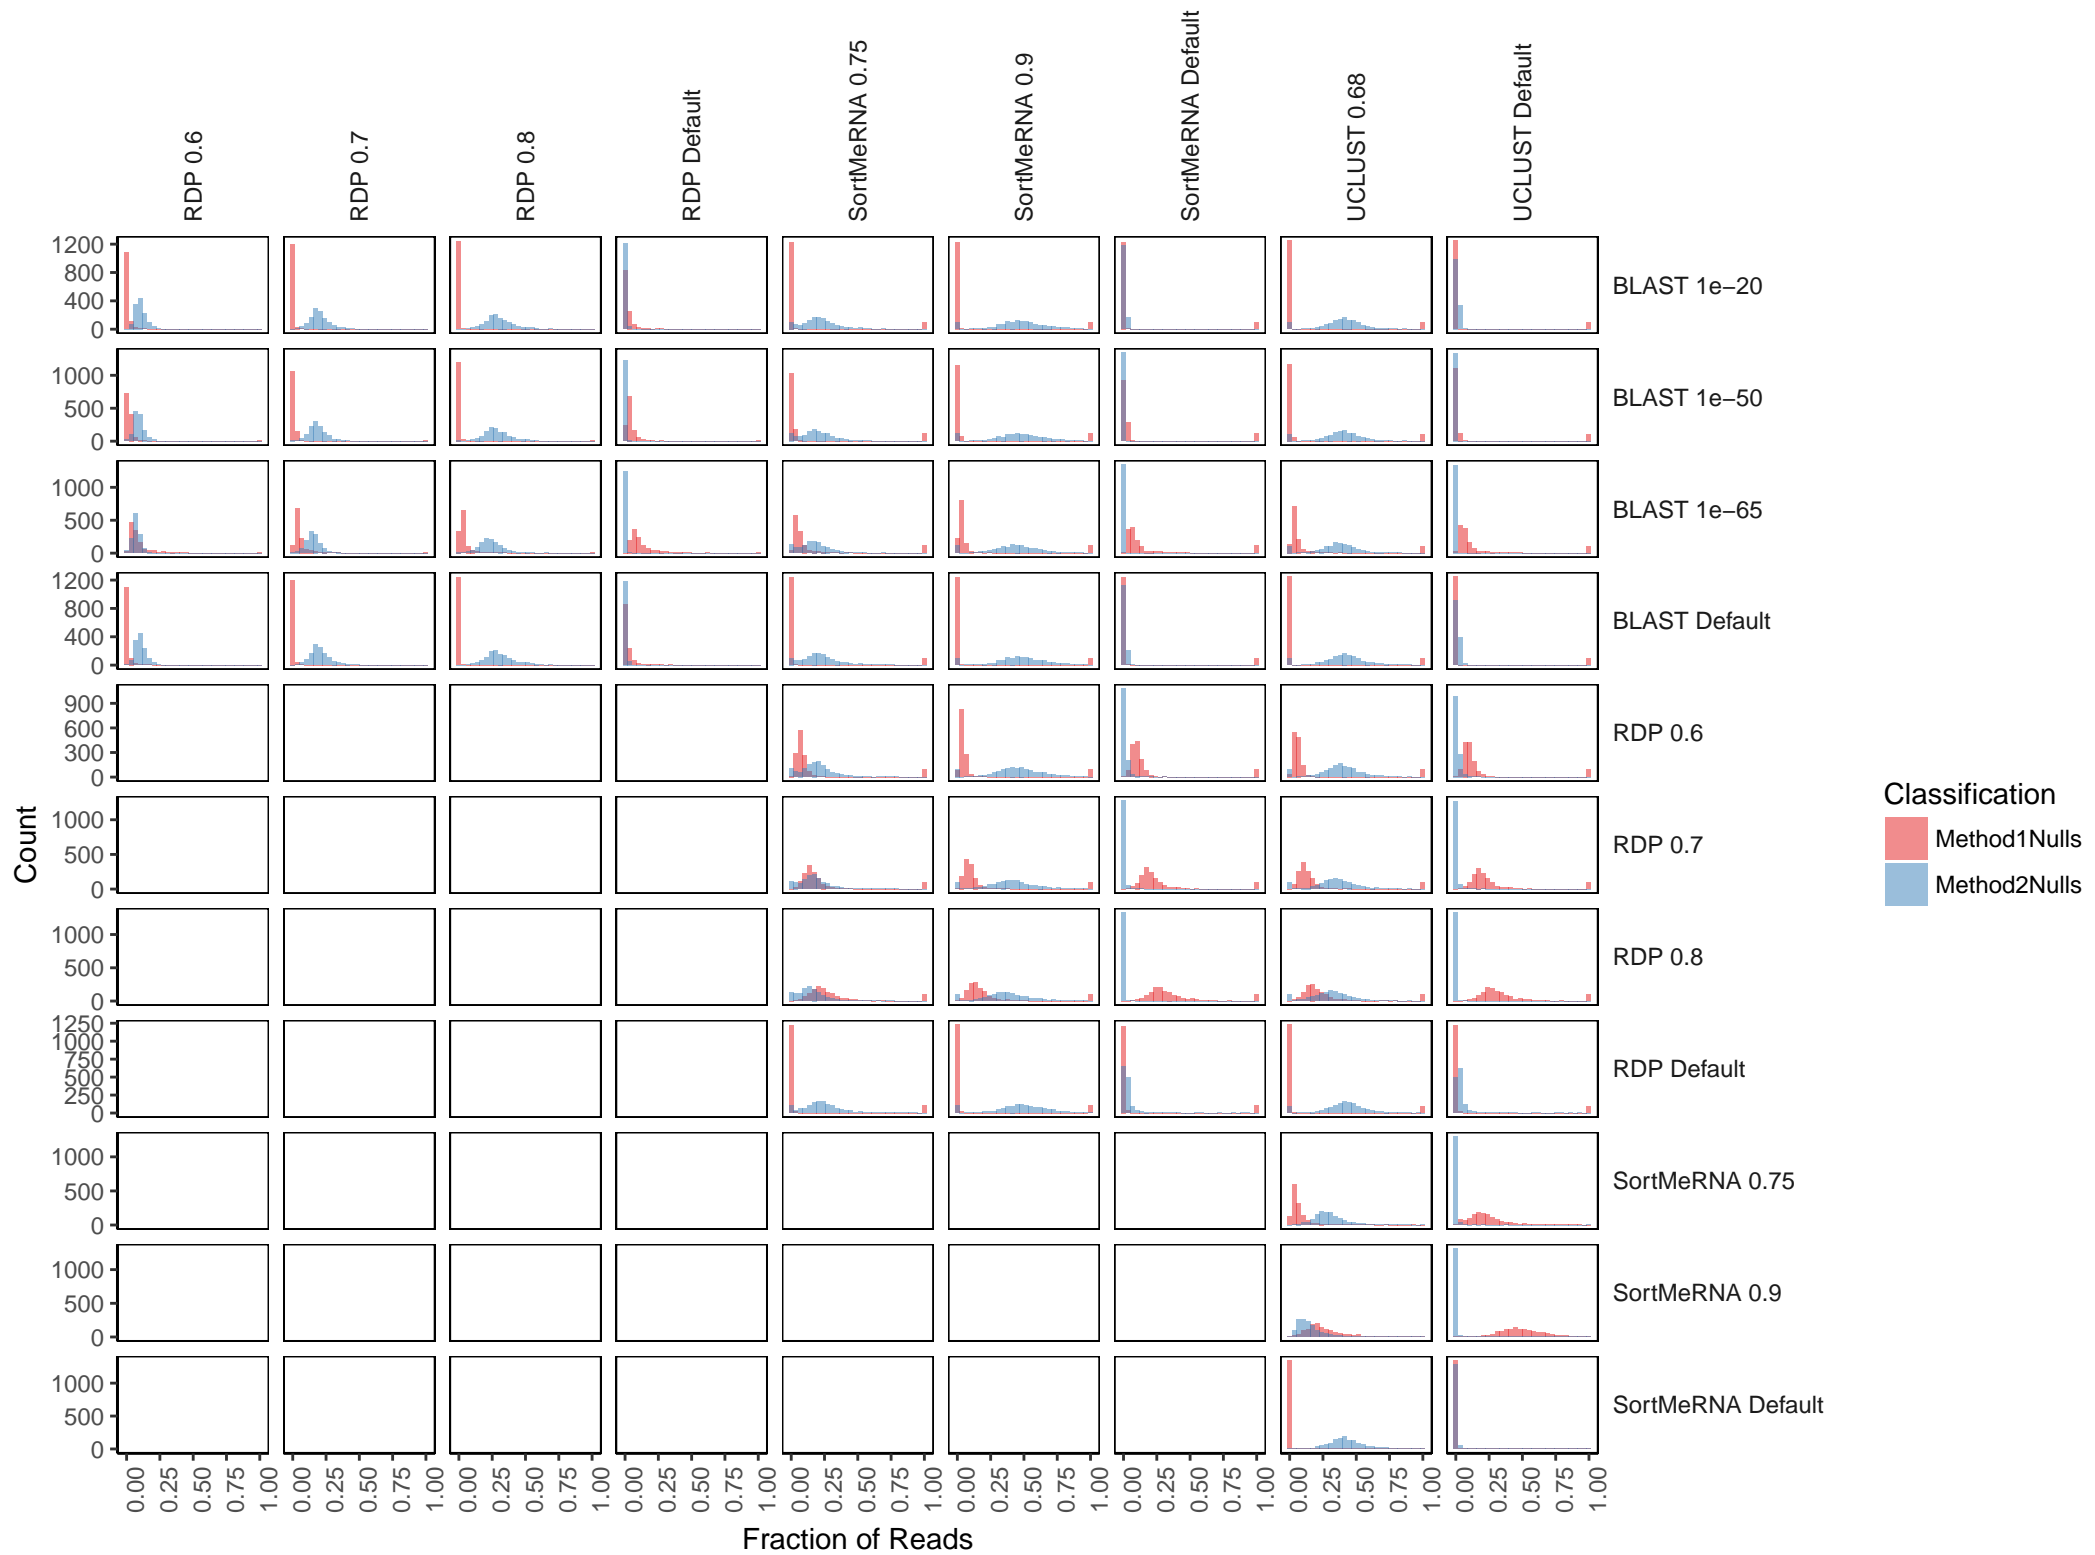

# Class Greengenes

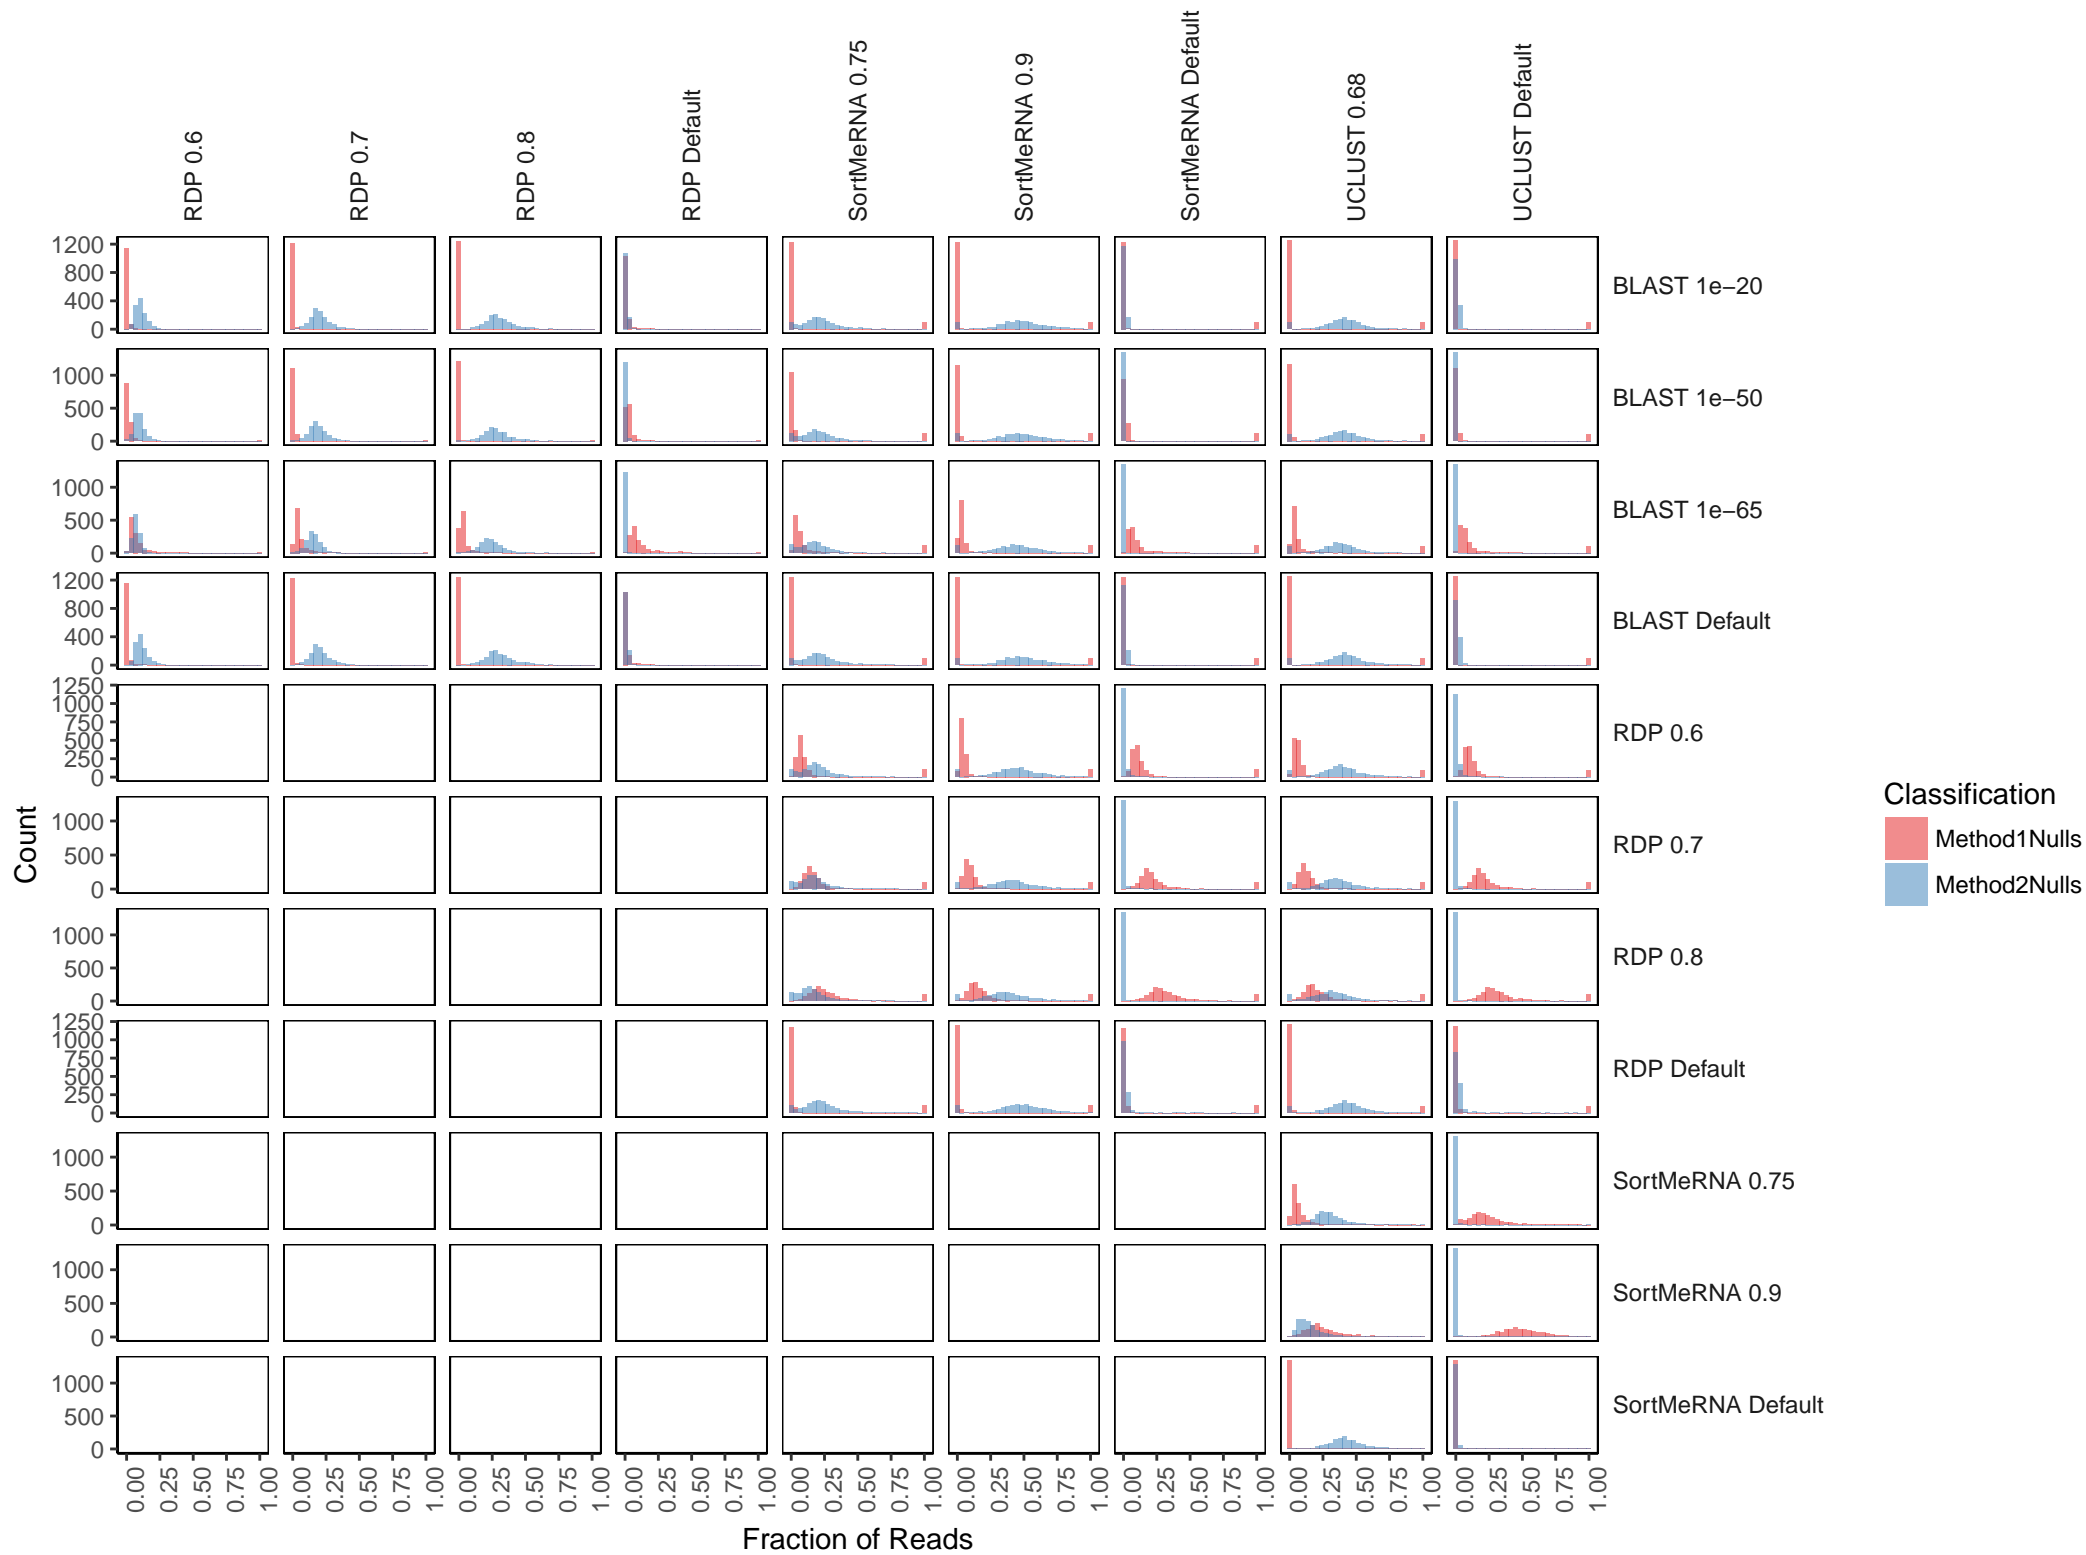



# Order Greengenes

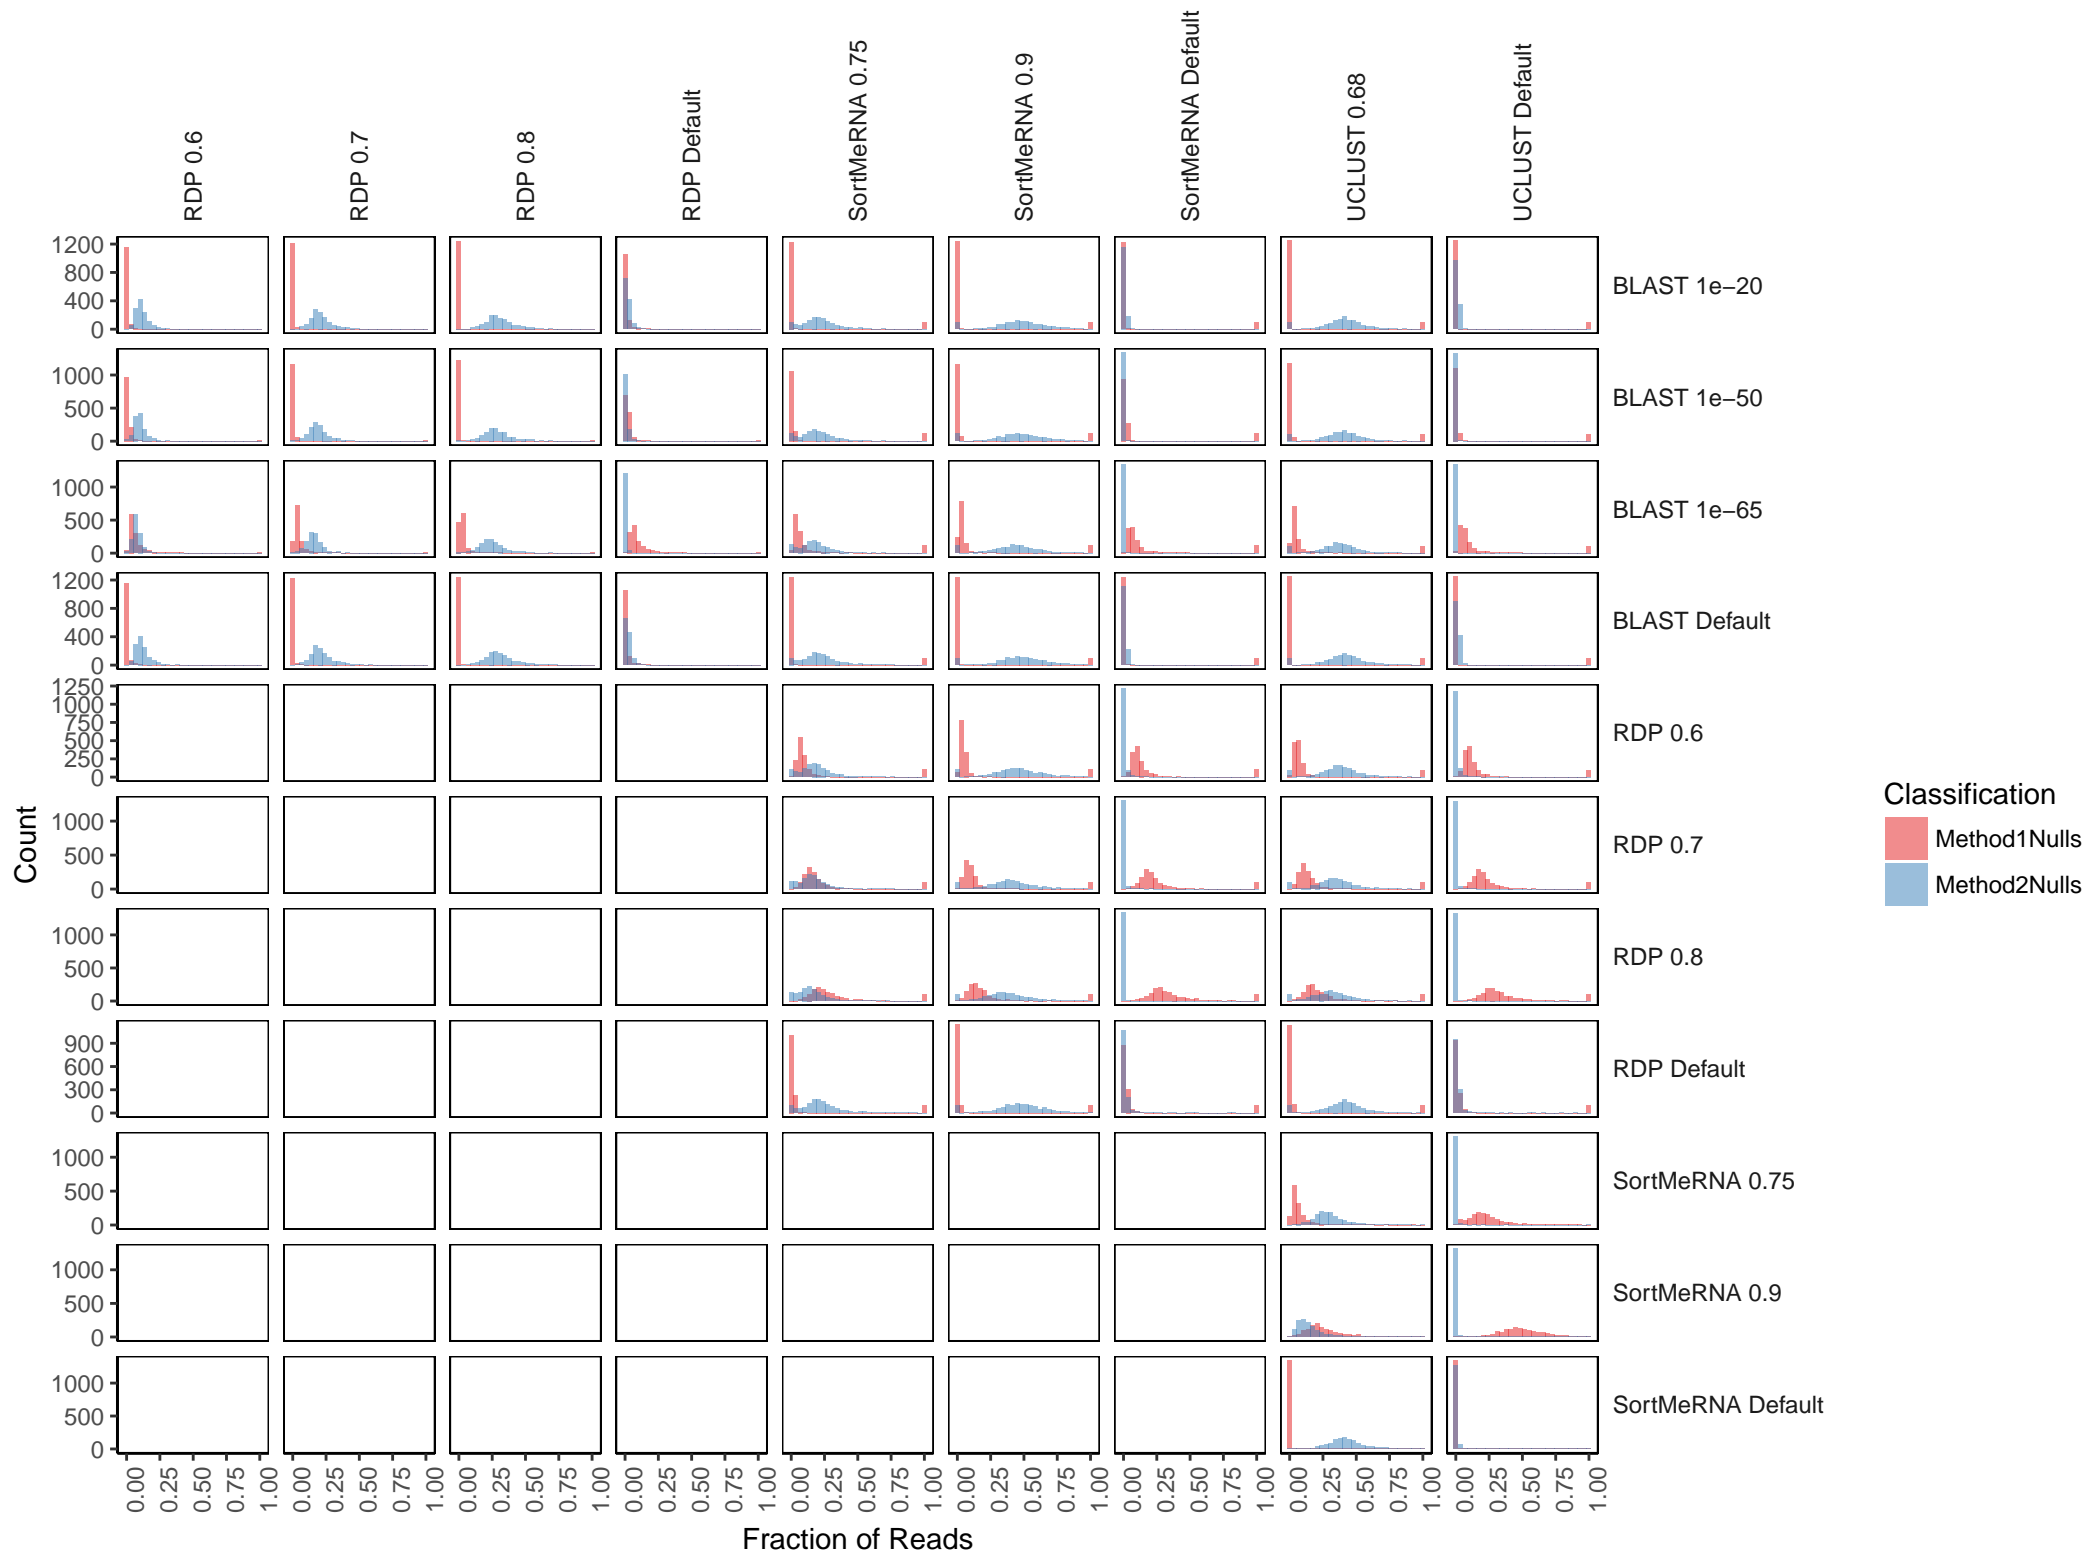

# Family Greengenes

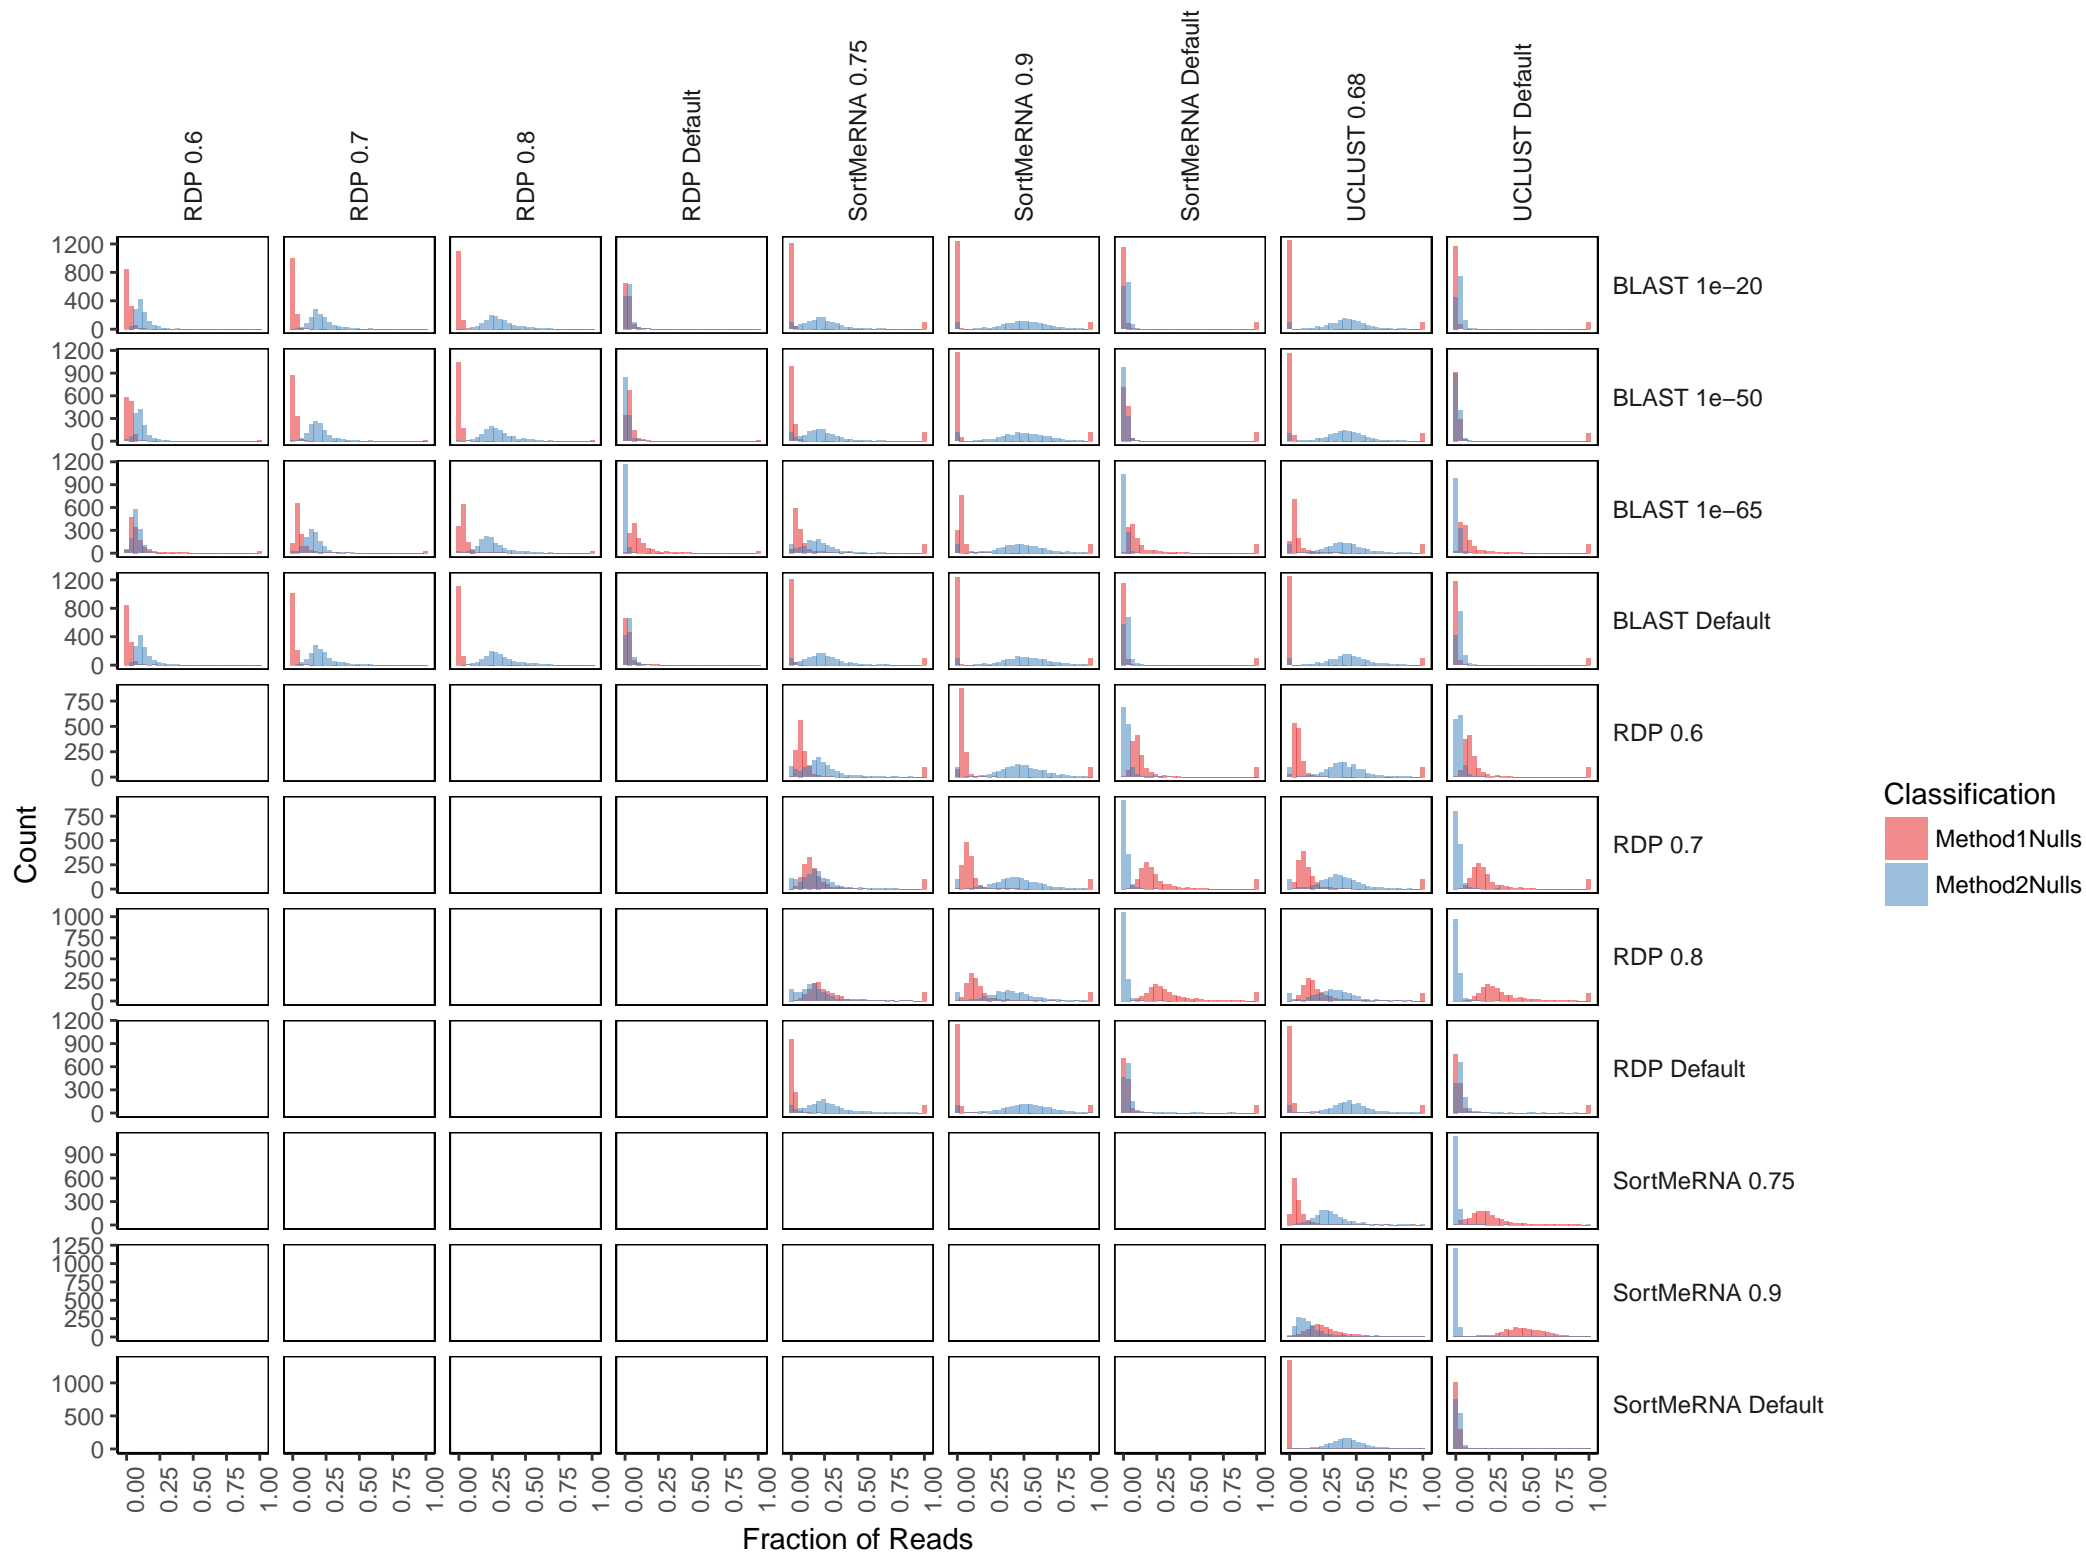

# Genus Greengenes

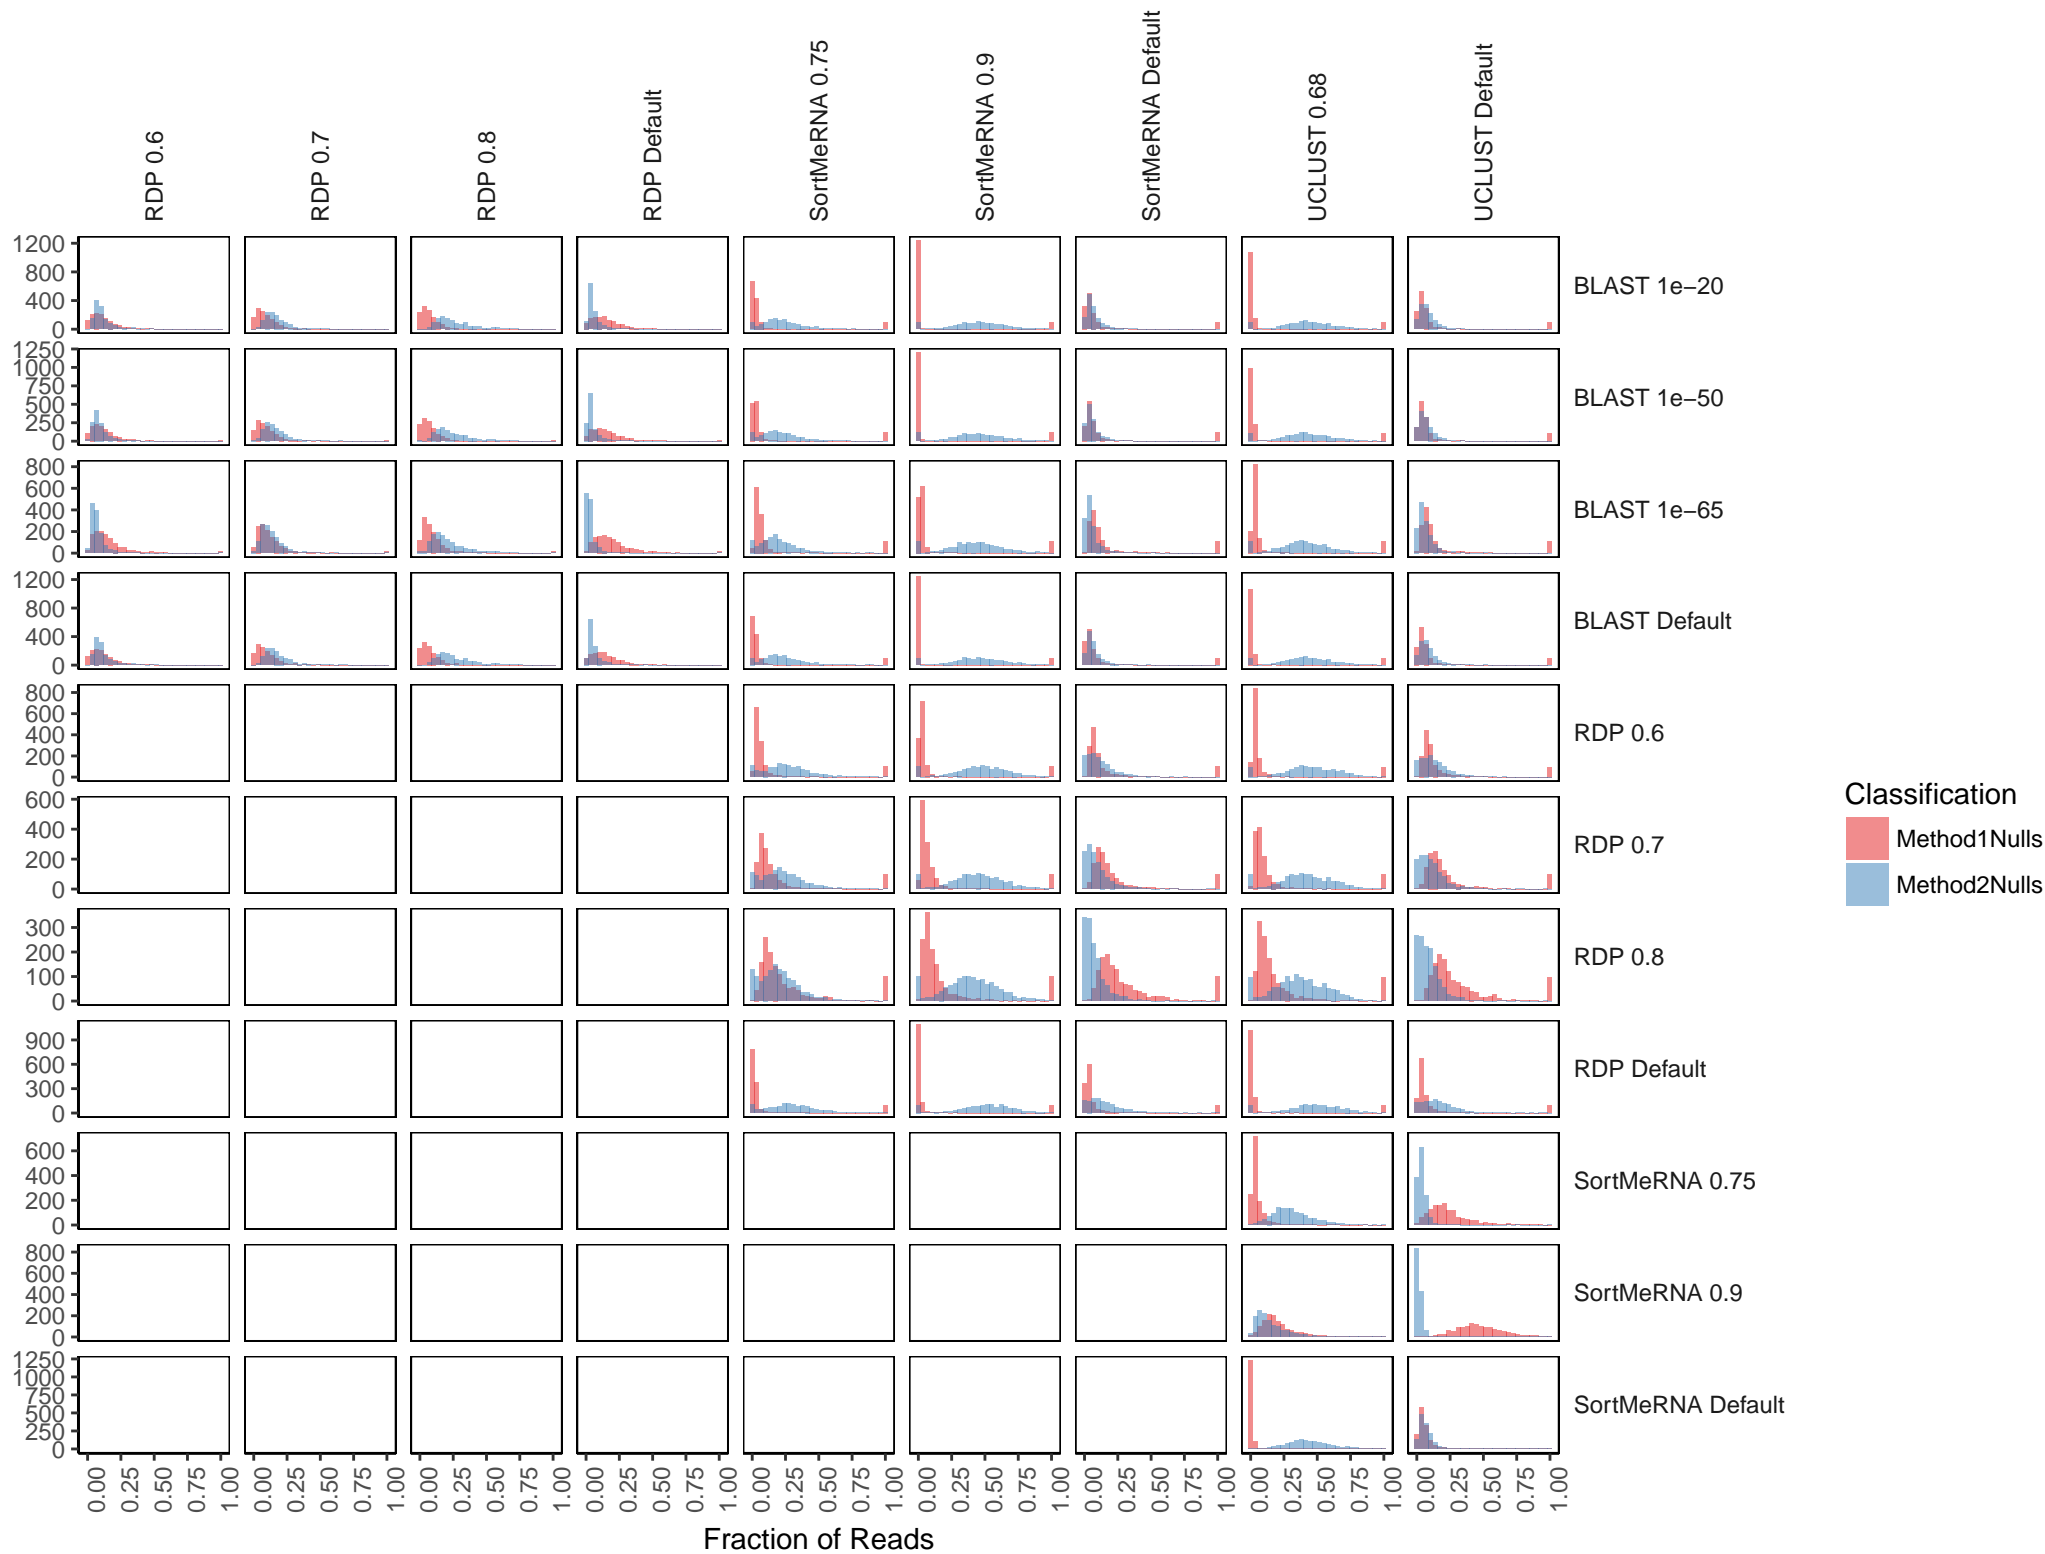

# Species Greengenes

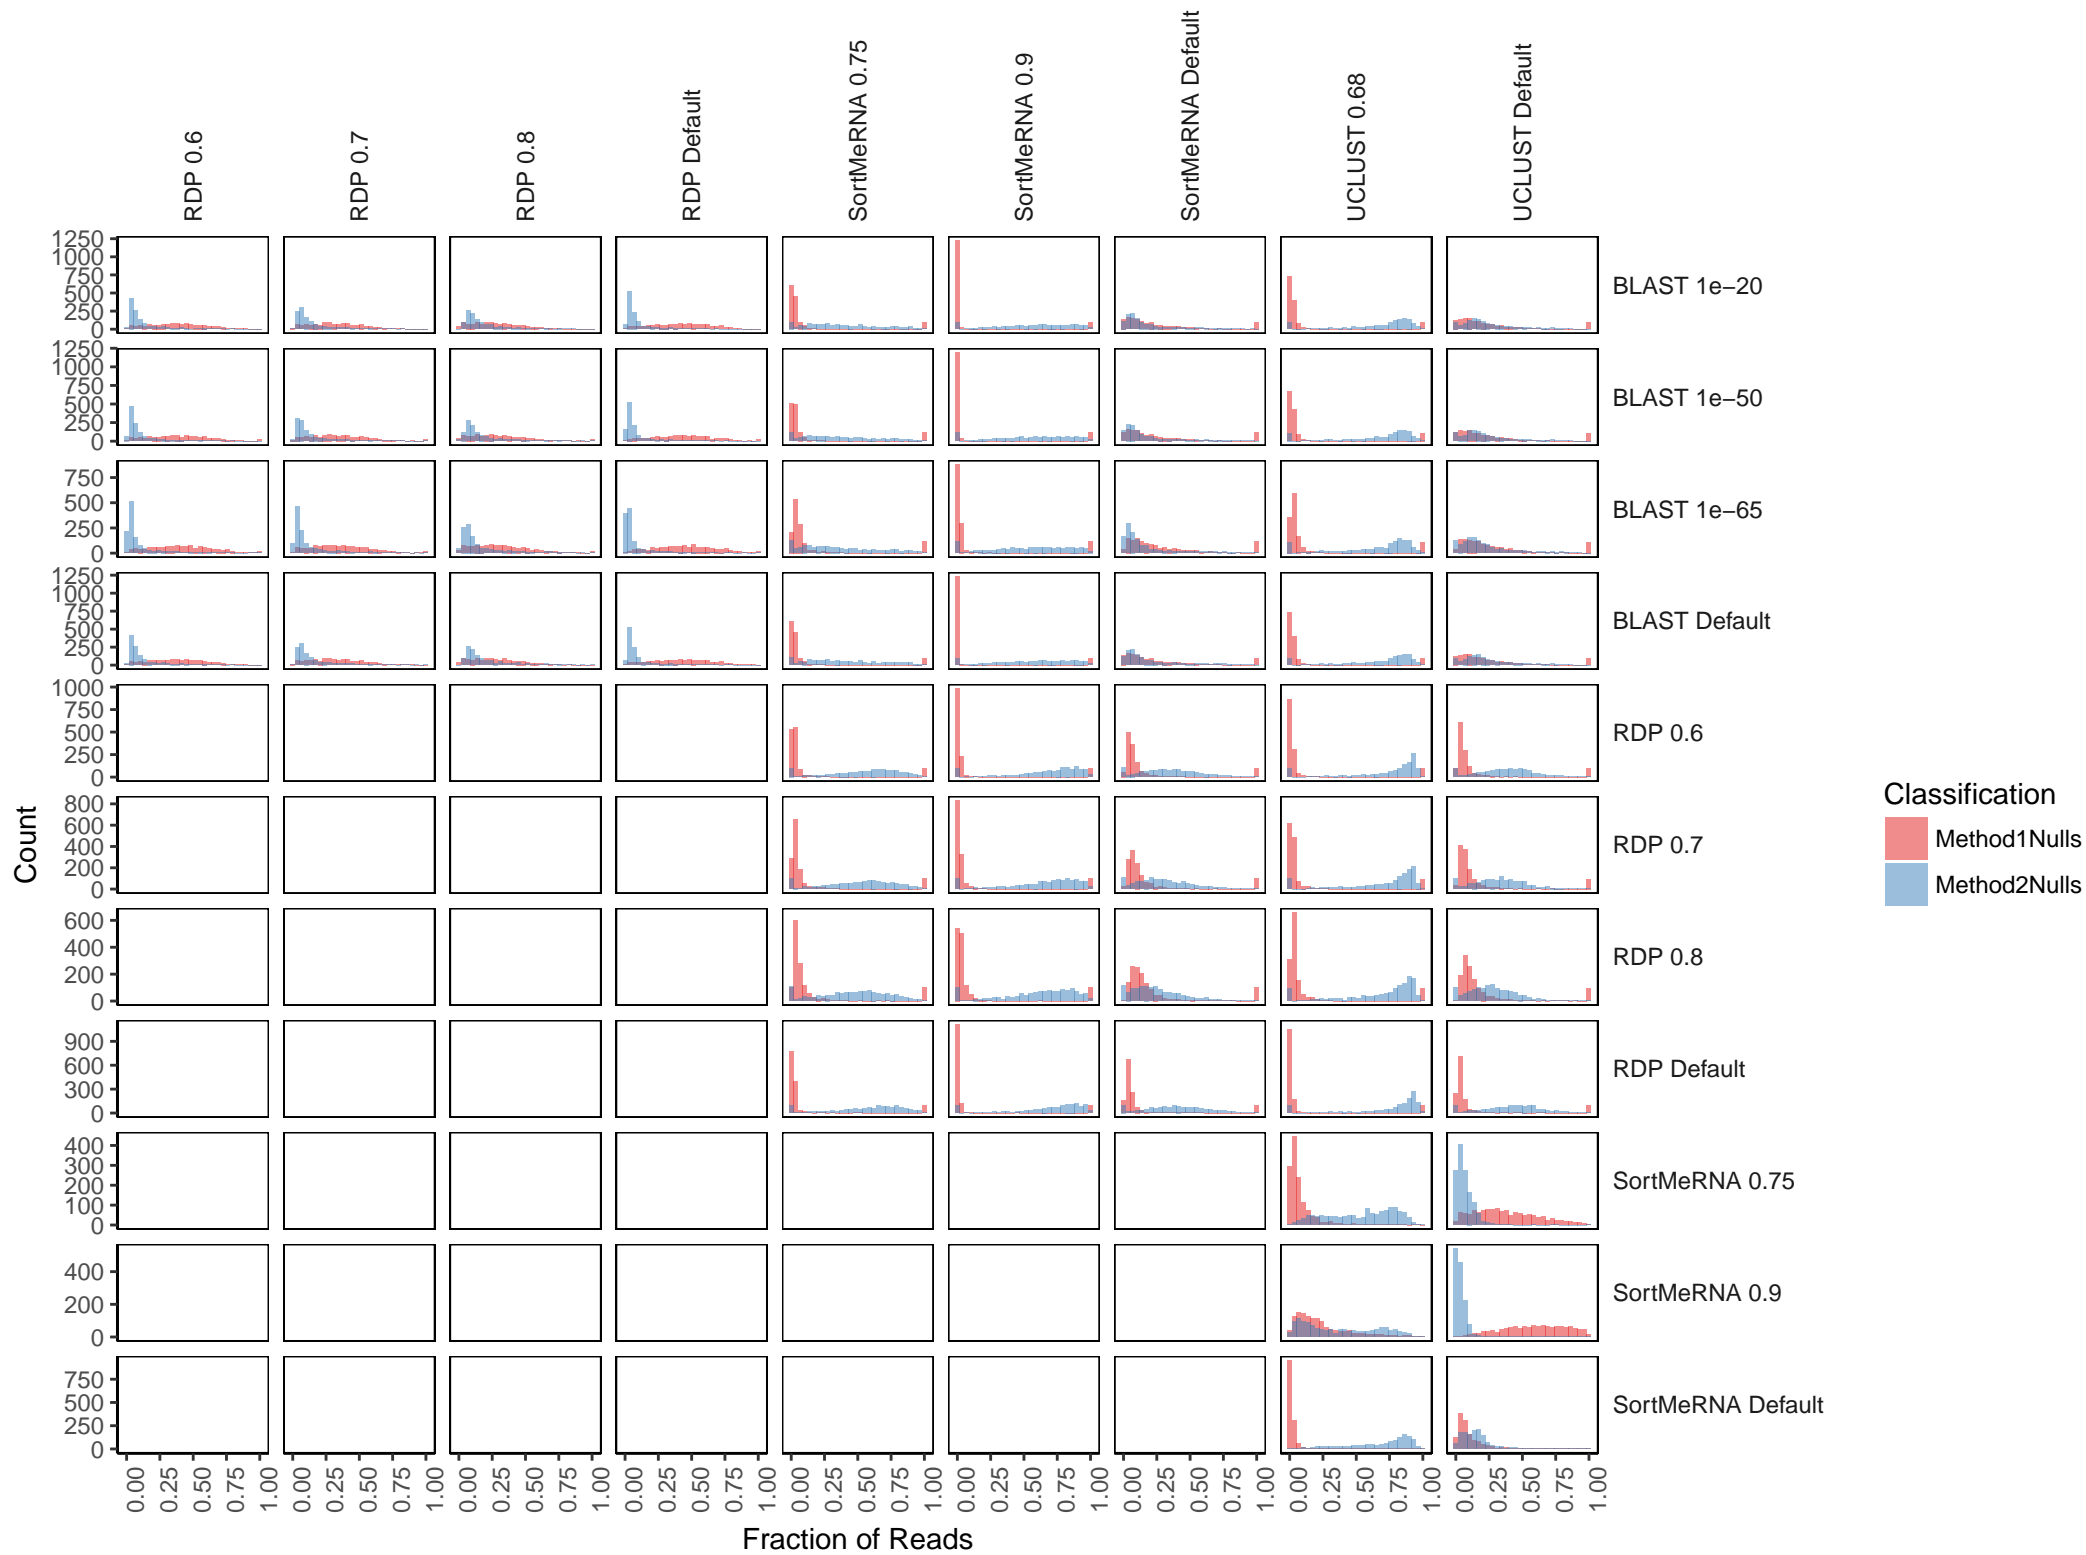

# Phylum HITdb

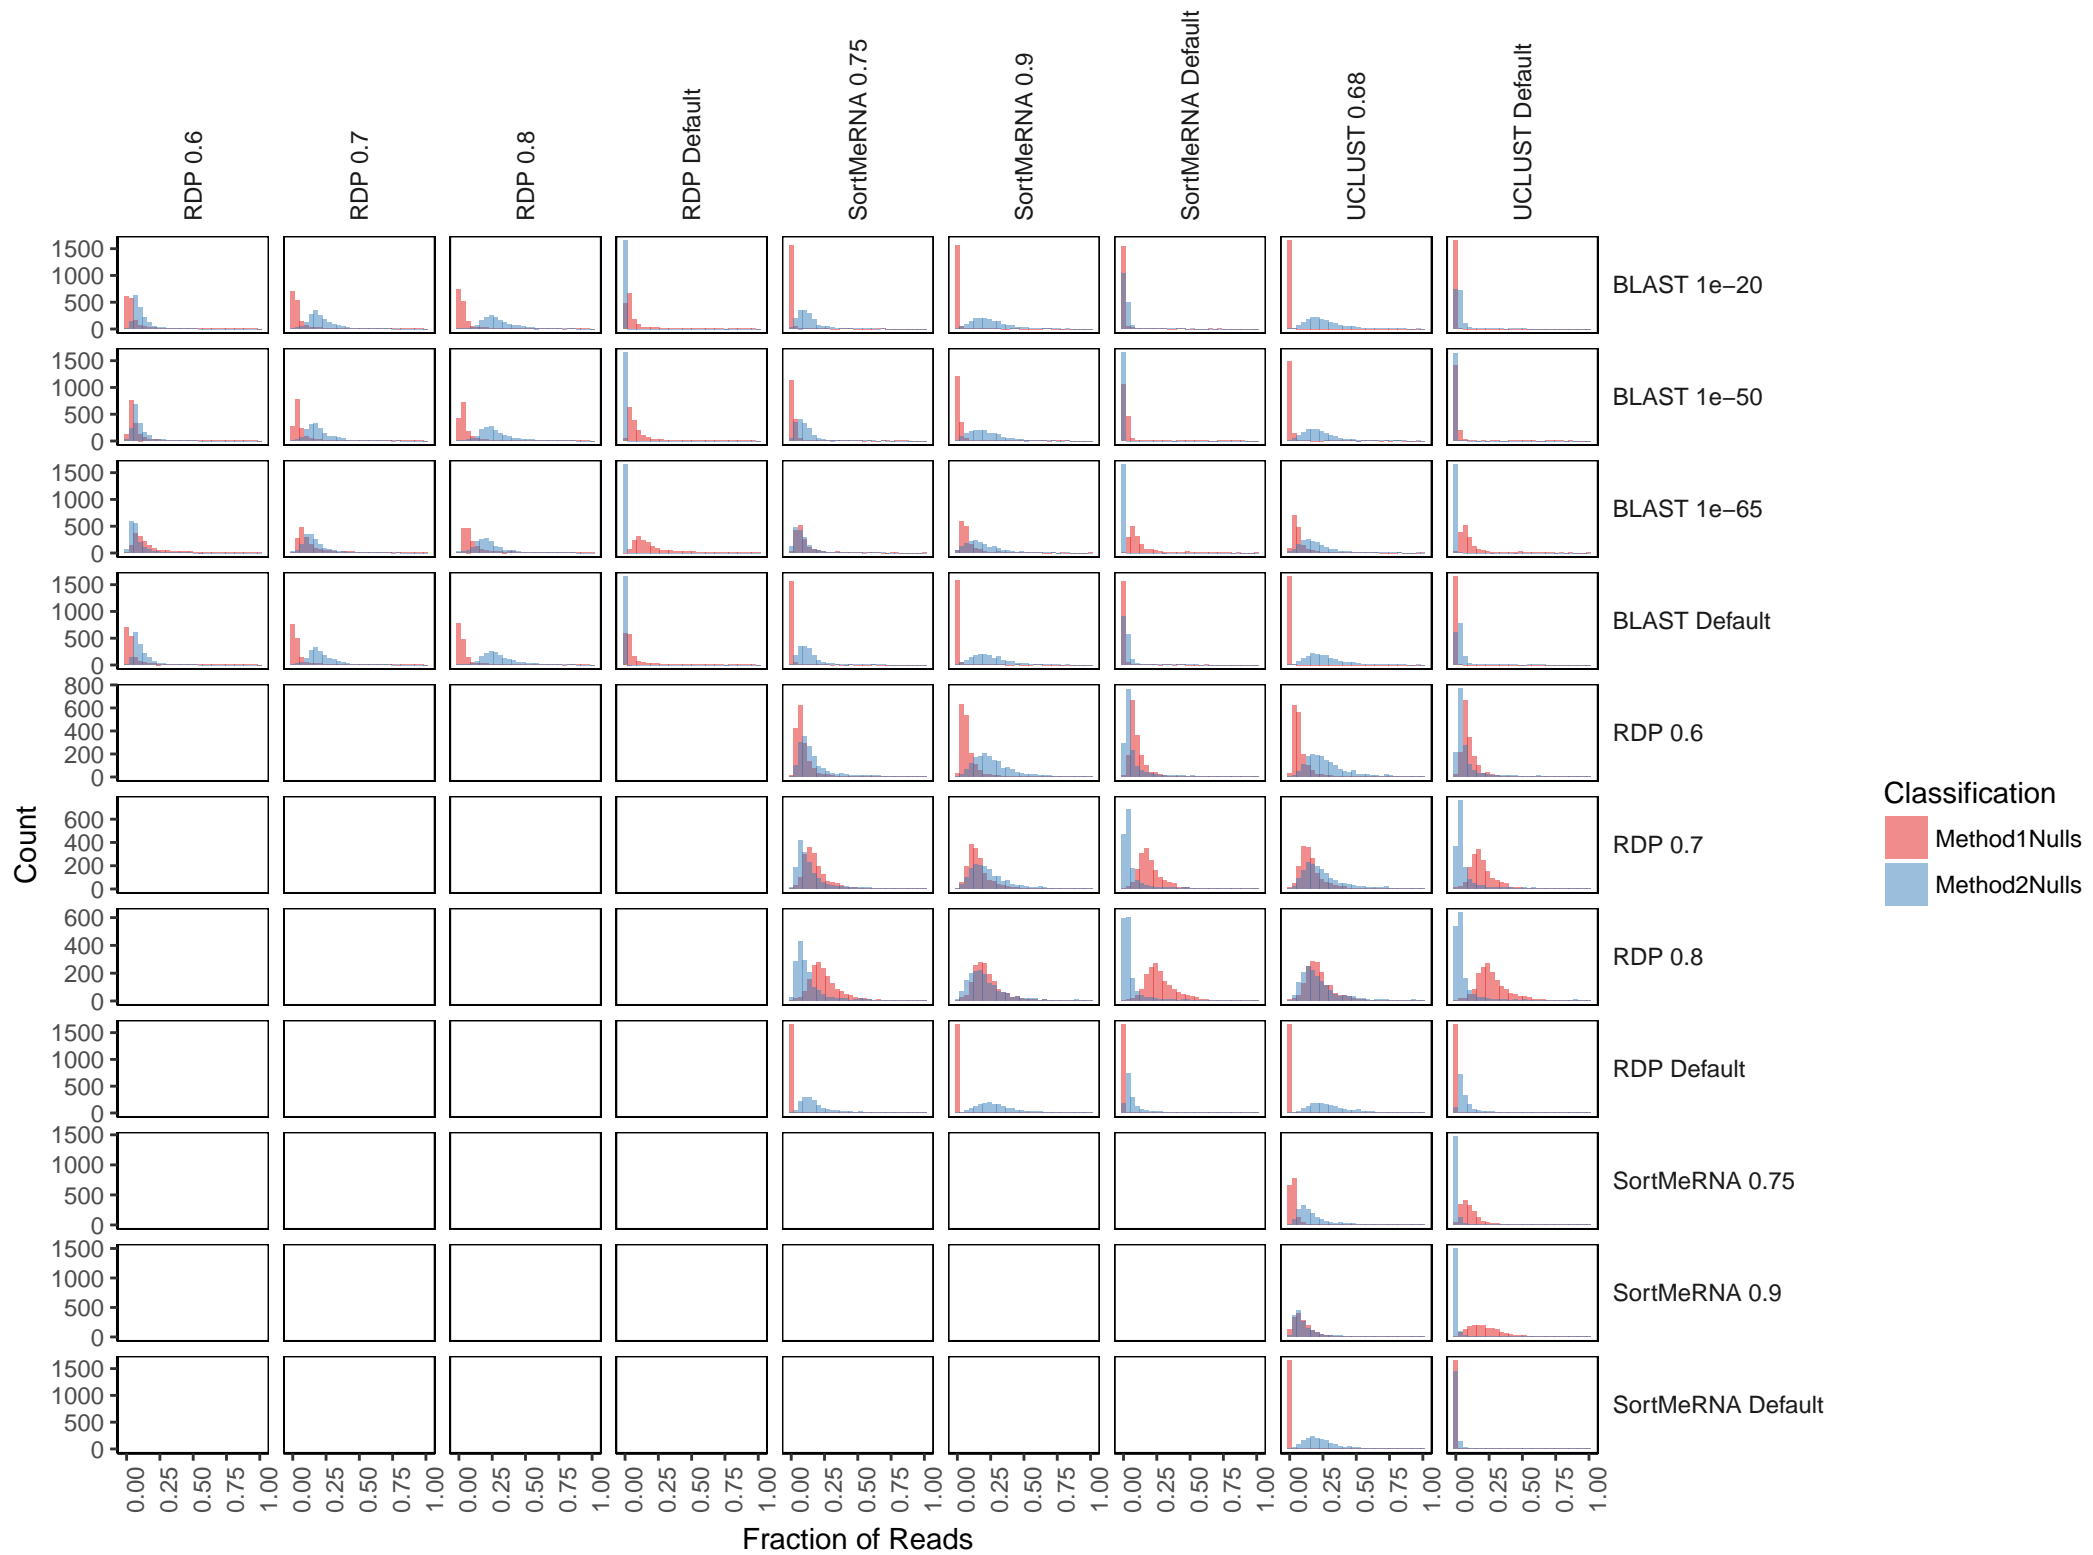

# Class HITdb

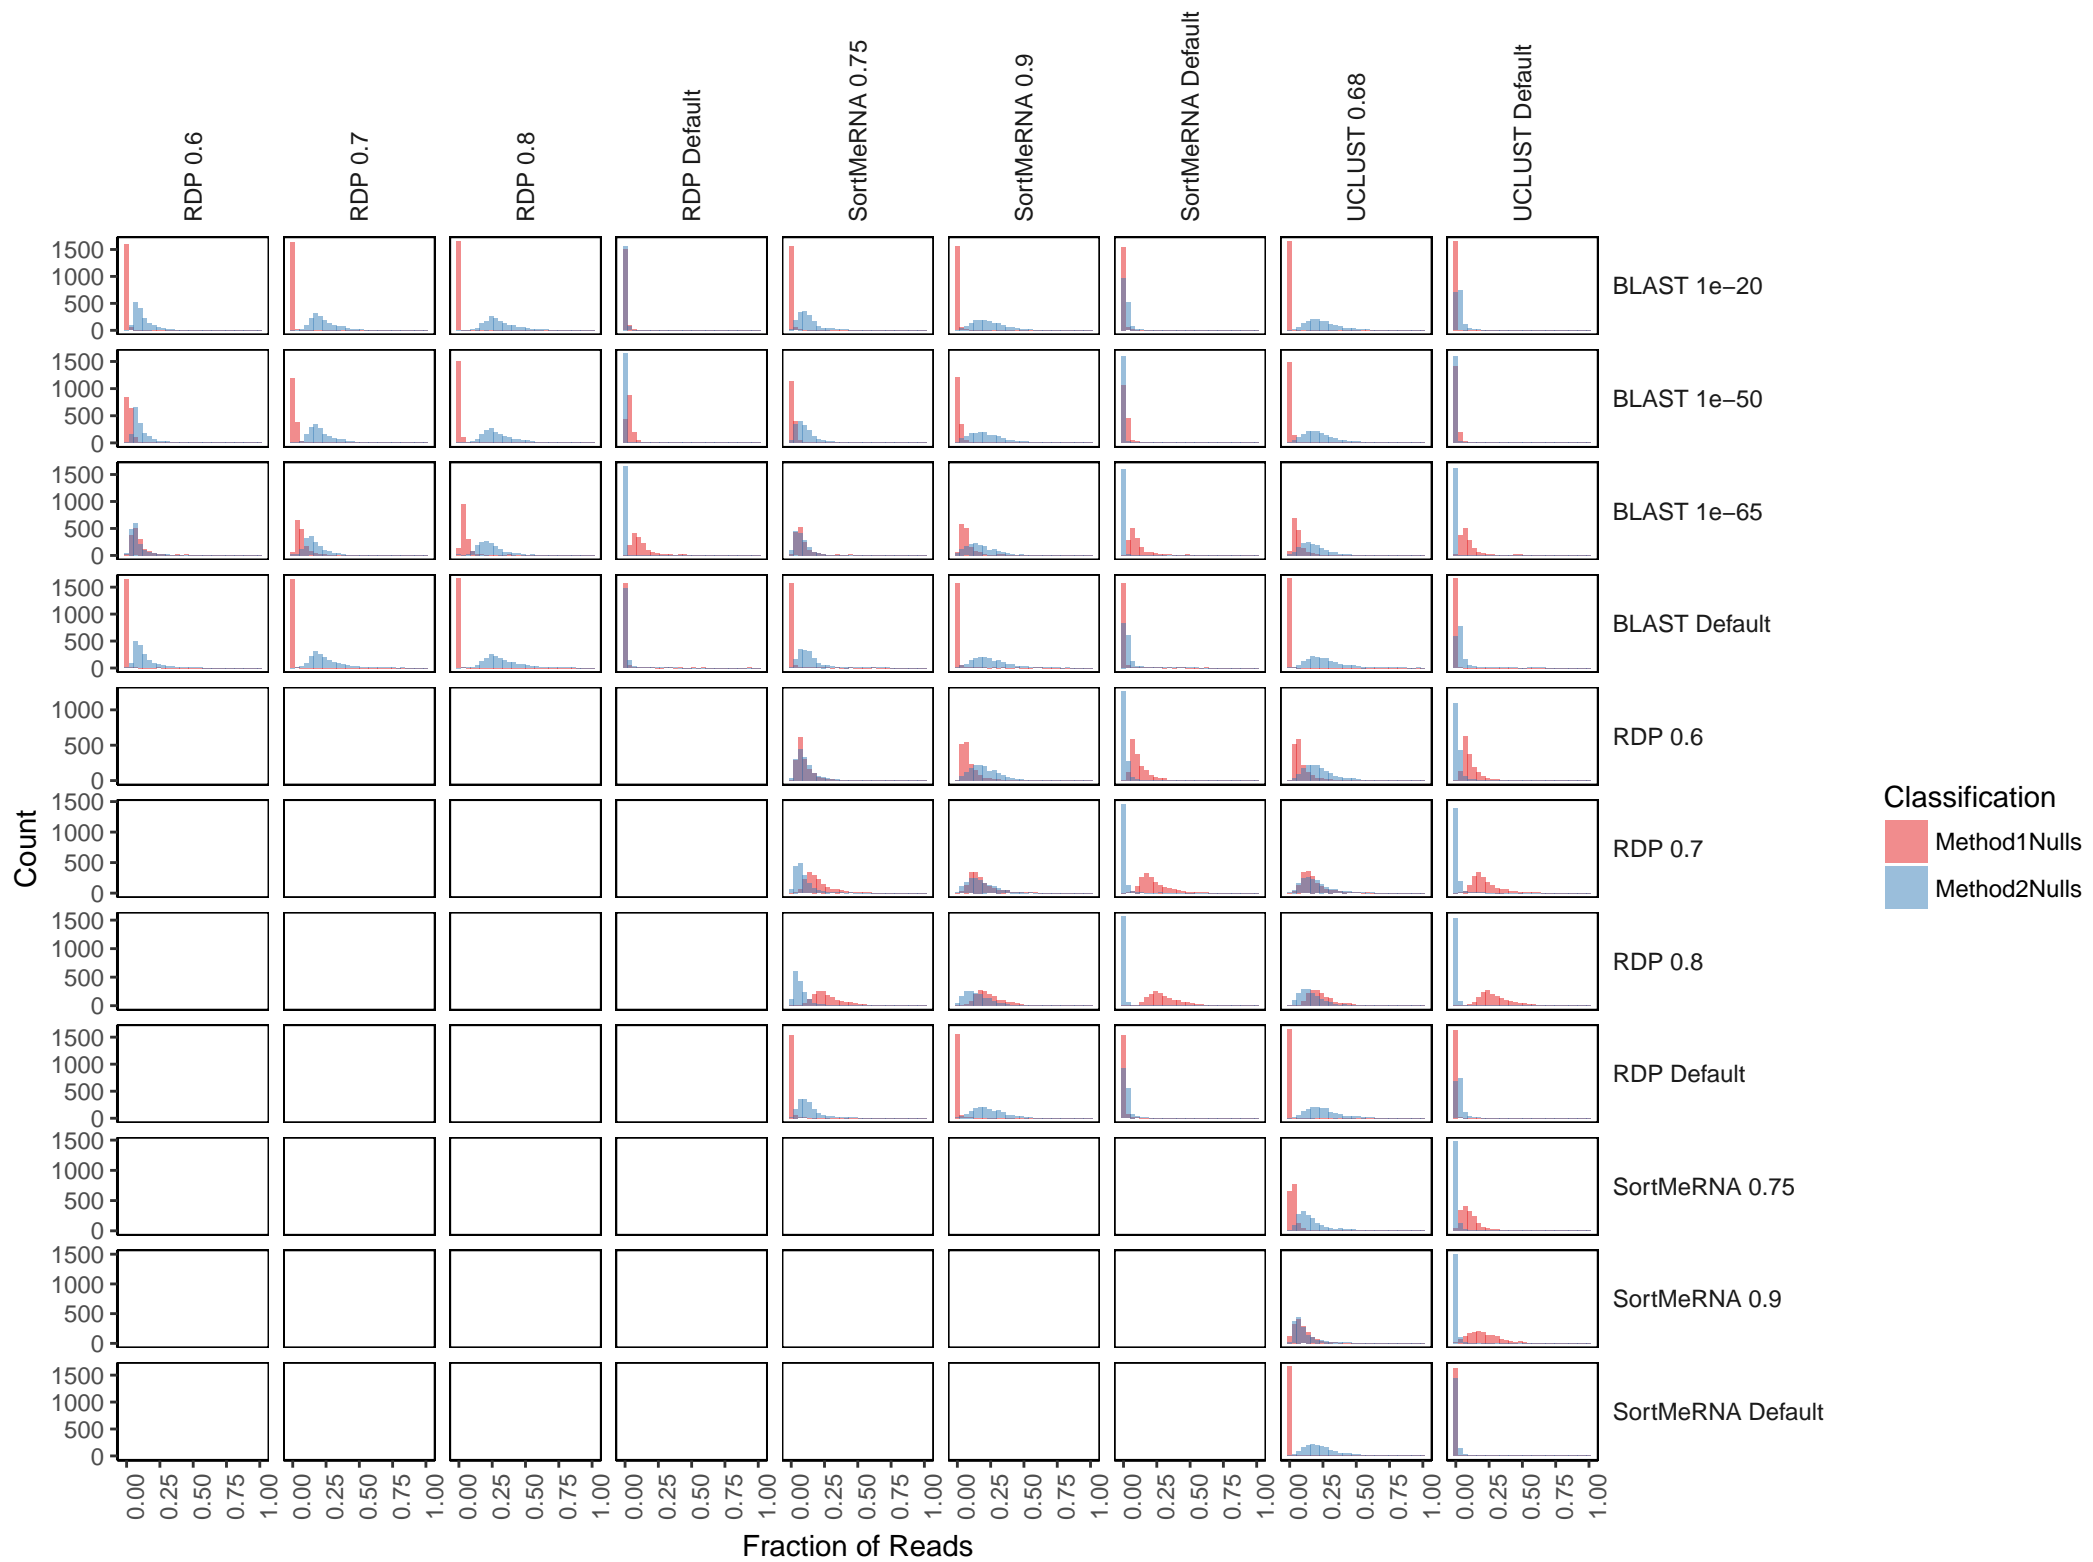

# Order HITdb

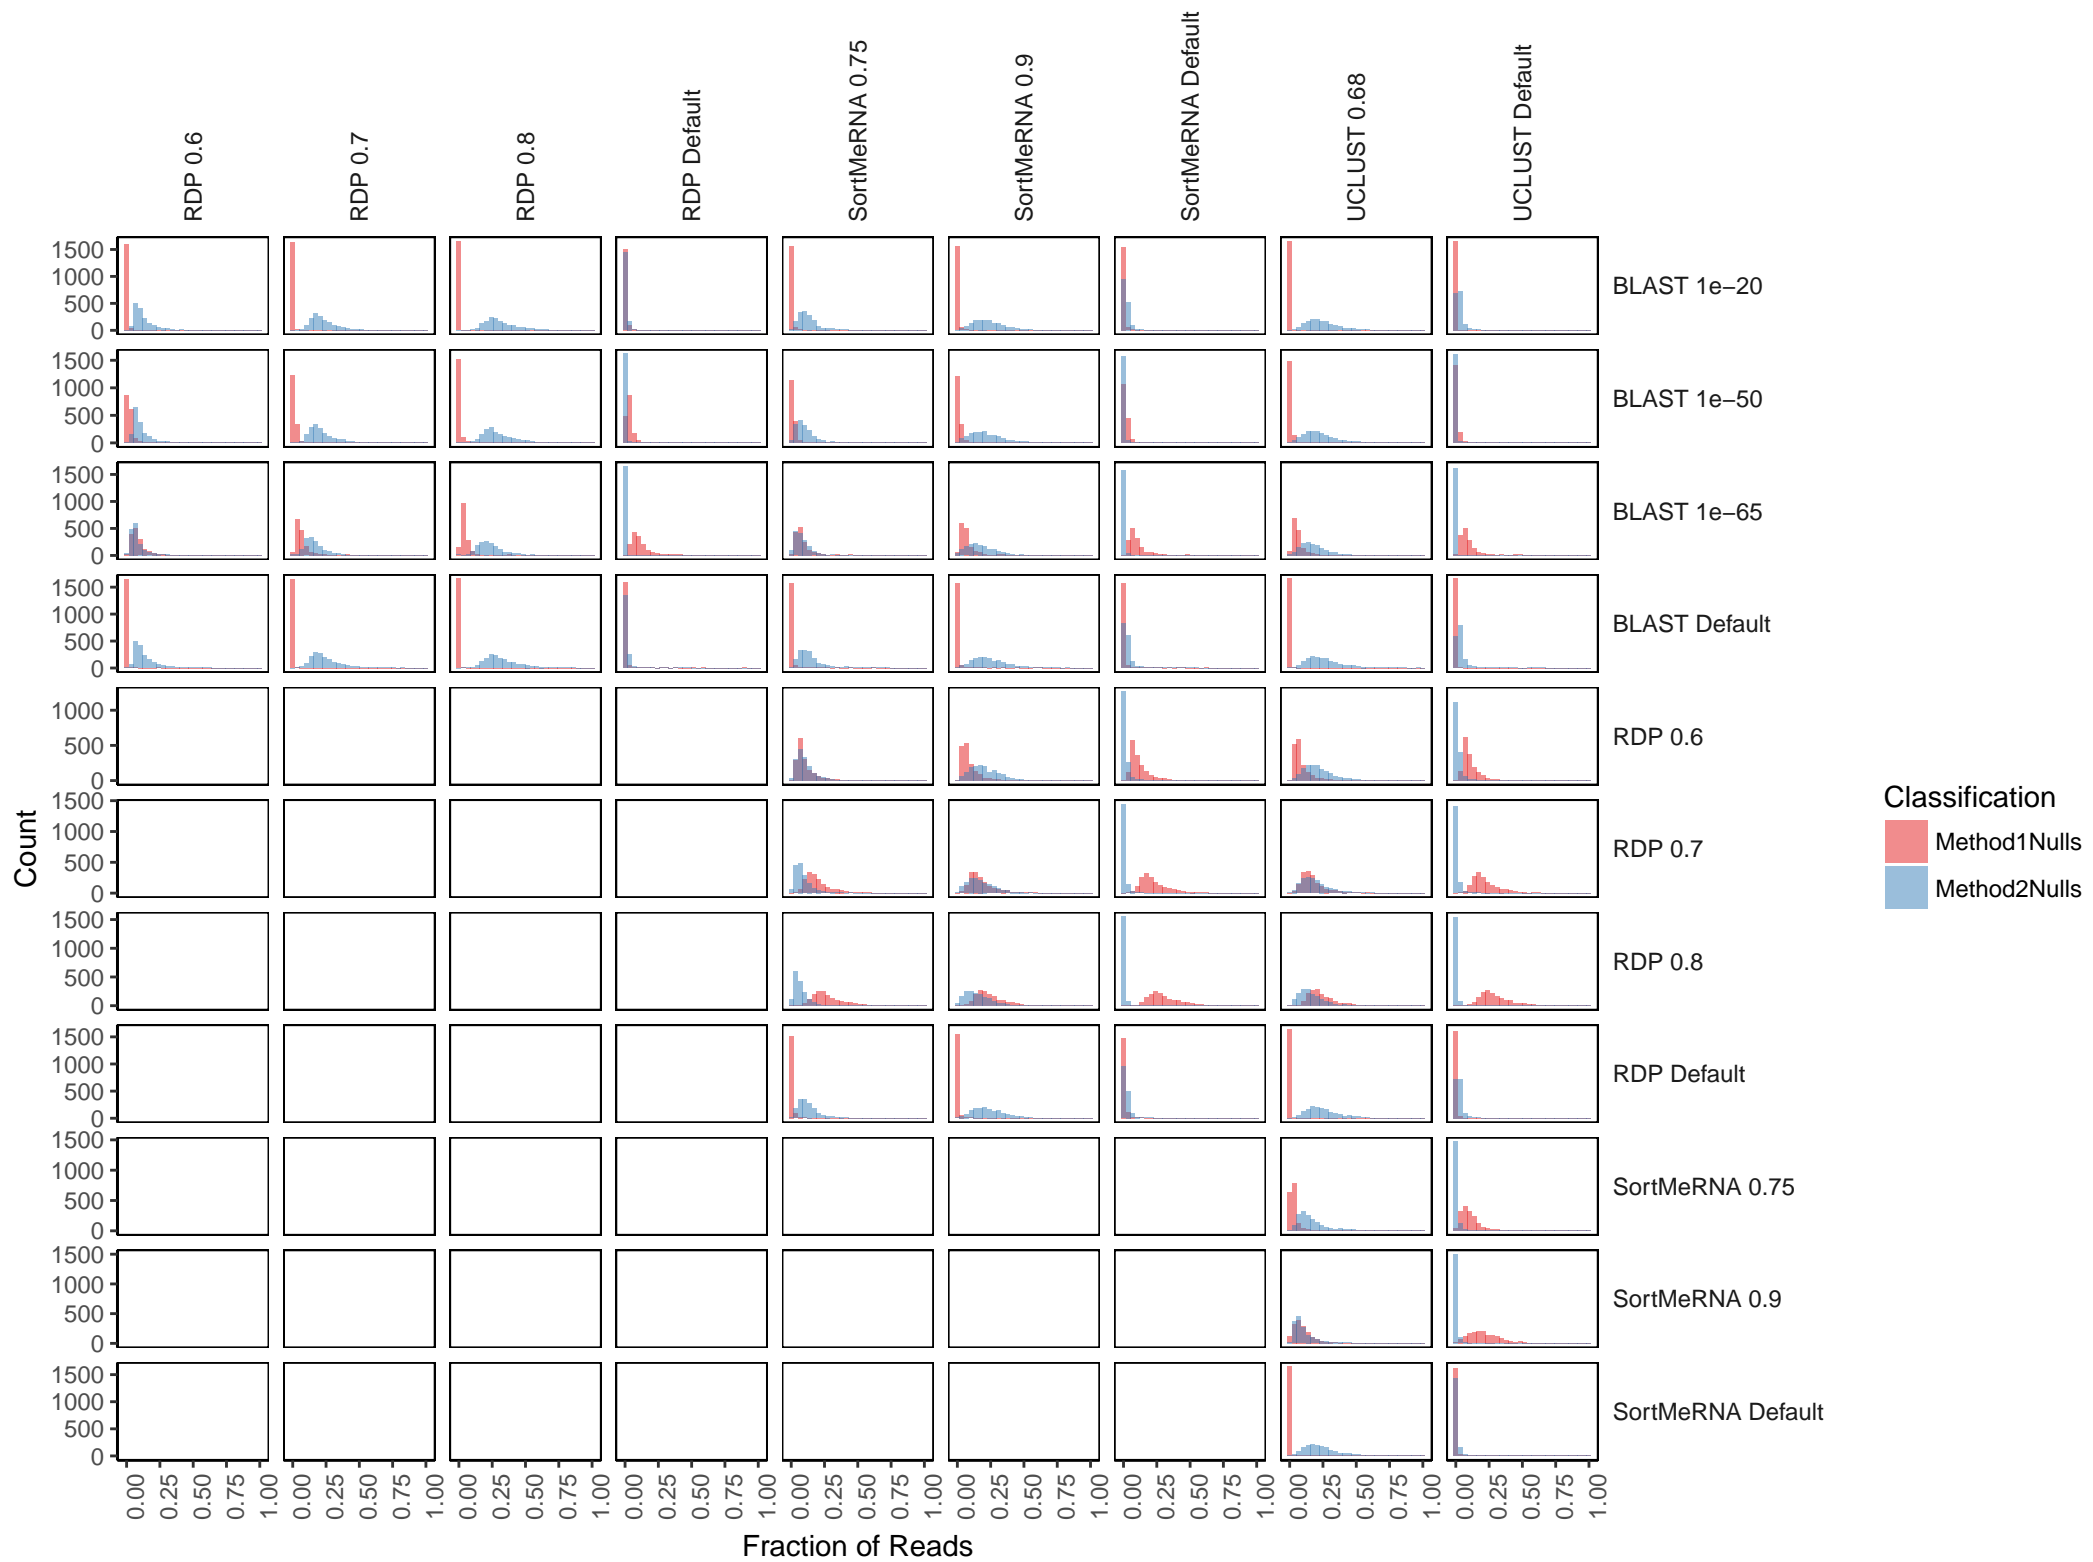

# Family HITdb

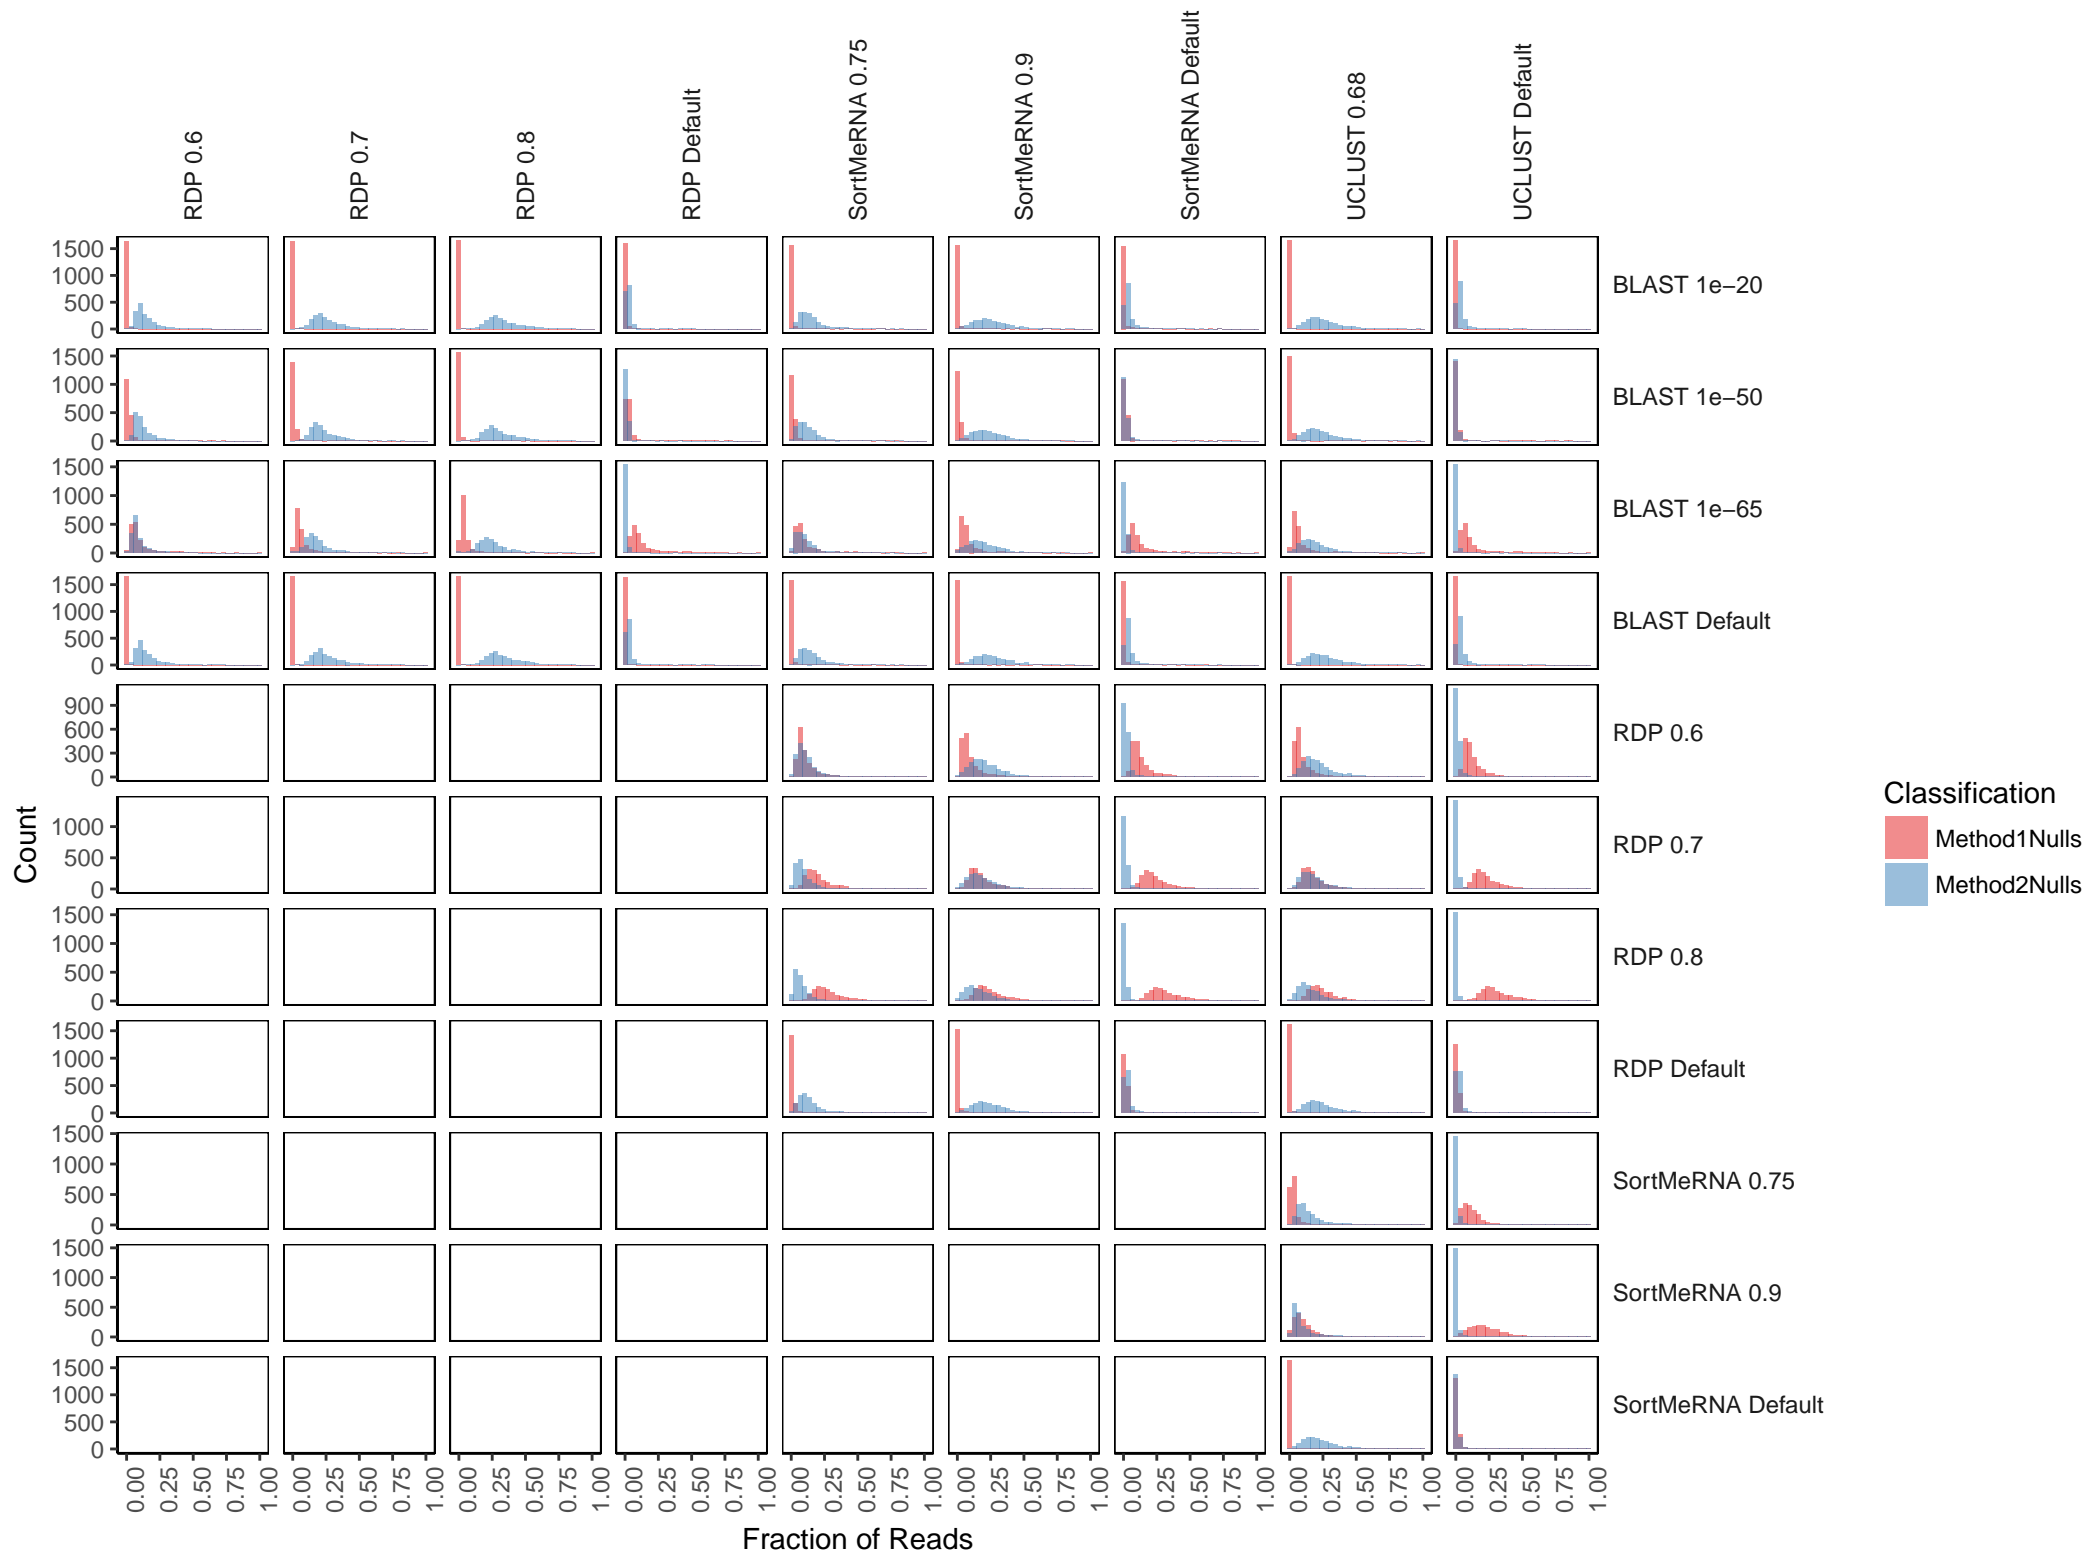



# Genus HITdb

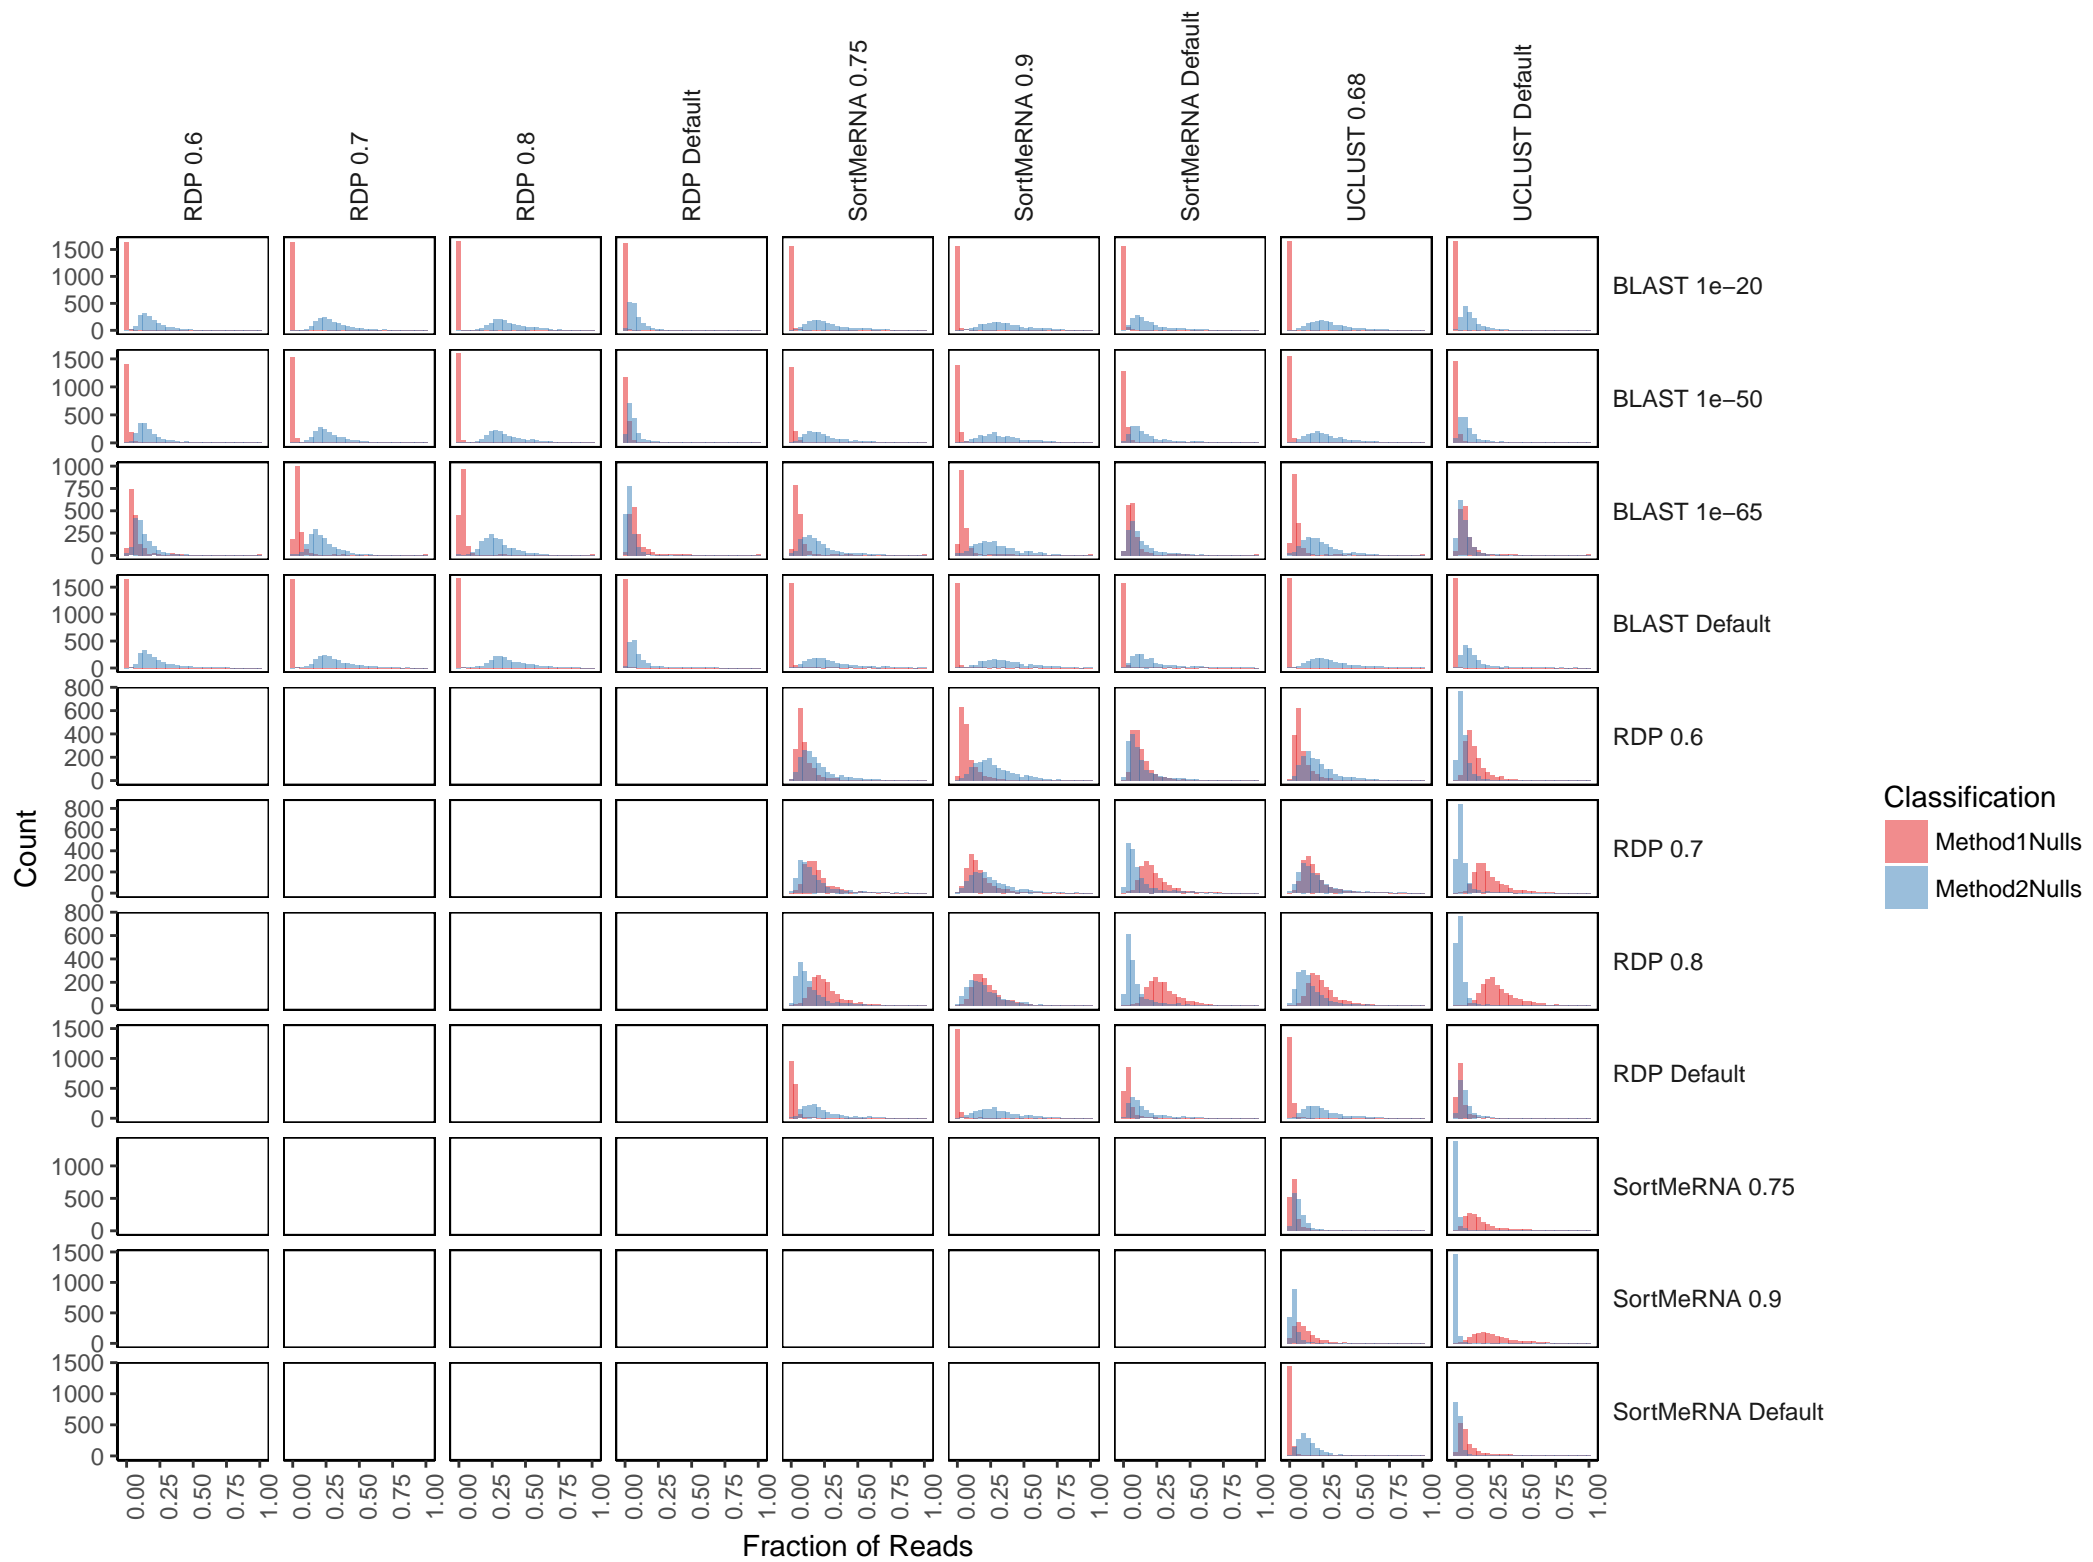

# Species HITdb

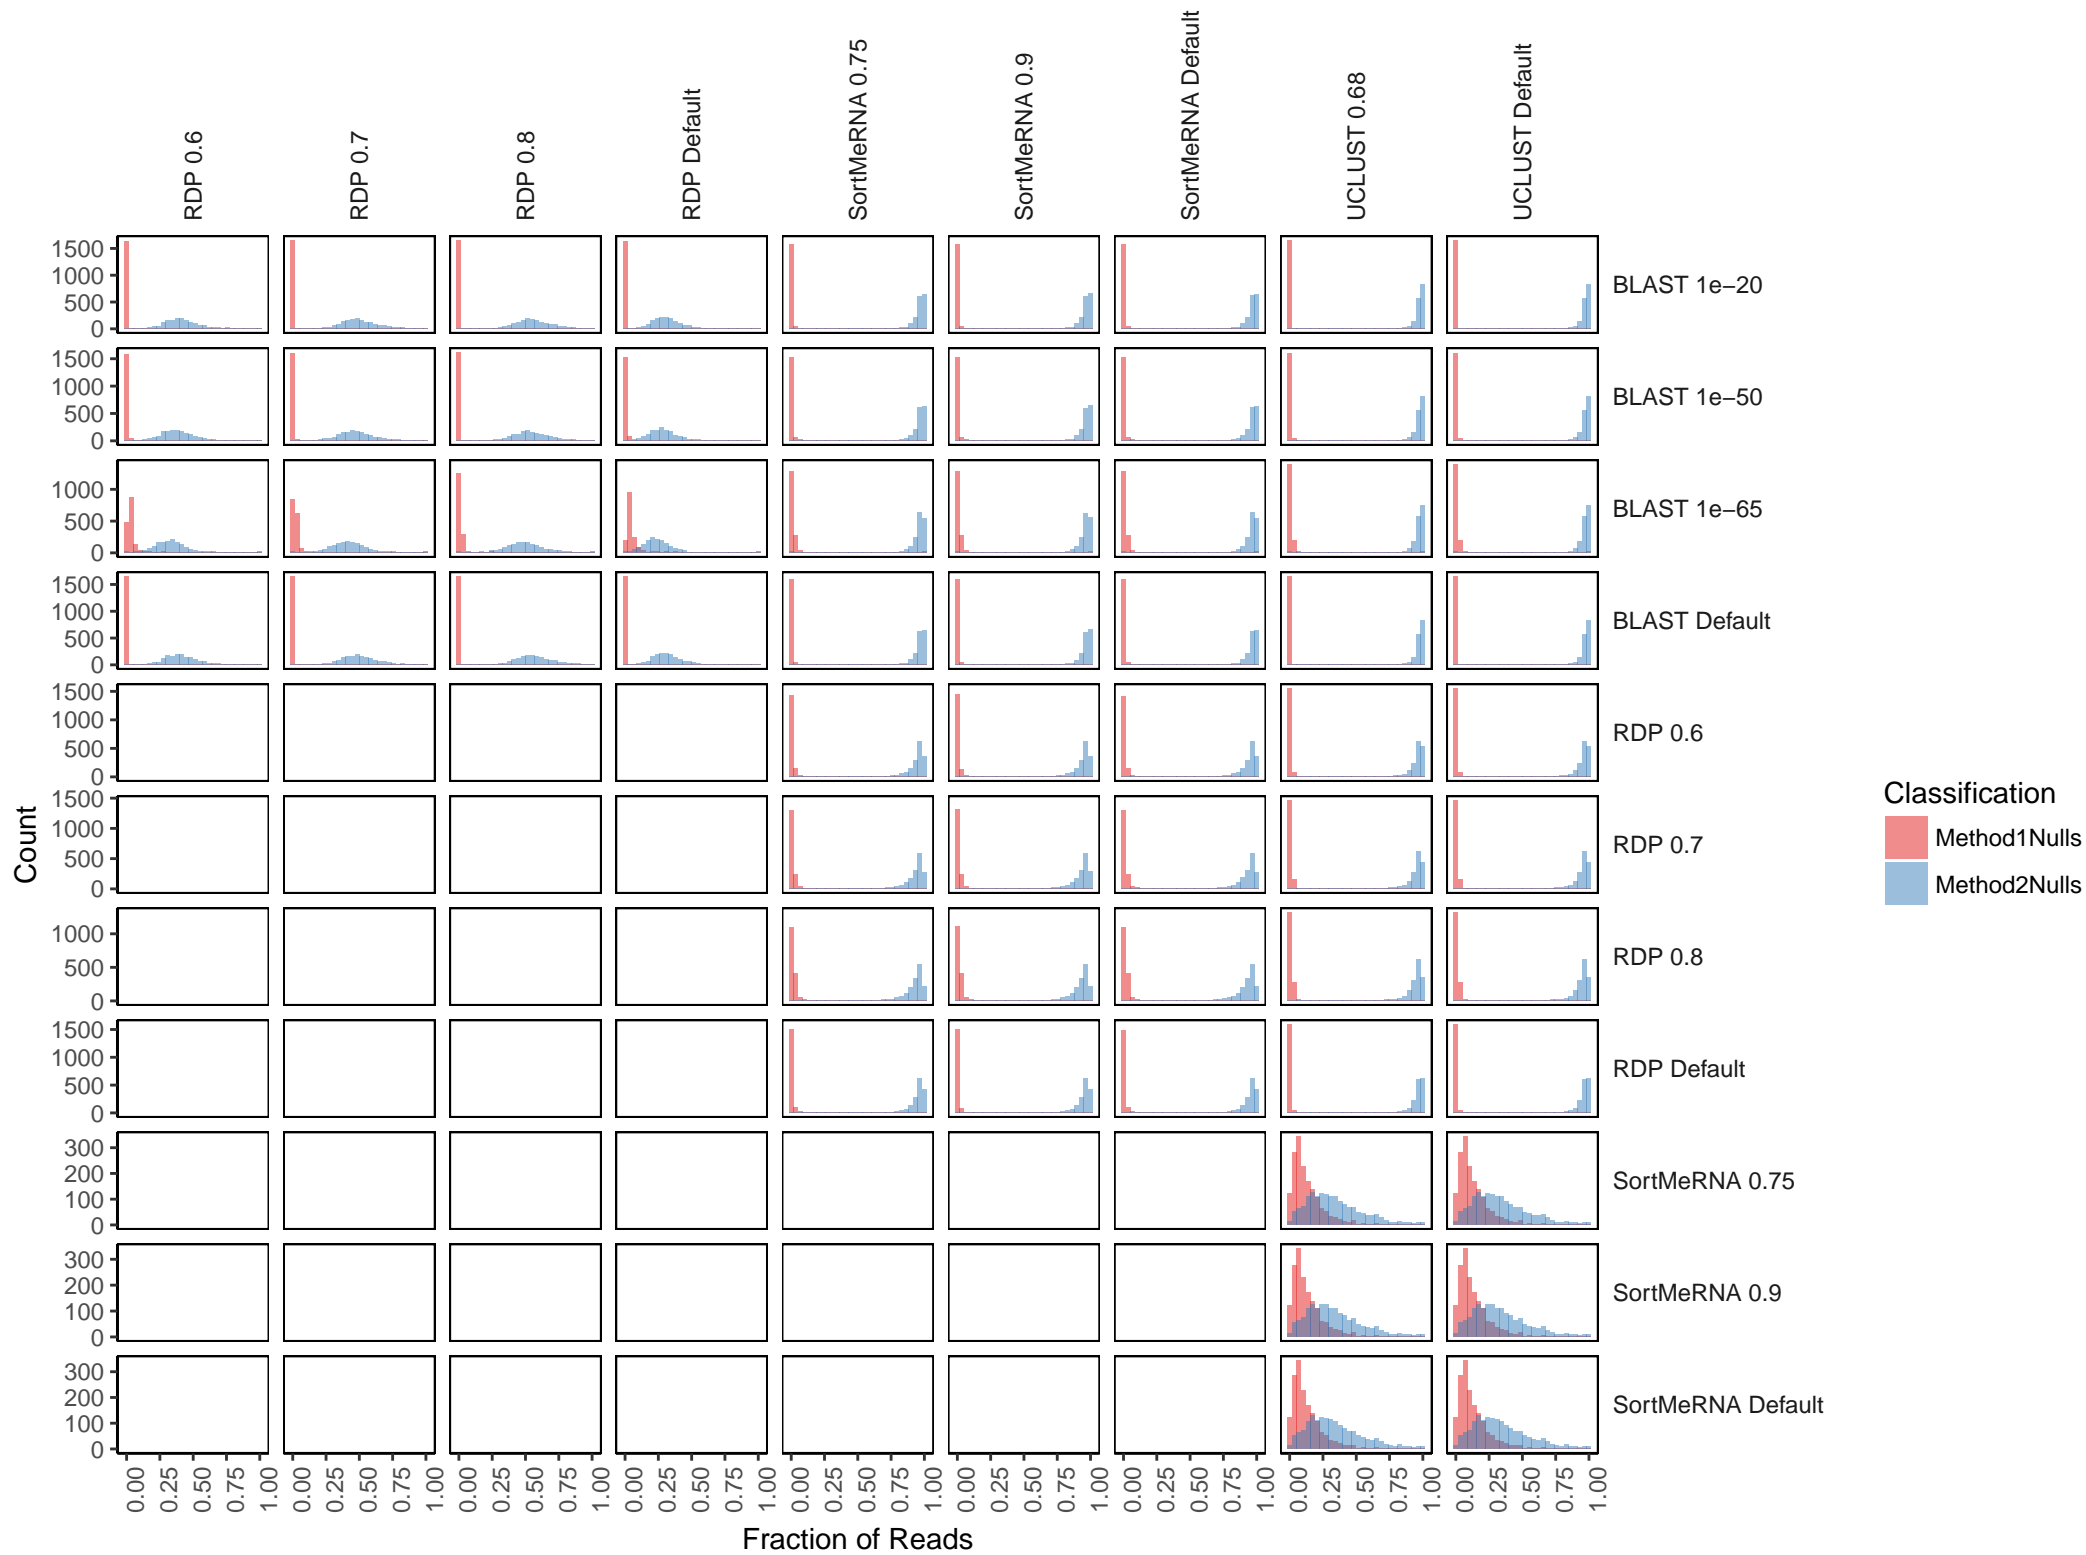

Supplement: SuppMat_allComparisons.pdf [file SuppMat_allComparisons.pdf]
