# Supplementary material for: Segal’s Law, 16S rRNA gene sequencing, and the perils of foodborne pathogen detection within the American Gut Project
Source: PeerJ journal article supplement (doi:10.7717/peerj.3480), 2017-06-22

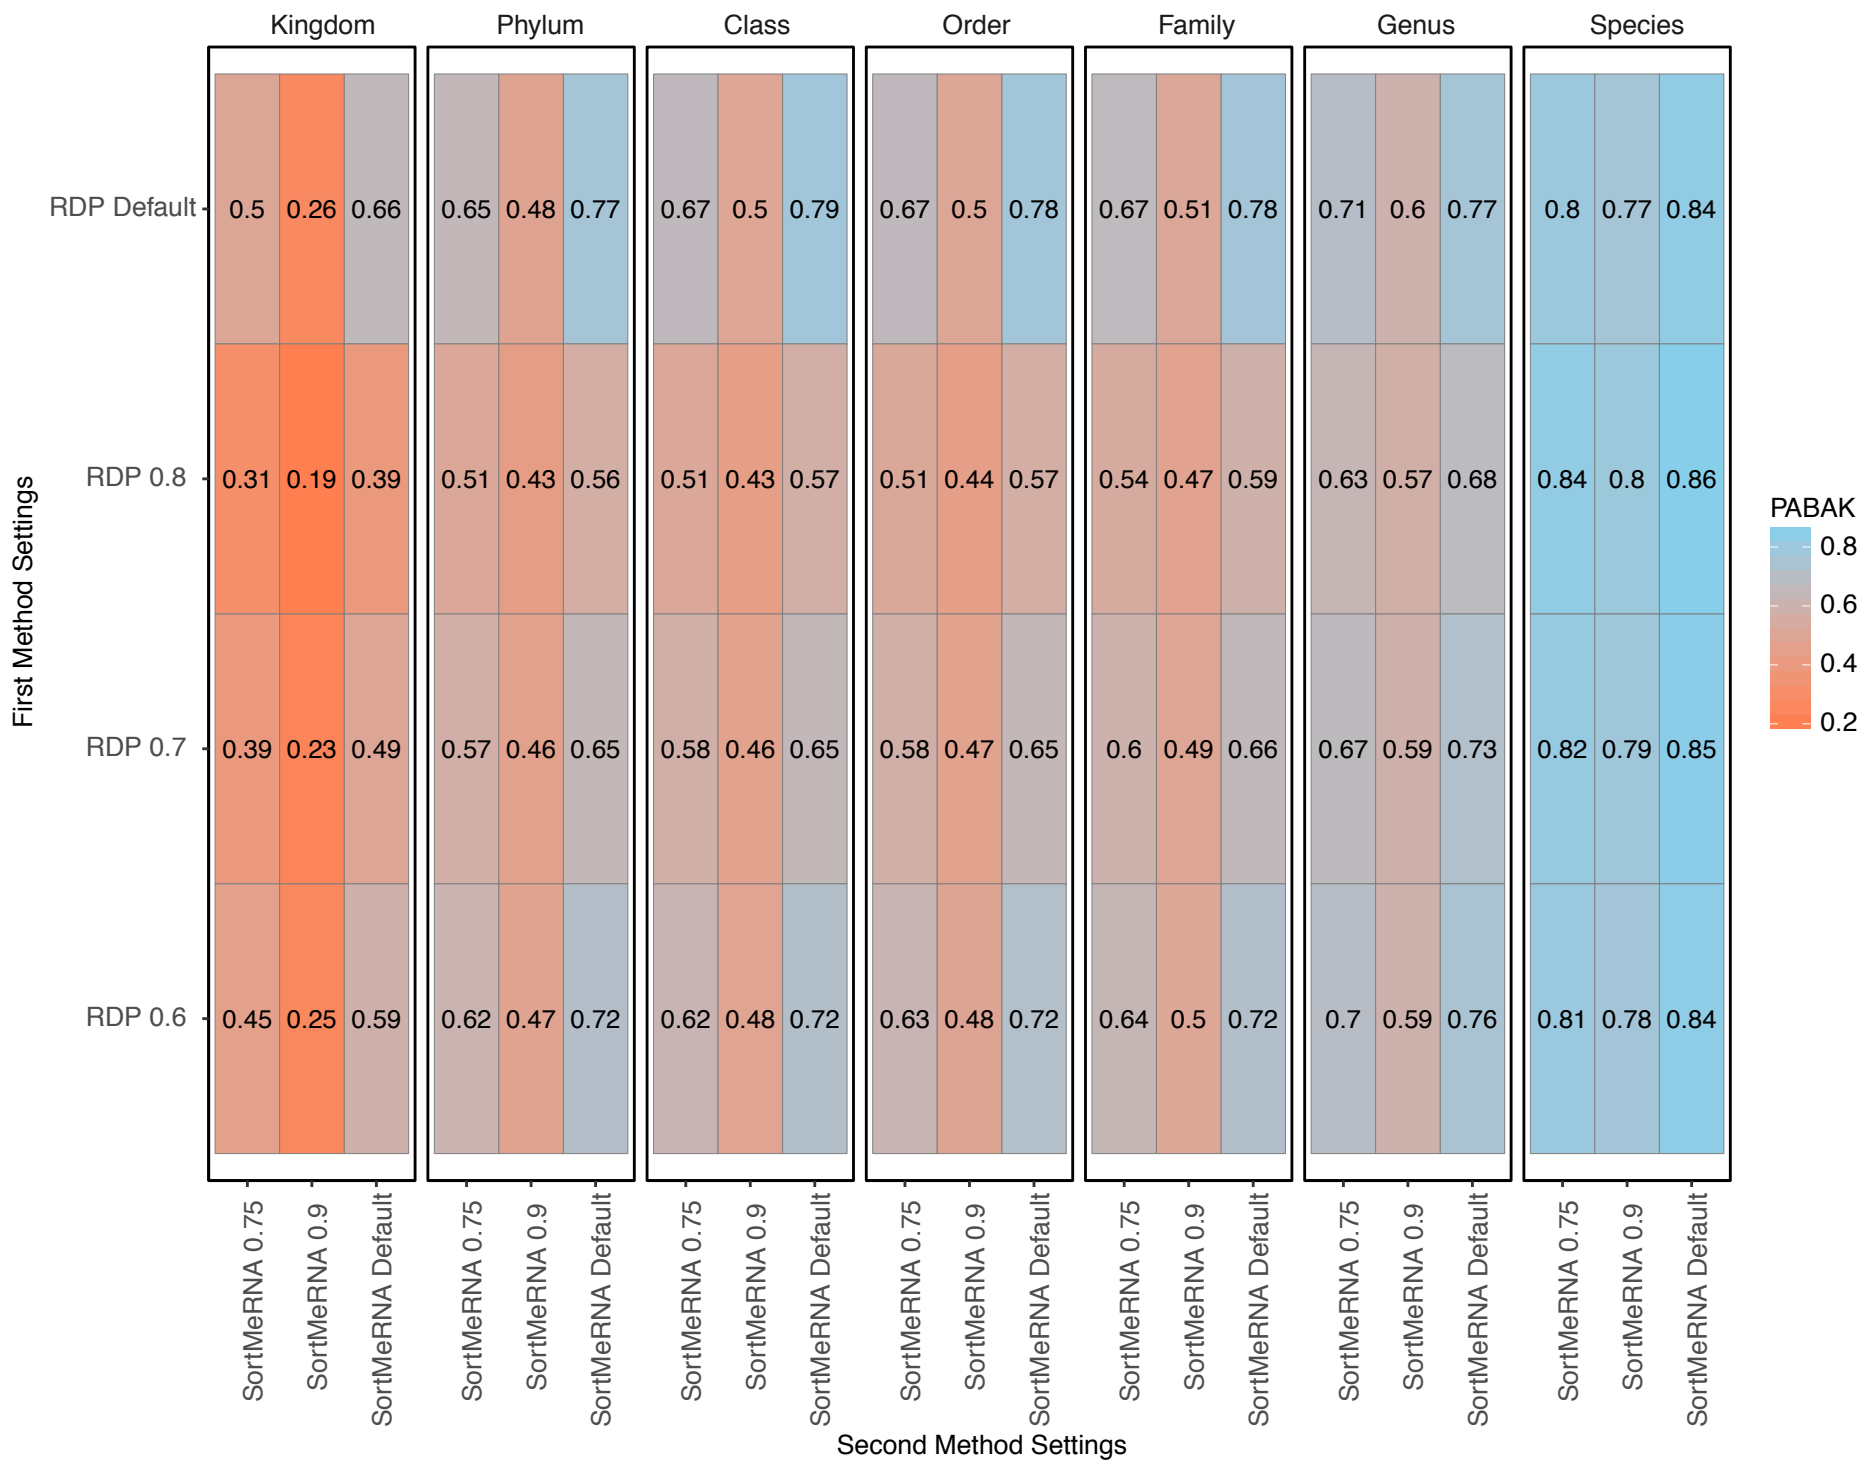

Supplement: SuppMat_S2_PABAKforDefaultsPlot.pdf [file SuppMat_S2_PABAKforDefaultsPlot.pdf]
